# Supplementary material for: meta-Non-flat substituents: a novel molecular design to improve aqueous solubility in small molecule drug discovery
Source: Royal Society of Chemistry journal article supplement (doi:10.1039/d0ob02083d), 2020-12-17
Supplement: d0ob02083d1.pdf [file d0ob02083d1.pdf]

## Supporting information

### **Meta non-flat substituents: A novel molecular design to improving aqueous solubility in small molecule drug discovery**

Yuki Ichikawa<sup>a</sup>, Michiaki Hiramatsu<sup>a</sup>, Yusuke Mita<sup>a</sup>, Makoto Makishima<sup>b</sup>, Yotaro Matsumoto<sup>c</sup>, Yui Masumoto<sup>d</sup>, Atsuya Muranaka<sup>e</sup>, Masanobu Uchiyama<sup>d,e</sup>, Yuichi Hashimoto<sup>a</sup>, Minoru Ishikawa<sup>f\*</sup>

<sup>a</sup> Institute for Quantitative Biosciences, The University of Tokyo, 1-1-1 Yayoi, Bunkyo-ku, Tokyo 113-0032, Japan

<sup>b</sup> Nihon University School of Medicine, 30-1 Oyaguchi-kamicho, Itabashi-ku, Tokyo 173-8610, Japan

<sup>c</sup> Graduate School of Pharmaceutical Sciences, Tohoku University, 6-3, Aoba, Aramaki, Aoba-ku, Sendai, Miyagi 980-8578, Japan.

<sup>d</sup> Graduate School of Pharmaceutical Sciences, The University of Tokyo, 7-3-1 Hongo, Bunkyo-ku Tokyo 113-0033, Japan Elements Chemistry Laboratory and Advanced Elements Chemistry Research Team Center for Sustainable Resource Science (CSRS), Riken, 2-1 Hirosawa, Wako-shi, Saitama 351-0198, Japan

<sup>e</sup> Advanced Elements Chemistry Laboratory, RIKEN Cluster for Pioneering Research (CPR), 2-1 Hirosawa, Wako-shi, Saitama 351-0198, Japan

<sup>f</sup> Graduate School of Life Sciences, Tohoku University, 2-1-1, Katahira, Aoba-ku, Sendai, Miyagi 980-8577, Japan.

Corresponding author:

Minoru ISHIKAWA (Professor of Bioactive Molecules)

Graduate School of Life Sciences, Tohoku University

2-1-1, Katahira, Aoba-ku, Sendai, Miyagi 980-8577, Japan

Tel.: +81 22 217 6197

E-mail address: minoru.ishikawa.e4@tohoku.ac.jp

|                          |         |
|--------------------------|---------|
| Contents                 |         |
| Supplementary Tables 1-9 | page 3  |
| Supplementary Figures 1  | page 26 |
| Experimental section     | page 27 |
| NMR spectra              | page 50 |

Supplementary Table 1. List of melting points of disubstituted benzenes with medicinal chemistry-friendly substituents.

a) The order of melting points among the regioisomers.

|               |                                 | Substituent 1   |       |       |       |       |       |                 |       |                 |       |       |                                 |                    |       |                   |       |                 |                   |       |                  |       |
|---------------|---------------------------------|-----------------|-------|-------|-------|-------|-------|-----------------|-------|-----------------|-------|-------|---------------------------------|--------------------|-------|-------------------|-------|-----------------|-------------------|-------|------------------|-------|
|               |                                 | Non Flat        |       |       |       |       |       |                 |       |                 |       | Flat  |                                 |                    |       |                   |       |                 |                   |       |                  |       |
|               |                                 | Me              | Et    | t-Bu  | F     | Cl    | Br    | CF <sub>3</sub> | CN    | NH <sub>2</sub> | OH    | OMe   | SO <sub>2</sub> NH <sub>2</sub> | SO <sub>2</sub> Me | Ph    | CO <sub>2</sub> H | Ac    | NO <sub>2</sub> | CONH <sub>2</sub> | NHAc  | NMe <sub>2</sub> |       |
| Substituent 2 | Non Flat                        | H mono          | -95.6 | -95.0 | -57.9 | -42.2 | -45.2 | -30.7           | -31.2 | -12.8           | -6.0  | 44.9  | -37.1                           | 156.0              | 90.0  | 70.3              | 122.0 | 20.5            | 5.8               | 128.0 | 114.0            | 2.5   |
|               |                                 | Me              | ortho | -25.2 | -80.7 | -50.3 | -62.5 | -35.9           | -27.5 | -               | -10.5 | -14.4 | 31.0                            | -34.1              | 156.3 | 57.4              | -0.2  | 103.4           | -                 | -3.6  | 145.0            | 111.0 |
|               |                                 | meta            | -47.9 | -95.7 | -41.4 | -89.2 | -47.8 | -38.1           | -     | -23.0           | -30.8 | 12.2  | -55.5                           | 108.0              | 35.0  | 4.5               | 109.3 | -               | 15.9              | 94.5  | 65.9             | -     |
|               |                                 | para            | 13.3  | -62.7 | -52.5 | -56.6 | 7.4   | 26.2            | -     | 28.0            | 43.3  | 34.8  | -31.6                           | 138.0              | 88.0  | 48.1              | 180.0 | -19.0           | 51.7              | 162.5 | 151.0            | -     |
|               |                                 | Et              | ortho | -31.4 | -     | -     | -93.3 | -67.5           | -     | -23.6           | -47.0 | 18.0  | 73.0                            | 127.0              | -     | -6.1              | 75.6  | -19.0           | -12.2             | 153.5 | 114.0            | -     |
|               |                                 | meta            | -83.9 | -75.4 | -     | -55.0 | -     | -               | -     | -64.0           | 0.0   | -5.0  | 89.0                            | -                  | -27.6 | 47.6              | -     | -37.9           | 92.0              | 34.0  | -                | -     |
|               |                                 | para            | -43.3 | -38.4 | -     | -62.5 | -43.4 | -               | -24.2 | -5.1            | 45.0  | -     | 109.0                           | 44.0               | 34.5  | 112.0             | -24.3 | -12.3           | 164.7             | 94.5  | -                | -     |
|               |                                 | t-Bu            | ortho | 27.5  | -     | -     | -     | -               | -     | -60.0           | -5.6  | -     | -                               | 69.5               | 38.0  | 80.5              | -     | -2.6            | -                 | 165.0 | 2.8              | -     |
|               |                                 | meta            | 10.6  | -     | -27.3 | -     | -     | -               | -     | 47.0            | -     | -     | -                               | -                  | 127.3 | -                 | 0.4   | 130.0           | 102.5             | -     | -                | -     |
|               |                                 | para            | 77.6  | -     | 23.9  | 19.0  | -     | -               | 15.0  | 100.0           | 19.1  | 139.6 | 95.0                            | 53.0               | 164.0 | 17.7              | 28.4  | 174.0           | 173.3             | -     | -                | -     |
|               |                                 | F               | ortho | -47.1 | -43.0 | 14.5  | -51.2 | -               | -29.0 | 16.1            | -39.0 | 158.3 | 50.0                            | 73.5               | 124.2 | -                 | -6.0  | 117.5           | 79.5              | -     | -                | -     |
|               |                                 | meta            | -69.1 | -     | -     | -81.5 | -16.1 | -               | 14.0  | -35.0           | 129.5 | 42.0  | 27.0                            | 123.6              | -     | 41.0              | 128.0 | 84.6            | -                 | -     | -                | -     |
|               |                                 | para            | -23.5 | -26.8 | -17.4 | -41.7 | 34.8  | -1.9            | 48.0  | -45.0           | 126.0 | 80.0  | 74.2                            | 183.9              | -45.0 | 26.5              | 154.6 | 151.1           | 30.0              | -     | -                | -     |
|               |                                 | Cl              | ortho | -17.0 | -12.6 | -6.0  | 43.5  | -2.3            | 8.0   | -26.6           | 188.3 | 94.2  | 31.8                            | 140.4              | 66.0  | 32.1              | 141.8 | 86.7            | -                 | -     | -                | -     |
|               |                                 | meta            | -24.8 | -21.4 | -56.0 | 41.0  | -10.3 | 32.5            | -     | 148.0           | 108.0 | 16.0  | 154.2                           | -                  | 43.6  | 133.8             | 76.6  | -               | -                 | -     | -                | -     |
|               |                                 | para            | 53.1  | 64.8  | -33.0 | 91.6  | 70.4  | 43.1            | -18.0 | 146.0           | 98.0  | 75.4  | 239.5                           | 18.4               | 62.2  | 180.0             | 178.4 | 35.5            | -                 | -     | -                | -     |
|               |                                 | Br              | ortho | 6.0   | -     | 55.5  | 30.9  | 5.6             | 2.5   | 186.0           | 108.5 | 0.8   | 149.0                           | 50.6               | 38.5  | 161.5             | 99.2  | -               | -                 | -     | -                | -     |
|               |                                 | meta            | -6.9  | 1.0   | 39.5  | 18.5  | 33.0  | -               | 154.0 | 103.0           | 9.0   | 156.7 | 8.0                             | 54.0               | 156.5 | 87.5              | 11.0  | -               | -                 | -     | -                | -     |
|               |                                 | para            | 87.3  | -     | 114.0 | 78.2  | 63.0  | 13.4            | 166.5 | 105.0           | 87.0  | 254.0 | 51.0                            | 133.0              | 192.5 | 168.0             | 55.0  | -               | -                 | -     | -                | -     |
|               |                                 | CF <sub>3</sub> | ortho | -     | -     | 18.0  | 35.5  | 45.5            | -14.1 | 185.0           | 75.0  | 15.0  | 109.0                           | -                  | 32.5  | 163.0             | 96.5  | -               | -                 | -     | -                | -     |
|               | meta                            | -               | -     | 14.5  | 5.5   | -0.9  | -65.0 | 122.0           | 60.0  | 26.5            | 104.0 | 89.0  | -2.4                            | 121.0              | 103.5 | -                 | -     | -               | -                 | -     | -                |       |
|               | para                            | 2.8             | 37.5  | 38.0  | 47.0  | -9.1  | 184.0 | 101.0           | 71.5  | 220.0           | 29.0  | 43.0  | 187.5                           | 152.4              | 70.8  | -                 | -     | -               | -                 | -     | -                |       |
|               | CN                              | ortho           | 103.0 | 173.5 | 6.2   | 157.0 | 87.0  | 49.1            | 144.6 | 20.0            | 71.0  | 110.5 | 133.5                           | -                  | -     | -                 | -     | -               | -                 | -     | -                |       |
|               | meta                            | 162.0           | 53.0  | 82.8  | 23.0  | 153.0 | 105.0 | 49.0            | 223.0 | 98.5            | 116.6 | 224.0 | 131.0                           | 27.0               | -     | -                 | -     | -               | -                 | -     | -                |       |
|               | para                            | 224.0           | 86.2  | 113.0 | 62.0  | 173.2 | 142.8 | 88.0            | 220.0 | 59.0            | 147.5 | 227.0 | 206.5                           | 75.0               | -     | -                 | -     | -               | -                 | -     | -                |       |
|               | NH <sub>2</sub>                 | ortho           | 103.0 | 173.5 | 6.2   | 157.0 | 87.0  | 49.1            | 144.6 | 20.0            | 71.0  | 110.5 | 133.5                           | -                  | -     | -                 | -     | -               | -                 | -     | -                |       |
|               | meta                            | 65.5            | 122.5 | -1.0  | 140.2 | 73.0  | 31.5  | 179.7           | 98.5  | 112.0           | 117.5 | 88.0  | -                               | -                  | -     | -                 | -     | -               | -                 | -     | -                |       |
|               | para                            | 140.3           | 186.0 | 57.8  | 166.1 | 138.0 | 51.0  | 188.2           | 105.0 | 147.7           | 183.0 | 166.5 | 53.0                            | -                  | -     | -                 | -     | -               | -                 | -     | -                |       |
|               | OH                              | ortho           | 104.6 | 28.3  | 141.0 | 87.5  | 57.5  | 158.6           | 2.5   | 44.9            | 140.0 | 209.0 | 44.5                            | -                  | -     | -                 | -     | -               | -                 | -     | -                |       |
|               | meta                            | 109.8           | -     | 166.0 | 84.0  | 75.3  | 201.3 | 94.0            | 95.0  | 170.5           | 148.5 | 86.0  | -                               | -                  | -     | -                 | -     | -               | -                 | -     | -                |       |
|               | para                            | 173.0           | 54.0  | 178.0 | 96.5  | 168.0 | 213.0 | 108.2           | 113.8 | 162.0           | 168.0 | 77.0  | -                               | -                  | -     | -                 | -     | -               | -                 | -     | -                |       |
|               | OMe                             | ortho           | 22.5  | 171.0 | 93.5  | 29.0  | 100.9 | 34.0            | 9.4   | 129.5           | 87.5  | -     | -                               | -                  | -     | -                 | -     | -               | -                 | -     | -                |       |
|               | meta                            | -35.3           | 130.0 | 47.0  | 88.0  | 107.0 | 60.0  | 38.0            | 134.0 | 81.0            | -     | -     | -                               | -                  | -     | -                 | -     | -               | -                 | -     | -                |       |
|               | para                            | 56.2            | 116.0 | 122.0 | 90.0  | 184.0 | 39.0  | 54.0            | 166.4 | 127.2           | 48.5  | -     | -                               | -                  | -     | -                 | -     | -               | -                 | -     | -                |       |
|               | SO <sub>2</sub> NH <sub>2</sub> | ortho           | 254.0 | -     | 120.5 | 159.0 | -     | 193.7           | -     | 163.0           | 106.5 | -     | -                               | -                  | -     | -                 | -     | -               | -                 | -     | -                |       |
|               | meta                            | 229.0           | 210.0 | 131.0 | 249.0 | 138.0 | 168.0 | 176.0           | 217.0 | 175.0           | -     | -     | -                               | -                  | -     | -                 | -     | -               | -                 | -     | -                |       |
|               | para                            | 289.0           | 244.0 | 228.0 | 291.0 | 178.0 | 181.0 | 238.0           | 219.0 | 216.0           | -     | -     | -                               | -                  | -     | -                 | -     | -               | -                 | -     | -                |       |
|               | SO <sub>2</sub> Me              | ortho           | 228.0 | 101.0 | 140.0 | 103.0 | 136.0 | 155.0           | 147.0 | 95.0            | -     | -     | -                               | -                  | -     | -                 | -     | -               | -                 | -     | -                |       |
|               | meta                            | 200.0           | 85.0  | 236.5 | 106.0 | 148.0 | 177.0 | 142.5           | 85.0  | -               | -     | -     | -                               | -                  | -     | -                 | -     | -               | -                 | -     | -                |       |
|               | para                            | 261.0           | 145.0 | 274.5 | 129.0 | 142.5 | 226.5 | 188.0           | 168.0 | -               | -     | -     | -                               | -                  | -     | -                 | -     | -               | -                 | -     | -                |       |
|               | Ph                              | ortho           | 56.2  | 112.0 | 56.0  | 37.0  | 175.0 | 121.5           | -     | -               | -     | -     | -                               | -                  | -     | -                 | -     | -               | -                 | -     | -                |       |
|               | meta                            | 86.9            | 162.5 | 36.0  | 61.0  | 173.0 | 149.0 | -               | -     | -               | -     | -     | -                               | -                  | -     | -                 | -     | -               | -                 | -     | -                |       |
|               | para                            | 213.8           | 228.8 | 121.0 | 112.9 | 223.0 | 171.2 | 126.0           | -     | -               | -     | -     | -                               | -                  | -     | -                 | -     | -               | -                 | -     | -                |       |
|               | CO <sub>2</sub> H               | ortho           | 207.0 | 114.5 | 147.0 | 28.5  | 187.5 | 72.0            | -     | -               | -     | -     | -                               | -                  | -     | -                 | -     | -               | -                 | -     | -                |       |
|               | meta                            | 348.0           | 172.0 | 141.3 | 81.0  | 249.0 | 152.5 | -               | -     | -               | -     | -     | -                               | -                  | -     | -                 | -     | -               | -                 | -     | -                |       |
|               | para                            | 440.0           | 208.0 | 241.0 | 80.0  | 256.5 | 242.5 | -               | -     | -               | -     | -     | -                               | -                  | -     | -                 | -     | -               | -                 | -     | -                |       |
|               | Ac                              | ortho           | 42.0  | 28.5  | 116.5 | 77.0  | -     | -               | -     | -               | -     | -     | -                               | -                  | -     | -                 | -     | -               | -                 | -     | -                |       |
|               | meta                            | 32.0            | 81.0  | 126.5 | 129.0 | 43.0  | -     | -               | -     | -               | -     | -     | -                               | -                  | -     | -                 | -     | -               | -                 | -     | -                |       |
|               | para                            | 113.0           | 80.0  | 192.0 | 169.0 | 105.5 | -     | -               | -     | -               | -     | -     | -                               | -                  | -     | -                 | -     | -               | -                 | -     | -                |       |
|               | NO <sub>2</sub>                 | ortho           | 115.8 | 176.6 | 93.0  | -20.0 | -     | -               | -     | -               | -     | -     | -                               | -                  | -     | -                 | -     | -               | -                 | -     | -                |       |
|               | meta                            | 90.8            | 143.3 | 154.5 | 60.0  | -     | -     | -               | -     | -               | -     | -     | -                               | -                  | -     | -                 | -     | -               | -                 | -     | -                |       |
|               | para                            | 171.1           | 190.0 | 216.0 | 164.0 | -     | -     | -               | -     | -               | -     | -     | -                               | -                  | -     | -                 | -     | -               | -                 | -     | -                |       |
|               | CONH <sub>2</sub>               | ortho           | 222.0 | 190.0 | 140.0 | -     | -     | -               | -     | -               | -     | -     | -                               | -                  | -     | -                 | -     | -               | -                 | -     | -                |       |
|               | meta                            | 280.0           | 219.5 | 153.0 | -     | -     | -     | -               | -     | -               | -     | -     | -                               | -                  | -     | -                 | -     | -               | -                 | -     | -                |       |
|               | para                            | 322.3           | 274.5 | 208.0 | -     | -     | -     | -               | -     | -               | -     | -     | -                               | -                  | -     | -                 | -     | -               | -                 | -     | -                |       |
|               | NHAc                            | ortho           | 188.7 | 73.0  | -     | -     | -     | -               | -     | -               | -     | -     | -                               | -                  | -     | -                 | -     | -               | -                 | -     | -                |       |
|               | meta                            | 188.0           | 86.5  | -     | -     | -     | -     | -               | -     | -               | -     | -     | -                               | -                  | -     | -                 | -     | -               | -                 | -     | -                |       |
|               | para                            | 310.0           | 132.0 | -     | -     | -     | -     | -               | -     | -               | -     | -     | -                               | -                  | -     | -                 | -     | -               | -                 | -     | -                |       |
|               | NMe <sub>2</sub>                | ortho           | 8.9   | -     | -     | -     | -     | -               | -     | -               | -     | -     | -                               | -                  | -     | -                 | -     | -               | -                 | -     | -                |       |
|               | meta                            | -2.0            | -     | -     | -     | -     | -     | -               | -     | -               | -     | -     | -                               | -                  | -     | -                 | -     | -               | -                 | -     | -                |       |
|               | para                            | 51.0            | -     | -     | -     | -     | -     | -               | -     | -               | -     | -     | -                               | -                  | -     | -                 | -     | -               | -                 | -     | -                |       |

Red and blue figures indicate the lowest and the highest melting point among the three regioisomers, respectively. For definitions of “flat” and “non-flat”, see Supplementary Table 2.

b) List of reference sources of melting points

|                                 |                 | Substituent 1 |       |       |       |       |       |                 |       |                 |       |       |                                 |                    |       |                   |       |                 |                   |       |                  |       |
|---------------------------------|-----------------|---------------|-------|-------|-------|-------|-------|-----------------|-------|-----------------|-------|-------|---------------------------------|--------------------|-------|-------------------|-------|-----------------|-------------------|-------|------------------|-------|
|                                 |                 | Me            | Et    | t-Bu  | F     | Cl    | Br    | CF <sub>3</sub> | CN    | NH <sub>2</sub> | OH    | OMe   | SO <sub>2</sub> NH <sub>2</sub> | SO <sub>2</sub> Me | Ph    | CO <sub>2</sub> H | Ac    | NO <sub>2</sub> | CONH <sub>2</sub> | NHAc  | NMe <sub>2</sub> |       |
| Substituent 2                   | H               | <i>mono</i>   | -95.6 | -95.0 | -57.9 | -42.2 | -45.2 | -30.7           | -31.2 | -12.8           | -6.0  | 44.9  | -37.1                           | 156.0              | 90.0  | 70.3              | 122.0 | 20.5            | 5.8               | 128.0 | 114.0            | 2.5   |
|                                 | Me              | <i>ortho</i>  | -25.2 | -80.7 | -50.3 | -62.5 | -35.9 | -27.5           | -     | -10.5           | -14.4 | 31.0  | -34.1                           | 156.3              | 57.4  | -0.2              | 103.4 | -               | -3.6              | 145.0 | 111.0            | -61.3 |
|                                 |                 | <i>meta</i>   | -47.9 | -95.7 | -41.4 | -89.2 | -47.8 | -38.1           | -     | -23.0           | -30.8 | 12.2  | -55.5                           | 108.0              | 35.0  | 4.5               | 109.3 | -               | 15.9              | 94.5  | 65.9             | -     |
|                                 |                 | <i>para</i>   | 13.3  | -62.7 | -52.5 | -56.6 | 7.4   | 26.2            | -     | 28.0            | 43.3  | 34.8  | -31.6                           | 138.0              | 88.0  | 48.1              | 180.0 | -19.0           | 51.7              | 162.5 | 151.0            | -     |
|                                 | Et              | <i>ortho</i>  | -31.4 | -     | -     | -83.3 | -67.5 | -               | -23.6 | -47.0           | 18.0  | 73.0  | 127.0                           | -                  | -6.1  | 75.6              | -19.0 | -12.2           | 153.5             | 114.0 | -                | -     |
|                                 |                 | <i>meta</i>   | -83.9 | -75.4 | -     | -55.0 | -     | -               | -     | -64.0           | 0.0   | -5.0  | 89.0                            | -                  | -27.6 | 47.6              | -     | -37.9           | 92.0              | 34.0  | -                | -     |
|                                 |                 | <i>para</i>   | -43.3 | -38.4 | -     | -62.5 | -43.4 | -               | -24.2 | -5.1            | 45.0  | -     | 109.0                           | 44.0               | 34.5  | 112.0             | -24.3 | -12.3           | 164.7             | 94.5  | -                | -     |
|                                 | t-Bu            | <i>ortho</i>  | 27.5  | -     | -     | -     | -     | -               | -60.0 | -5.6            | -     | -     | 69.5                            | 38.0               | 80.5  | -                 | -2.6  | -               | 165.0             | 2.8   | -                | -     |
|                                 |                 | <i>meta</i>   | 10.6  | -     | -27.3 | -     | -     | -               | -     | 47.0            | -     | -     | -                               | -                  | -     | 127.3             | -     | 0.4             | 130.0             | 102.5 | -                | -     |
|                                 |                 | <i>para</i>   | 77.6  | -     | 23.9  | 19.0  | -     | -               | 15.0  | 100.0           | 19.1  | 139.6 | 95.0                            | 53.0               | 164.0 | 17.7              | 28.4  | 174.0           | 173.3             | -     | -                | -     |
|                                 | F               | <i>ortho</i>  | -47.1 | -43.0 | 14.5  | -51.2 | -     | -               | -29.0 | 16.1            | -39.0 | 158.5 | 50.0                            | 73.5               | 124.2 | -                 | -6.0  | 117.5           | 79.5              | -     | -                | -     |
|                                 |                 | <i>meta</i>   | -69.1 | -     | -     | -81.5 | -16.1 | -               | 14.0  | -35.0           | 129.5 | 42.0  | 27.0                            | 123.6              | -     | 127.3             | -     | 41.0            | 128.0             | 84.6  | -                | -     |
|                                 |                 | <i>para</i>   | -23.5 | -26.8 | -17.4 | -41.7 | 34.8  | -1.9            | 48.0  | -45.0           | 126.0 | 80.0  | 74.2                            | 183.9              | -45.0 | 26.5              | 154.6 | 151.1           | 30.0              | -     | -                | -     |
|                                 | Cl              | <i>ortho</i>  | -17.0 | -12.6 | -6.0  | 43.5  | -2.3  | 8.0             | -26.6 | 188.3           | 94.2  | 31.8  | 140.4                           | 66.0               | 32.1  | 141.8             | 86.7  | -               | -                 | -     | -                | -     |
|                                 |                 | <i>meta</i>   | -24.8 | -21.4 | -56.0 | 41.0  | -10.3 | 32.5            | -     | 148.0           | 108.0 | 16.0  | 154.2                           | -                  | 43.6  | 133.8             | 76.6  | -               | -                 | -     | -                | -     |
|                                 |                 | <i>para</i>   | 53.1  | 64.8  | -33.0 | 91.6  | 70.4  | 43.1            | -18.0 | 146.0           | 98.0  | 75.4  | 239.5                           | 18.4               | 82.2  | 180.0             | 178.4 | 35.5            | -                 | -     | -                | -     |
|                                 | Br              | <i>ortho</i>  | 6.0   | -     | 55.5  | 30.9  | 5.6   | 2.5             | 186.0 | 108.5           | 0.8   | 149.0 | 50.6                            | 38.5               | 161.5 | 99.2              | -     | -               | -                 | -     | -                | -     |
|                                 |                 | <i>meta</i>   | -6.9  | 1.0   | 39.5  | 18.5  | 33.0  | -               | 154.0 | 103.0           | 9.0   | 156.7 | 8.0                             | 54.0               | 156.5 | 87.5              | 11.0  | -               | -                 | -     | -                | -     |
|                                 |                 | <i>para</i>   | 87.3  | -     | 114.0 | 78.2  | 63.0  | 13.4            | 166.5 | 105.0           | 87.0  | 254.0 | 51.0                            | 133.0              | 192.5 | 168.0             | 55.0  | -               | -                 | -     | -                | -     |
|                                 | CF <sub>3</sub> | <i>ortho</i>  | -     | -     | 18.0  | 35.5  | 45.5  | -14.1           | 185.0 | 75.0            | 15.0  | 109.0 | -                               | 32.5               | 163.0 | 96.5              | -     | -               | -                 | -     | -                | -     |
|                                 |                 | <i>meta</i>   | -     | -     | 14.5  | 5.5   | -0.9  | -65.0           | 122.0 | 60.0            | 26.5  | 104.0 | 89.0                            | -2.4               | 121.0 | 103.5             | -     | -               | -                 | -     | -                | -     |
|                                 |                 | <i>para</i>   | 2.8   | 37.5  | 38.0  | 47.0  | -9.1  | 184.0           | 101.0 | 71.5            | 220.0 | 29.0  | 43.0                            | 187.5              | 152.4 | 70.8              | -     | -               | -                 | -     | -                | -     |
|                                 | CN              | <i>ortho</i>  | 140.9 | 51.0  | 98.0  | 59.0  | 160.0 | 104.0           | 39.0  | 190.0           | 49.0  | 115.0 | 173.0                           | 199.5              | -     | -                 | -     | -               | -                 | -     | -                | -     |
|                                 |                 | <i>meta</i>   | 162.0 | 53.0  | 82.8  | 23.0  | 153.0 | 105.0           | 49.0  | 223.0           | 98.5  | 116.6 | 224.0                           | 131.0              | 27.0  | -                 | -     | -               | -                 | -     | -                | -     |
| <i>para</i>                     |                 | 224.0         | 86.2  | 113.0 | 62.0  | 173.2 | 142.8 | 88.0            | 220.0 | 59.0            | 147.5 | 227.0 | 206.5                           | 75.0               | -     | -                 | -     | -               | -                 | -     | -                |       |
| NH <sub>2</sub>                 | <i>ortho</i>    | 103.0         | 173.5 | 6.2   | 157.0 | 87.0  | 49.1  | 144.6           | 20.0  | 71.0            | 110.5 | 133.5 | -                               | -                  | -     | -                 | -     | -               | -                 | -     | -                |       |
|                                 | <i>meta</i>     | 65.5          | 122.5 | -1.0  | 140.2 | 73.0  | 31.5  | 179.7           | 98.5  | 112.0           | 117.5 | 88.0  | -                               | -                  | -     | -                 | -     | -               | -                 | -     | -                |       |
|                                 | <i>para</i>     | 140.3         | 186.0 | 57.8  | 166.1 | 138.0 | 51.0  | 188.2           | 105.0 | 147.7           | 183.0 | 166.5 | 53.0                            | -                  | -     | -                 | -     | -               | -                 | -     | -                |       |
| OH                              | <i>ortho</i>    | 104.6         | 28.3  | 141.0 | 87.5  | 57.5  | 158.6 | 2.5             | 44.9  | 140.0           | 209.0 | 44.5  | -                               | -                  | -     | -                 | -     | -               | -                 | -     | -                |       |
|                                 | <i>meta</i>     | 109.8         | -     | 166.0 | 84.0  | 75.3  | 201.3 | 94.0            | 95.0  | 170.5           | 148.5 | 86.0  | -                               | -                  | -     | -                 | -     | -               | -                 | -     | -                |       |
|                                 | <i>para</i>     | 173.0         | 54.0  | 178.0 | 96.5  | 168.0 | 213.0 | 108.2           | 113.8 | 162.0           | 168.0 | 77.0  | -                               | -                  | -     | -                 | -     | -               | -                 | -     | -                |       |
| OMe                             | <i>ortho</i>    | 22.5          | 171.0 | 93.5  | 29.0  | 100.9 | 34.0  | 9.4             | 129.5 | 87.5            | -     | -     | -                               | -                  | -     | -                 | -     | -               | -                 | -     | -                |       |
|                                 | <i>meta</i>     | -35.3         | 130.0 | 47.0  | 88.0  | 107.0 | 60.0  | 38.0            | 134.0 | 81.0            | -     | -     | -                               | -                  | -     | -                 | -     | -               | -                 | -     | -                |       |
|                                 | <i>para</i>     | 56.2          | 116.0 | 122.0 | 90.0  | 184.0 | 39.0  | 54.0            | 166.4 | 127.2           | 48.5  | -     | -                               | -                  | -     | -                 | -     | -               | -                 | -     | -                |       |
| SO <sub>2</sub> NH <sub>2</sub> | <i>ortho</i>    | 254.0         | -     | 120.5 | 159.0 | -     | 193.7 | -               | 163.0 | 106.5           | -     | -     | -                               | -                  | -     | -                 | -     | -               | -                 | -     | -                |       |
|                                 | <i>meta</i>     | 229.0         | 210.0 | 131.0 | 249.0 | 138.0 | 168.0 | 176.0           | 217.0 | 175.0           | -     | -     | -                               | -                  | -     | -                 | -     | -               | -                 | -     | -                |       |
|                                 | <i>para</i>     | 289.0         | 244.0 | 228.0 | 291.0 | 178.0 | 181.0 | 238.0           | 219.0 | 216.0           | -     | -     | -                               | -                  | -     | -                 | -     | -               | -                 | -     | -                |       |
| SO <sub>2</sub> Me              | <i>ortho</i>    | 228.0         | 101.0 | 140.0 | 103.0 | 136.0 | 155.0 | 147.0           | 95.0  | -               | -     | -     | -                               | -                  | -     | -                 | -     | -               | -                 | -     | -                |       |
|                                 | <i>meta</i>     | 200.0         | 85.0  | 236.5 | 106.0 | 148.0 | 177.0 | 142.5           | 85.0  | -               | -     | -     | -                               | -                  | -     | -                 | -     | -               | -                 | -     | -                |       |
|                                 | <i>para</i>     | 261.0         | 145.0 | 274.5 | 129.0 | 142.5 | 226.5 | 188.0           | 168.0 | -               | -     | -     | -                               | -                  | -     | -                 | -     | -               | -                 | -     | -                |       |
| Ph                              | <i>ortho</i>    | 56.2          | 112.0 | 56.0  | 37.0  | 175.0 | 121.5 | -               | -     | -               | -     | -     | -                               | -                  | -     | -                 | -     | -               | -                 | -     | -                |       |
|                                 | <i>meta</i>     | 86.9          | 162.5 | 36.0  | 61.0  | 173.0 | 149.0 | -               | -     | -               | -     | -     | -                               | -                  | -     | -                 | -     | -               | -                 | -     | -                |       |
|                                 | <i>para</i>     | 213.8         | 228.8 | 121.0 | 112.9 | 223.0 | 171.2 | 126.0           | -     | -               | -     | -     | -                               | -                  | -     | -                 | -     | -               | -                 | -     | -                |       |
| CO <sub>2</sub> H               | <i>ortho</i>    | 207.0         | 114.5 | 147.0 | 28.5  | 187.5 | 72.0  | -               | -     | -               | -     | -     | -                               | -                  | -     | -                 | -     | -               | -                 | -     | -                |       |
|                                 | <i>meta</i>     | 348.0         | 172.0 | 141.3 | 81.0  | 249.0 | 152.5 | -               | -     | -               | -     | -     | -                               | -                  | -     | -                 | -     | -               | -                 | -     | -                |       |
|                                 | <i>para</i>     | 440.0         | 208.0 | 241.0 | 80.0  | 256.5 | 242.5 | -               | -     | -               | -     | -     | -                               | -                  | -     | -                 | -     | -               | -                 | -     | -                |       |
| Ac                              | <i>ortho</i>    | 42.0          | 28.5  | 116.5 | 77.0  | -     | -     | -               | -     | -               | -     | -     | -                               | -                  | -     | -                 | -     | -               | -                 | -     | -                |       |
|                                 | <i>meta</i>     | 32.0          | 81.0  | 126.5 | 129.0 | 43.0  | -     | -               | -     | -               | -     | -     | -                               | -                  | -     | -                 | -     | -               | -                 | -     | -                |       |
|                                 | <i>para</i>     | 113.0         | 80.0  | 192.0 | 169.0 | 105.5 | -     | -               | -     | -               | -     | -     | -                               | -                  | -     | -                 | -     | -               | -                 | -     | -                |       |
| NO <sub>2</sub>                 | <i>ortho</i>    | 115.8         | 176.6 | 93.0  | -20.0 | -     | -     | -               | -     | -               | -     | -     | -                               | -                  | -     | -                 | -     | -               | -                 | -     | -                |       |
|                                 | <i>meta</i>     | 90.8          | 143.3 | 154.5 | 60.0  | -     | -     | -               | -     | -               | -     | -     | -                               | -                  | -     | -                 | -     | -               | -                 | -     | -                |       |
|                                 | <i>para</i>     | 171.1         | 190.0 | 216.0 | 164.0 | -     | -     | -               | -     | -               | -     | -     | -                               | -                  | -     | -                 | -     | -               | -                 | -     | -                |       |
| CONH <sub>2</sub>               | <i>ortho</i>    | 222.0         | 190.0 | 140.0 | -     | -     | -     | -               | -     | -               | -     | -     | -                               | -                  | -     | -                 | -     | -               | -                 | -     | -                |       |
|                                 | <i>meta</i>     | 280.0         | 219.5 | 153.0 | -     | -     | -     | -               | -     | -               | -     | -     | -                               | -                  | -     | -                 | -     | -               | -                 | -     | -                |       |
|                                 | <i>para</i>     | 322.3         | 274.5 | 208.0 | -     | -     | -     | -               | -     | -               | -     | -     | -                               | -                  | -     | -                 | -     | -               | -                 | -     | -                |       |
| NHAc                            | <i>ortho</i>    | 188.7         | 73.0  | -     | -     | -     | -     | -               | -     | -               | -     | -     | -                               | -                  | -     | -                 | -     | -               | -                 | -     | -                |       |
|                                 | <i>meta</i>     | 188.0         | 86.5  | -     | -     | -     | -     | -               | -     | -               | -     | -     | -                               | -                  | -     | -                 | -     | -               | -                 | -     | -                |       |
|                                 | <i>para</i>     | 310.0         | 132.0 | -     | -     | -     | -     | -               | -     | -               | -     | -     | -                               | -                  | -     | -                 | -     | -               | -                 | -     | -                |       |
| NMe <sub>2</sub>                | <i>ortho</i>    | 8.9           | -     | -     | -     | -     | -     | -               | -     | -               | -     | -     | -                               | -                  | -     | -                 | -     | -               | -                 | -     | -                |       |
|                                 | <i>meta</i>     | -2.0          | -     | -     | -     | -     | -     | -               | -     | -               | -     | -     | -                               | -                  | -     | -                 | -     | -               | -                 | -     | -                |       |
|                                 | <i>para</i>     | 51.0          | -     | -     | -     | -     | -     | -               | -     | -               | -     | -     | -                               | -                  | -     | -                 | -     | -               | -                 | -     | -                |       |

Sources

|                                                                                         |
|-----------------------------------------------------------------------------------------|
| CRC Handbook of Chemistry and Physics onDVD 93rd Edition Version 2013, CRC Press , 2013 |
| Beilsteins Handbuch der organischen Chemie, Springer, 1985-1993                         |
| reaxys, <a href="https://www.reaxys.com">https://www.reaxys.com</a> , Elsevier          |

A blank column means that the melting points were not available in these three databases.

Supplementary Table 2. Dihedral angles of disubstituted benzenes with substituents bearing an sp<sup>2</sup> atom

| R <sup>1</sup> | R <sup>2</sup>     | CSD refcode  | Measured dihedral angles |       |       |        | Corrected dihedral angles |       |       |       | Absolute difference value |     |     |      | result |      |
|----------------|--------------------|--------------|--------------------------|-------|-------|--------|---------------------------|-------|-------|-------|---------------------------|-----|-----|------|--------|------|
|                |                    |              | reference                | 1     | 2     | 3      | reference                 | 1     | 2'    | 3'    | 1                         | 2'  | 3'  | Mean |        |      |
| Ph             | H                  | -            | BIPHN                    | 0.1   | -0.1  | 180.0  | 180.0                     | 0.1   | -0.1  | 0.0   | 0.0                       | 0.2 | 0.1 | 0.1  | 0.1    | Flat |
| Ph             | Br                 | <i>para</i>  | BRBIPH                   | 15.6  | 23.8  | -161.5 | -159.1                    | 15.6  | 23.8  | 18.5  | 20.9                      | 8.2 | 2.9 | 5.3  | 5.5    | Flat |
| Ph             | OH                 | <i>ortho</i> | FIFMAI                   | -58.9 | -54.3 | 123.3  | 123.4                     | -58.9 | -54.3 | -56.7 | -56.6                     | 4.6 | 2.3 | 2.4  | 3.1    | Flat |
| Ph             | OH                 | <i>para</i>  | BOPSAA02                 | -2.8  | -2.7  | 176.9  | 177.6                     | -2.8  | -2.7  | -3.1  | -2.4                      | 0.1 | 0.3 | 0.4  | 0.2    | Flat |
| Ph             | Ph                 | <i>ortho</i> | TERPHO02                 | -63.3 | -60.6 | 119.9  | 116.2                     | -63.3 | -60.6 | -60.1 | -63.8                     | 2.7 | 3.2 | 0.5  | 2.1    | Flat |
| Ph             | Ph                 | <i>meta</i>  | ZZZMTW01                 | -30.5 | -32.1 | 149.1  | 148.4                     | -30.5 | -32.1 | -31.0 | -31.6                     | 1.6 | 0.5 | 1.1  | 1.1    | Flat |
| Ph             | Ph                 | <i>para</i>  | TERPE01                  | -0.7  | -1.3  | 178.8  | 179.2                     | -0.7  | -1.3  | -1.2  | -0.8                      | 0.5 | 0.4 | 0.1  | 0.3    | Flat |
| Ph             | COOH               | <i>ortho</i> | NOZVIH                   | -46.4 | -46.7 | 131.7  | 135.2                     | -46.4 | -46.7 | -48.3 | -44.8                     | 0.3 | 1.9 | 1.6  | 1.3    | Flat |
| Ph             | COOH               | <i>meta</i>  | TEJMAW01                 | -31.5 | -31.5 | 148.0  | 149.1                     | -31.5 | -31.5 | -32.0 | -31.0                     | 0.1 | 0.5 | 0.6  | 0.4    | Flat |
| Ph             | COOH               | <i>para</i>  | BOPSEE10                 | 35.1  | 35.4  | -145.3 | -144.1                    | 35.1  | 35.4  | 34.7  | 35.9                      | 0.3 | 0.4 | 0.9  | 0.5    | Flat |
| Ph             | NO <sub>2</sub>    | <i>ortho</i> | LESYEN                   | -63.0 | -63.3 | 115.2  | 118.6                     | -63.0 | -63.3 | -64.9 | -61.4                     | 0.3 | 1.9 | 1.6  | 1.3    | Flat |
| Ph             | NO <sub>2</sub>    | <i>meta</i>  | ZENKIM                   | -25.3 | -27.7 | 154.2  | 152.8                     | -25.3 | -27.7 | -25.8 | -27.2                     | 2.4 | 0.5 | 1.9  | 1.6    | Flat |
| Ph             | NO <sub>2</sub>    | <i>para</i>  | NBPHEN                   | -32.5 | -32.3 | 149.2  | 146.1                     | -32.5 | -32.3 | -30.8 | -34.0                     | 0.2 | 1.7 | 1.5  | 1.1    | Flat |
| COOH           | Me                 | <i>ortho</i> | OTOLIC02                 | 1.5   | 1.7   | -178.1 | -178.7                    | 1.5   | 1.7   | 1.9   | 1.3                       | 0.2 | 0.4 | 0.2  | 0.2    | Flat |
| COOH           | Me                 | <i>meta</i>  | ZZZKI01                  | -2.9  | -3.5  | 176.2  | 177.5                     | -2.9  | -3.5  | -3.8  | -2.5                      | 0.6 | 0.9 | 0.3  | 0.6    | Flat |
| COOH           | Me                 | <i>para</i>  | PTOLIC                   | 2.8   | 3.0   | -177.4 | -178.9                    | 2.8   | 3.0   | 2.7   | 1.2                       | 0.3 | 0.1 | 1.6  | 0.7    | Flat |
| COOH           | t-Bu               | <i>para</i>  | BONLOF                   | 8.5   | 10.3  | -171.0 | -173.2                    | 8.5   | 10.3  | 9.0   | 6.8                       | 1.7 | 0.5 | 1.7  | 1.3    | Flat |
| COOH           | F                  | <i>ortho</i> | FBENZA02                 | -9.8  | -10.4 | 170.7  | 169.1                     | -9.8  | -10.4 | -9.3  | -10.9                     | 0.6 | 0.5 | 1.1  | 0.7    | Flat |
| COOH           | F                  | <i>meta</i>  | COVJIG                   | -5.0  | -6.7  | 174.7  | 173.6                     | -5.0  | -6.7  | -5.3  | -6.4                      | 1.7 | 0.3 | 1.4  | 1.2    | Flat |
| COOH           | F                  | <i>para</i>  | PFBAZAD01                | -6.1  | -6.5  | 174.0  | 173.4                     | -6.1  | -6.5  | -6.0  | -6.6                      | 0.4 | 0.1 | 0.5  | 0.3    | Flat |
| COOH           | Cl                 | <i>ortho</i> | CLBZAC01                 | -14.6 | -14.4 | 167.4  | 163.7                     | -14.6 | -14.4 | -12.6 | -16.3                     | 0.2 | 1.9 | 1.8  | 1.3    | Flat |
| COOH           | Cl                 | <i>meta</i>  | MCBZAC                   | 2.1   | -1.2  | -179.3 | -179.9                    | 2.1   | -1.2  | 0.7   | 0.1                       | 3.3 | 1.4 | 2.0  | 2.2    | Flat |
| COOH           | Cl                 | <i>para</i>  | CLBZAP01                 | -5.0  | -6.1  | 175.3  | 173.6                     | -5.0  | -6.1  | -4.7  | -6.4                      | 1.1 | 0.3 | 1.4  | 0.9    | Flat |
| COOH           | Br                 | <i>meta</i>  | BRBZAC                   | -19.5 | -16.4 | 162.9  | 161.2                     | -19.5 | -16.4 | -17.1 | -18.8                     | 3.1 | 2.4 | 0.7  | 2.0    | Flat |
| COOH           | Br                 | <i>para</i>  | BRBZAP                   | 6.5   | 3.8   | -175.4 | -174.3                    | 6.5   | 3.8   | 4.6   | 5.7                       | 2.8 | 2.0 | 0.8  | 1.9    | Flat |
| COOH           | CF <sub>3</sub>    | <i>ortho</i> | UNUZIN                   | 16.7  | 16.4  | -164.4 | -162.5                    | 16.7  | 16.4  | 15.6  | 17.5                      | 0.3 | 1.1 | 0.8  | 0.7    | Flat |
| COOH           | CN                 | <i>para</i>  | TAGNAR                   | 7.7   | 7.2   | -173.1 | -171.9                    | 7.7   | 7.2   | 6.9   | 8.1                       | 0.5 | 0.8 | 0.4  | 0.6    | Flat |
| COOH           | NH <sub>2</sub>    | <i>ortho</i> | AMBAC008                 | 3.2   | 3.1   | -177.4 | -176.4                    | 3.2   | 3.1   | 2.6   | 3.6                       | 0.1 | 0.6 | 0.4  | 0.4    | Flat |
| COOH           | NH <sub>2</sub>    | <i>meta</i>  | AMBZAC                   | -7.9  | -7.0  | 172.9  | 172.2                     | -7.9  | -7.0  | -7.1  | -7.8                      | 1.0 | 0.8 | 0.1  | 0.7    | Flat |
| COOH           | NH <sub>2</sub>    | <i>para</i>  | AMBNAC04                 | 10.4  | 9.3   | -170.2 | -170.1                    | 10.4  | 9.3   | 9.8   | 9.9                       | 1.1 | 0.6 | 0.5  | 0.7    | Flat |
| COOH           | OH                 | <i>ortho</i> | SALIAC                   | 0.5   | 1.1   | 178.8  | 179.6                     | 0.5   | 1.1   | -1.2  | -0.4                      | 0.7 | 1.6 | 0.9  | 1.1    | Flat |
| COOH           | OH                 | <i>meta</i>  | BIODLOP                  | -1.1  | -0.1  | 179.2  | 179.6                     | -1.1  | -0.1  | -0.8  | -0.4                      | 1.0 | 0.3 | 0.7  | 0.7    | Flat |
| COOH           | OMe                | <i>ortho</i> | FUFBOX                   | 4.3   | 5.9   | -174.8 | -175.0                    | 4.3   | 5.9   | 5.2   | 5.0                       | 1.6 | 0.9 | 0.7  | 1.1    | Flat |
| COOH           | OMe                | <i>para</i>  | ANISIC02                 | 2.3   | 1.2   | -176.3 | -179.8                    | 2.3   | 1.2   | 3.7   | 0.2                       | 1.0 | 1.5 | 2.1  | 1.5    | Flat |
| COOH           | SO <sub>2</sub> Me | <i>para</i>  | COBFUU                   | 4.9   | 5.5   | -174.6 | -175.9                    | 4.9   | 5.5   | 5.4   | 4.1                       | 0.6 | 0.5 | 0.9  | 0.6    | Flat |
| COOH           | Ph                 | <i>ortho</i> | NOZVIH                   | -50.2 | -49.6 | 130.8  | 129.4                     | -50.2 | -49.6 | -49.2 | -50.6                     | 0.6 | 1.0 | 0.3  | 0.7    | Flat |
| COOH           | Ph                 | <i>meta</i>  | TEJMAW                   | -1.3  | -2.6  | 176.9  | 179.3                     | -1.3  | -2.6  | -3.1  | -0.7                      | 1.2 | 1.8 | 0.6  | 1.2    | Flat |
| COOH           | Ph                 | <i>para</i>  | BOPSEE11                 | 4.1   | 5.4   | -173.3 | -177.3                    | 4.1   | 5.4   | 6.8   | 2.7                       | 1.3 | 2.7 | 1.4  | 1.8    | Flat |
| COOH           | COOH               | <i>ortho</i> | PHTHAC01                 | -33.7 | -30.2 | 154.2  | 141.8                     | -33.7 | -30.2 | -25.8 | -38.2                     | 3.5 | 7.9 | 4.5  | 5.3    | Flat |
| COOH           | COOH               | <i>meta</i>  | BENZDC01                 | -4.3  | -4.2  | 175.3  | 176.2                     | -4.3  | -4.2  | -4.7  | -3.8                      | 0.1 | 0.4 | 0.5  | 0.3    | Flat |
| COOH           | COOH               | <i>para</i>  | TEPPTH                   | 5.2   | 5.2   | -175.4 | -174.2                    | 5.2   | 5.2   | 4.6   | 5.8                       | 0.0 | 0.6 | 0.6  | 0.4    | Flat |
| COOH           | Ac                 | <i>meta</i>  | QUYREI                   | -2.4  | -3.2  | 176.2  | 178.2                     | -2.4  | -3.2  | -3.8  | -1.8                      | 0.8 | 1.4 | 0.6  | 0.9    | Flat |
| COOH           | Ac                 | <i>para</i>  | TIHLIG                   | 0.4   | 0.4   | 179.8  | 179.8                     | 0.4   | 0.4   | -0.2  | -0.2                      | 0.0 | 0.6 | 0.6  | 0.4    | Flat |
| COOH           | NO <sub>2</sub>    | <i>ortho</i> | NBZAO02                  | 53.9  | 53.1  | -129.3 | -123.7                    | 53.9  | 53.1  | 50.7  | 56.3                      | 0.8 | 3.2 | 2.4  | 2.2    | Flat |
| COOH           | NO <sub>2</sub>    | <i>meta</i>  | MNBZAC01                 | -4.8  | -3.0  | 176.7  | 175.5                     | -4.8  | -3.0  | -3.3  | -4.5                      | 1.7 | 1.5 | 0.2  | 1.1    | Flat |
| COOH           | NO <sub>2</sub>    | <i>para</i>  | NBZAC03                  | -1.2  | -1.7  | 178.2  | 179.0                     | -1.2  | -1.7  | -1.8  | -1.0                      | 0.5 | 0.6 | 0.2  | 0.4    | Flat |
| COOH           | NMe <sub>2</sub>   | <i>meta</i>  | TACGUZ                   | -0.4  | -2.0  | 178.1  | 179.5                     | -0.4  | -2.0  | -1.9  | -0.5                      | 1.6 | 1.5 | 0.1  | 1.1    | Flat |
| COOH           | NMe <sub>2</sub>   | <i>para</i>  | PDABZA01                 | 4.0   | 3.6   | -176.8 | -175.7                    | 4.0   | 3.6   | 3.2   | 4.3                       | 0.4 | 0.8 | 0.3  | 0.5    | Flat |
| COOH           | NHAc               | <i>ortho</i> | ACANAC12                 | -3.5  | -4.5  | 175.3  | 176.7                     | -3.5  | -4.5  | -4.8  | -3.3                      | 1.0 | 1.2 | 0.2  | 0.8    | Flat |
| COOH           | NHAc               | <i>meta</i>  | VIDLUQ                   | 6.4   | 7.2   | -175.9 | -170.3                    | 6.4   | 7.2   | 4.1   | 9.7                       | 0.8 | 2.3 | 3.3  | 2.1    | Flat |
| COOH           | NHAc               | <i>para</i>  | DIXFAR02                 | 5.5   | 5.2   | -174.7 | -174.6                    | 5.5   | 5.2   | 5.3   | 5.4                       | 0.3 | 0.1 | 0.1  | 0.2    | Flat |
| Ac             | H                  | -            | ACETPH                   | -3.0  | -3.8  | 175.6  | 177.7                     | -3.0  | -3.8  | -4.4  | -2.3                      | 0.9 | 1.5 | 0.6  | 1.0    | Flat |
| Ac             | Cl                 | <i>para</i>  | EYISIO                   | -3.8  | -4.5  | 175.6  | 176.0                     | -3.8  | -4.5  | -4.4  | -4.0                      | 0.7 | 0.6 | 0.1  | 0.5    | Flat |
| Ac             | Br                 | <i>para</i>  | BRACPH02                 | 8.9   | 9.1   | -172.1 | -170.0                    | 8.9   | 9.1   | 7.9   | 10.0                      | 0.1 | 1.0 | 1.1  | 0.7    | Flat |
| Ac             | NH <sub>2</sub>    | <i>para</i>  | AMACPH                   | -4.2  | -3.0  | 175.3  | 177.6                     | -4.2  | -3.0  | -4.7  | -2.4                      | 1.3 | 0.5 | 1.8  | 1.2    | Flat |
| Ac             | OH                 | <i>para</i>  | HACTPH12                 | -1.9  | -1.1  | 177.9  | 179.1                     | -1.9  | -1.1  | -2.1  | -0.9                      | 0.8 | 0.2 | 1.0  | 0.7    | Flat |
| Ac             | OMe                | <i>para</i>  | YAJIOJ                   | 1.4   | 2.3   | -179.5 | -176.8                    | 1.4   | 2.3   | 0.6   | 3.2                       | 0.9 | 0.8 | 1.8  | 1.2    | Flat |
| Ac             | COOH               | <i>meta</i>  | QUYREI                   | 4.0   | 4.5   | -175.4 | -176.0                    | 4.0   | 4.5   | 4.6   | 4.0                       | 0.5 | 0.5 | 0.1  | 0.4    | Flat |
| Ac             | COOH               | <i>para</i>  | TIHLIG                   | -7.2  | -5.9  | 174.7  | 172.3                     | -7.2  | -5.9  | -5.3  | -7.7                      | 1.4 | 2.0 | 0.5  | 1.3    | Flat |
| Ac             | Ac                 | <i>para</i>  | MEGWUR                   | -1.3  | -1.6  | 177.7  | 179.4                     | -1.3  | -1.6  | -2.3  | -0.6                      | 0.3 | 1.0 | 0.7  | 0.6    | Flat |
| Ac             | NO <sub>2</sub>    | <i>meta</i>  | HIHHAH                   | 8.0   | 10.8  | -170.7 | -170.6                    | 8.0   | 10.8  | 9.3   | 9.4                       | 2.8 | 1.4 | 1.4  | 1.9    | Flat |
| Ac             | NO <sub>2</sub>    | <i>para</i>  | NACPON10                 | -1.4  | -2.5  | 177.5  | 178.6                     | -1.4  | -2.5  | -2.6  | -1.4                      | 1.0 | 1.1 | 0.1  | 0.7    | Flat |
| Ac             | NHAc               | <i>para</i>  | ODATUJ                   | 4.5   | 3.1   | -175.7 | -176.8                    | 4.5   | 3.1   | 4.3   | 3.2                       | 1.4 | 0.1 | 1.3  | 0.9    | Flat |

|                 |                                 |       |           |       |       |        |        |       |       |       |       |      |      |       |      |      |
|-----------------|---------------------------------|-------|-----------|-------|-------|--------|--------|-------|-------|-------|-------|------|------|-------|------|------|
| NO <sub>2</sub> | H                               | -     | NITRBE01  | 1.7   | 2.6   | -177.5 | -178.2 | 1.7   | 2.6   | 2.5   | 1.8   | 0.9  | 0.8  | 0.1   | 0.6  | Flat |
| NO <sub>2</sub> | Me                              | meta  | MOVAV01   | -5.4  | -4.0  | 176.7  | 173.9  | -5.4  | -4.0  | -3.3  | -6.1  | 1.5  | 2.2  | 0.7   | 1.4  | Flat |
| NO <sub>2</sub> | Me                              | para  | NITOLU01  | -0.9  | -1.1  | 179.1  | 178.8  | -0.9  | -1.1  | -0.9  | -1.2  | 0.2  | 0.1  | 0.3   | 0.2  | Flat |
| NO <sub>2</sub> | Cl                              | meta  | SETVIX    | -39.3 | -43.5 | 141.0  | 136.2  | -39.3 | -43.5 | -39.0 | -43.8 | 4.2  | 0.3  | 4.5   | 3.0  | Flat |
| NO <sub>2</sub> | Cl                              | meta  | CLNIBZ01  | 2.9   | 3.1   | -177.4 | -176.7 | 2.9   | 3.1   | 2.6   | 3.3   | 0.2  | 0.3  | 0.5   | 0.3  | Flat |
| NO <sub>2</sub> | Cl                              | para  | CNITBZ01  | 0.0   | 0.4   | -178.7 | 179.1  | 0.0   | 0.4   | 1.3   | -0.9  | 0.4  | 1.3  | 0.9   | 0.9  | Flat |
| NO <sub>2</sub> | Br                              | ortho | YAQZUM    | -45.3 | -44.4 | 134.1  | 136.3  | -45.3 | -44.4 | -45.9 | -43.8 | 0.9  | 0.6  | 1.5   | 1.0  | Flat |
| NO <sub>2</sub> | Br                              | meta  | BRNIBZ    | -0.8  | 2.4   | 177.3  | 175.7  | -0.8  | 2.4   | -2.7  | -4.3  | 3.2  | 1.9  | 3.5   | 2.9  | Flat |
| NO <sub>2</sub> | Br                              | para  | ULEBOD    | 4.1   | 6.3   | -175.4 | -174.3 | 4.1   | 6.3   | 4.6   | 5.7   | 2.2  | 0.5  | 1.6   | 1.5  | Flat |
| NO <sub>2</sub> | NH <sub>2</sub>                 | ortho | ONITAN    | -0.7  | -4.0  | 176.5  | 178.9  | -0.7  | -4.0  | -3.5  | -1.1  | 3.3  | 2.9  | 0.5   | 2.2  | Flat |
| NO <sub>2</sub> | NH <sub>2</sub>                 | meta  | MINANL02  | -2.7  | -2.5  | 178.0  | 176.9  | -2.7  | -2.5  | -2.1  | -3.1  | 0.2  | 0.6  | 0.5   | 0.4  | Flat |
| NO <sub>2</sub> | NH <sub>2</sub>                 | para  | NANILI    | -2.6  | -1.3  | 178.0  | 178.2  | -2.6  | -1.3  | -2.0  | -1.8  | 1.3  | 0.6  | 0.7   | 0.9  | Flat |
| NO <sub>2</sub> | OH                              | ortho | ONITPH    | 1.6   | 0.7   | -177.9 | -179.8 | 1.6   | 0.7   | 2.1   | 0.2   | 0.9  | 0.5  | 1.4   | 0.9  | Flat |
| NO <sub>2</sub> | OH                              | meta  | MNPHOL02  | 0.9   | -0.3  | 179.9  | 179.3  | 0.9   | -0.3  | -0.1  | -0.8  | 1.2  | 1.0  | 1.7   | 1.3  | Flat |
| NO <sub>2</sub> | OH                              | para  | NITPOL03  | -1.6  | -1.0  | 178.3  | 179.1  | -1.6  | -1.0  | -1.7  | -0.9  | 0.5  | 0.1  | 0.7   | 0.4  | Flat |
| NO <sub>2</sub> | SO <sub>2</sub> NH <sub>2</sub> | ortho | TIBPAW    | -47.6 | -47.8 | 133.1  | 131.5  | -47.6 | -47.8 | -46.9 | -48.5 | 0.3  | 0.7  | 0.9   | 0.6  | Flat |
| NO <sub>2</sub> | SO <sub>2</sub> NH <sub>2</sub> | meta  | XUDTEV    | -34.9 | 20.0  | 158.2  | -173.1 | -34.9 | 20.0  | -21.8 | 6.9   | 54.9 | 13.1 | 41.8  | 36.6 | Not  |
| NO <sub>2</sub> | SO <sub>2</sub> NH <sub>2</sub> | para  | XUDTIZ01  | -0.9  | -1.9  | 178.8  | 178.4  | -0.9  | -1.9  | -1.2  | -1.6  | 1.0  | 0.3  | 0.7   | 0.6  | Flat |
| NO <sub>2</sub> | SO <sub>2</sub> Me              | para  | VOHZUO    | 9.7   | 10.4  | -169.9 | -170.0 | 9.7   | 10.4  | 10.1  | 10.0  | 0.7  | 0.4  | 0.3   | 0.4  | Flat |
| NO <sub>2</sub> | Ph                              | ortho | LESYEN    | -44.9 | -44.2 | 133.8  | 137.2  | -44.9 | -44.2 | -46.2 | -42.8 | 0.7  | 1.4  | 2.1   | 1.4  | Flat |
| NO <sub>2</sub> | Ph                              | meta  | ZENKIM    | -6.4  | -8.0  | 172.2  | 173.3  | -6.4  | -8.0  | -7.8  | -6.7  | 1.6  | 1.3  | 0.2   | 1.0  | Flat |
| NO <sub>2</sub> | Ph                              | para  | NBPHEN    | -0.2  | -2.4  | 179.4  | 178.1  | -0.2  | -2.4  | -0.6  | -1.9  | 2.2  | 0.4  | 1.7   | 1.4  | Flat |
| NO <sub>2</sub> | COOH                            | ortho | NBZAO02   | 53.9  | 53.1  | -123.7 | -129.3 | 53.9  | 53.1  | 56.3  | 50.7  | 0.8  | 2.4  | 3.2   | 2.2  | Flat |
| NO <sub>2</sub> | COOH                            | meta  | MNBZAC01  | 2.2   | 2.8   | -177.3 | -177.8 | 2.2   | 2.8   | 2.7   | 2.2   | 0.6  | 0.5  | 0.0   | 0.4  | Flat |
| NO <sub>2</sub> | COOH                            | para  | NBZAO03   | -13.9 | -13.2 | 166.4  | 166.5  | -13.9 | -13.2 | -13.6 | -13.5 | 0.7  | 0.3  | 0.4   | 0.5  | Flat |
| NO <sub>2</sub> | Ac                              | para  | HIHHAH    | 10.8  | 8.0   | -170.7 | -170.6 | 10.8  | 8.0   | 9.3   | 9.4   | 2.8  | 1.4  | 1.4   | 1.9  | Flat |
| NO <sub>2</sub> | NO <sub>2</sub>                 | ortho | ZZZZFYW01 | 41.8  | 40.5  | -135.4 | -142.4 | 41.8  | 40.5  | 44.6  | 37.7  | 1.3  | 2.9  | 4.1   | 2.7  | Flat |
| NO <sub>2</sub> | NO <sub>2</sub>                 | meta  | DNBENZ11  | 12.7  | 11.8  | -167.7 | -167.8 | 12.7  | 11.8  | 12.3  | 12.2  | 0.8  | 0.4  | 0.5   | 0.6  | Flat |
| NO <sub>2</sub> | NO <sub>2</sub>                 | para  | DNITBZ    | -10.8 | -12.1 | 170.8  | 166.3  | -10.8 | -12.1 | -9.2  | -13.7 | 1.2  | 1.7  | 2.9   | 1.9  | Flat |
| NO <sub>2</sub> | NMe <sub>2</sub>                | meta  | MNTDMA    | -9.0  | -11.4 | 170.0  | 169.5  | -9.0  | -11.4 | -10.0 | -10.5 | 2.4  | 1.0  | 1.4   | 1.6  | Flat |
| NO <sub>2</sub> | NMe <sub>2</sub>                | para  | DIMNAN    | 0.3   | 5.6   | -176.4 | -177.7 | 0.3   | 5.6   | 3.6   | 2.3   | 5.3  | 3.3  | 2.0   | 3.5  | Flat |
| NO <sub>2</sub> | CONH <sub>2</sub>               | ortho | ONBZAM    | 44.2  | 46.7  | -131.4 | -137.8 | 44.2  | 46.7  | 48.6  | 42.2  | 2.6  | 4.5  | 1.9   | 3.0  | Flat |
| NO <sub>2</sub> | CONH <sub>2</sub>               | meta  | JACYOB    | 9.0   | 9.8   | -171.7 | -169.5 | 9.0   | 9.8   | 8.3   | 10.5  | 0.8  | 0.8  | 1.5   | 1.0  | Flat |
| NO <sub>2</sub> | CONH <sub>2</sub>               | para  | NITBZAM01 | -7.7  | -7.9  | 172.6  | 171.8  | -7.7  | -7.9  | -7.4  | -8.2  | 0.2  | 0.3  | 0.5   | 0.3  | Flat |
| NO <sub>2</sub> | NHAc                            | ortho | DIXDUJ    | -19.7 | -18.2 | 161.1  | 161.0  | -19.7 | -18.2 | -18.9 | -19.1 | 1.5  | 0.8  | 0.7   | 1.0  | Flat |
| NO <sub>2</sub> | NHAc                            | para  | UGUHEJ    | -2.0  | -1.1  | 178.2  | 178.8  | -2.0  | -1.1  | -1.8  | -1.2  | 0.9  | 0.2  | 0.8   | 0.6  | Flat |
| NH <sub>2</sub> | H                               | -     | BAZGOY    | 28.5  | -19.0 | 166.2  | -166.6 | 28.5  | -19.0 | -13.8 | 23.4  | 47.5 | 42.4 | 5.2   | 31.7 | Not  |
| NH <sub>2</sub> | Me                              | para  | FANDOO    | -19.0 | -30.1 | 157.9  | 153.1  | -19.0 | -30.1 | -22.1 | -26.9 | 11.1 | 3.2  | 7.9   | 7.4  | Flat |
| NH <sub>2</sub> | F                               | para  | IDAHRU    | -29.2 | 21.8  | -161.6 | 154.2  | -29.2 | 21.8  | 18.4  | -25.8 | 50.9 | 47.6 | 3.3   | 33.9 | Not  |
| NH <sub>2</sub> | Cl                              | ortho | IGEHEI    | 0.0   | -1.5  | 180.0  | 178.6  | 0.0   | -1.5  | 0.0   | -1.4  | 1.5  | 0.1  | 1.4   | 1.0  | Flat |
| NH <sub>2</sub> | Cl                              | para  | CLANIC    | 31.7  | -31.6 | -165.8 | 165.8  | 31.7  | -31.6 | 14.2  | -14.2 | 63.3 | 17.4 | 45.9  | 42.2 | Not  |
| NH <sub>2</sub> | Br                              | ortho | IGEHEI    | -20.0 | 24.2  | 163.2  | -159.1 | -20.0 | 24.2  | -16.8 | 20.9  | 44.2 | 3.3  | 41.0  | 29.5 | Not  |
| NH <sub>2</sub> | Br                              | para  | PBRANL01  | 16.9  | -16.9 | 166.5  | -166.5 | 16.9  | -16.9 | -13.5 | 13.5  | 33.7 | 30.4 | 3.4   | 22.5 | Not  |
| NH <sub>2</sub> | CN                              | ortho | NAHQOC    | -16.0 | 14.9  | 165.4  | -66.6  | -16.0 | 14.9  | -14.6 | 113.4 | 30.9 | 1.4  | 129.4 | 53.9 | Not  |
| NH <sub>2</sub> | CN                              | meta  | BERTIB    | 30.2  | -33.0 | 150.9  | -153.7 | 30.2  | -33.0 | -29.1 | 26.4  | 63.2 | 59.3 | 3.9   | 42.1 | Not  |
| NH <sub>2</sub> | CN                              | para  | BERTOJ    | -4.9  | 2.8   | 174.7  | -176.6 | -4.9  | 2.8   | -5.3  | 3.4   | 7.8  | 0.4  | 8.4   | 5.5  | Flat |
| NH <sub>2</sub> | NH <sub>2</sub>                 | ortho | BAGFIY    | 11.0  | -44.7 | 137.9  | -171.5 | 11.0  | -44.7 | -42.1 | 8.5   | 55.6 | 53.1 | 2.5   | 37.1 | Not  |
| NH <sub>2</sub> | NH <sub>2</sub>                 | meta  | PENDAM02  | 24.8  | -27.9 | 156.4  | -159.5 | 24.8  | -27.9 | -23.6 | 20.5  | 52.7 | 48.4 | 4.3   | 35.1 | Not  |
| NH <sub>2</sub> | NH <sub>2</sub>                 | para  | VOJGIL    | 23.3  | -35.3 | 149.3  | -161.3 | 23.3  | -35.3 | -30.7 | 18.8  | 58.6 | 54.0 | 4.6   | 39.1 | Not  |
| NH <sub>2</sub> | OH                              | ortho | AMPHOM03  | 15.3  | -44.7 | 139.9  | -169.3 | 15.3  | -44.7 | -40.1 | 10.7  | 60.0 | 55.4 | 4.6   | 40.0 | Not  |
| NH <sub>2</sub> | OH                              | meta  | MAMPOL    | 32.6  | -40.5 | -151.6 | 143.7  | 32.6  | -40.5 | 28.4  | -36.4 | 73.2 | 4.2  | 69.0  | 48.8 | Not  |
| NH <sub>2</sub> | OH                              | para  | AMPHOL01  | -13.9 | 47.9  | -134.5 | 188.6  | -13.9 | 47.9  | 45.5  | -11.4 | 61.8 | 59.4 | 2.4   | 41.2 | Not  |
| NH <sub>2</sub> | OMe                             | para  | PANISD01  | 18.9  | -28.4 | 154.1  | -163.6 | 18.9  | -28.4 | -25.9 | 16.4  | 47.3 | 44.8 | 2.5   | 31.5 | Not  |
| NH <sub>2</sub> | SO <sub>2</sub> NH <sub>2</sub> | para  | SULAMD03  | 7.3   | -32.7 | -173.0 | 147.6  | 7.3   | -32.7 | 7.0   | -32.4 | 39.9 | 0.3  | 39.7  | 26.6 | Not  |
| NH <sub>2</sub> | COOH                            | meta  | AMBANZA   | -18.0 | 17.6  | -165.5 | 165.1  | -18.0 | 17.6  | 14.5  | -14.9 | 35.6 | 32.5 | 3.1   | 23.7 | Not  |
| NH <sub>2</sub> | COOH                            | ortho | AMBACO08  | 9.2   | -14.6 | 167.7  | -73.2  | 9.2   | -14.6 | -12.3 | 106.8 | 23.8 | 21.5 | 97.6  | 47.6 | Not  |
| NH <sub>2</sub> | COOH                            | para  | AMBNAC04  | -32.9 | 26.8  | -157.5 | 151.4  | -32.9 | 26.8  | 22.5  | -28.6 | 59.8 | 55.4 | 4.4   | 39.9 | Not  |
| NH <sub>2</sub> | Ac                              | para  | AMACPH    | 25.9  | -19.0 | 163.7  | -156.9 | 25.9  | -19.0 | -16.3 | 23.1  | 44.9 | 42.2 | 2.8   | 39.3 | Not  |
| NH <sub>2</sub> | NO <sub>2</sub>                 | ortho | ONITAN    | 12.8  | 15.8  | -165.7 | -165.7 | 12.8  | 15.8  | 14.3  | 14.4  | 3.0  | 1.5  | 1.5   | 2.0  | Flat |
| NH <sub>2</sub> | NO <sub>2</sub>                 | meta  | MINANL02  | 23.4  | -20.8 | 162.1  | -159.6 | 23.4  | -20.8 | -17.9 | 20.4  | 44.2 | 41.3 | 3.0   | 29.5 | Not  |
| NH <sub>2</sub> | NO <sub>2</sub>                 | para  | NANILI    | 13.9  | 18.8  | -160.9 | -166.4 | 13.9  | 18.8  | 19.1  | 13.6  | 4.9  | 5.2  | 0.3   | 3.4  | Flat |
| NH <sub>2</sub> | NMe <sub>2</sub>                | para  | GILYOP    | 27.1  | -27.1 | 155.5  | -155.6 | 27.1  | -27.1 | -24.5 | 24.4  | 54.3 | 51.6 | 2.8   | 36.2 | Not  |
| NH <sub>2</sub> | CONH <sub>2</sub>               | ortho | JIXCIC    | -18.8 | 39.8  | -141.8 | 162.8  | -18.8 | 39.8  | 38.3  | -17.2 | 58.7 | 57.1 | 1.6   | 39.1 | Not  |
| NH <sub>2</sub> | CONH <sub>2</sub>               | para  | AMBZAM10  | -47.7 | -18.9 | 133.2  | 160.2  | -47.7 | -18.9 | -46.8 | -19.8 | 28.7 | 0.8  | 27.9  | 19.1 | Not  |
| NH <sub>2</sub> | NHAc                            | para  | PACTAN    | -25.4 | 33.4  | -149.1 | 157.0  | -25.4 | 33.4  | 30.9  | -23.0 | 58.8 | 56.4 | 2.4   | 39.1 | Not  |

|                                 |                                |              |          |       |       |        |        |       |       |       |       |       |      |       |      |      |
|---------------------------------|--------------------------------|--------------|----------|-------|-------|--------|--------|-------|-------|-------|-------|-------|------|-------|------|------|
| NMe <sub>2</sub>                | NH <sub>2</sub>                | <i>para</i>  | GILYOP   | 2.1   | 53.4  | -129.4 | -175.2 | 2.1   | 53.4  | 50.6  | 4.8   | 51.3  | 48.5 | 2.8   | 34.2 | Not  |
| NMe <sub>2</sub>                | CN                             | <i>para</i>  | YAMHID   | -5.3  | 6.2   | 173.1  | -173.9 | -5.3  | 6.2   | -6.9  | 6.1   | 11.5  | 1.6  | 11.4  | 8.1  | Flat |
| NMe <sub>2</sub>                | COOH                           | <i>meta</i>  | TACGUZ   | -11.5 | 12.0  | -170.5 | 171.0  | -11.5 | 12.0  | 9.5   | -9.0  | 23.4  | 21.0 | 2.5   | 15.6 | Not  |
| NMe <sub>2</sub>                | COOH                           | <i>para</i>  | PDABZA01 | -2.6  | -2.9  | 176.7  | 177.8  | -2.6  | -2.9  | -3.3  | -2.2  | 0.3   | 0.7  | 0.4   | 0.4  | Flat |
| NMe <sub>2</sub>                | COOH                           | <i>para</i>  | PDABZA02 | -5.0  | 9.7   | -170.2 | 174.9  | -5.0  | 9.7   | 9.8   | -5.1  | 14.7  | 14.8 | 0.1   | 9.9  | Flat |
| NMe <sub>2</sub>                | NO <sub>2</sub>                | <i>meta</i>  | MNTDMA   | 7.5   | -3.7  | -174.0 | 177.7  | 7.5   | -3.7  | 6.0   | -2.3  | 11.2  | 1.4  | 9.8   | 7.5  | Flat |
| NMe <sub>2</sub>                | NO <sub>2</sub>                | <i>para</i>  | DIMNAN   | -6.4  | -7.3  | 175.1  | 171.3  | -6.4  | -7.3  | -4.9  | -8.7  | 0.9   | 1.4  | 2.4   | 1.6  | Flat |
| NMe <sub>2</sub>                | NHAc                           | <i>para</i>  | PAVJEC   | -4.6  | 7.0   | 177.4  | -175.0 | -4.6  | 7.0   | -2.6  | 5.0   | 11.6  | 2.0  | 9.6   | 7.8  | Flat |
| NMe <sub>2</sub>                | COOEt                          | <i>para</i>  | DUNHIE   | -3.2  | -1.0  | 177.2  | 178.5  | -3.2  | -1.0  | -2.8  | -1.5  | 2.2   | 0.4  | 1.7   | 1.5  | Flat |
| NMe <sub>2</sub>                | COH                            | <i>para</i>  | EVAXUV   | -0.7  | 3.1   | -179.8 | -177.8 | -0.7  | 3.1   | 0.2   | 2.3   | 3.8   | 0.9  | 2.9   | 2.5  | Flat |
| NMe <sub>2</sub>                | COH                            | <i>para</i>  | CIKCEF   | -1.3  | 3.3   | 179.3  | -177.3 | -1.3  | 3.3   | -0.7  | 2.7   | 4.7   | 0.6  | 4.1   | 3.1  | Flat |
| NMe <sub>2</sub>                | COH                            | <i>para</i>  | HUMYOE   | 0.2   | -0.6  | 179.8  | 179.9  | 0.2   | -0.6  | -0.2  | 0.3   | 0.7   | 0.4  | 0.3   | 0.5  | Flat |
| NMe <sub>2</sub>                | COH                            | <i>para</i>  | ISACOV   | 4.5   | -3.6  | -176.1 | 177.0  | 4.5   | -3.6  | 3.9   | -3.0  | 8.0   | 0.5  | 7.5   | 5.3  | Flat |
| NMe <sub>2</sub>                | 2-hydroxyphenoxyethyl          | <i>para</i>  | ISACOV   | -5.0  | 2.9   | -177.0 | 175.0  | -5.0  | 2.9   | 3.0   | -5.0  | 7.9   | 8.0  | 0.1   | 5.3  | Flat |
| NMe <sub>2</sub>                | dimethylaminophenyl            | <i>ortho</i> | KAHRAM   | -11.7 | -61.8 | 120.2  | 166.4  | -11.7 | -61.8 | -59.9 | -13.6 | 50.1  | 48.2 | 1.9   | 33.4 | Not  |
| NMe <sub>2</sub>                | benzoyl                        | <i>para</i>  | KOFHET   | 7.8   | -1.9  | -172.1 | 178.0  | 7.8   | -1.9  | 7.9   | -2.0  | 9.7   | 0.1  | 9.8   | 6.6  | Flat |
| NMe <sub>2</sub>                | thiazolidin-2-yl               | <i>para</i>  | KONXOA   | 5.7   | -13.8 | 167.1  | -175.3 | 5.7   | -13.8 | -12.9 | 4.7   | 19.5  | 18.6 | 0.9   | 13.0 | Not  |
| NMe <sub>2</sub>                | naphthalen-1-yl                | <i>para</i>  | OJUBAX   | 5.0   | -10.0 | 171.2  | -176.1 | 5.0   | -10.0 | -8.8  | 3.9   | 15.1  | 13.9 | 1.2   | 10.0 | Not  |
| NMe <sub>2</sub>                | phthalimido                    | <i>para</i>  | ZZZAWP10 | -7.0  | -7.0  | 173.0  | 173.0  | -7.0  | -7.0  | -7.0  | -7.0  | 0.0   | 0.0  | 0.0   | 0.0  | Flat |
| NMe <sub>2</sub>                | A                              | <i>para</i>  | FAXSUT   | -15.0 | 13.7  | 166.2  | -167.5 | -15.0 | 13.7  | -13.8 | 12.5  | 28.8  | 1.2  | 27.6  | 19.2 | Not  |
| NMe <sub>2</sub>                | B                              | <i>para</i>  | HIVNEG   | 4.3   | 1.4   | -179.0 | -175.3 | 4.3   | 1.4   | 1.0   | 4.8   | 2.9   | 3.3  | 0.4   | 2.2  | Flat |
| N <sup>+</sup> HMe <sub>2</sub> | H                              | <i>para</i>  | GEBYER   | 65.3  | -60.2 | -114.7 | 119.8  | 65.3  | -60.2 | 65.3  | -60.2 | 125.5 | 0.0  | 125.5 | 83.7 | Not  |
| N <sup>+</sup> HMe <sub>2</sub> | Br                             | <i>para</i>  | AFUXUU   | -60.1 | -4.1  | 122.3  | 173.5  | -60.1 | -4.1  | -57.7 | -6.5  | 56.0  | 2.4  | 53.6  | 37.3 | Not  |
| N <sup>+</sup> HMe <sub>2</sub> | COH                            | <i>para</i>  | VOJMED   | 63.7  | -62.6 | -117.8 | 115.8  | 63.7  | -62.6 | 62.2  | -64.2 | 126.3 | 1.6  | 127.9 | 85.3 | Not  |
| NMe <sub>2</sub>                | N <sup>+</sup> Me <sub>3</sub> | <i>para</i>  | YIMKAH   | -3.9  | -13.2 | 167.7  | 175.3  | -3.9  | -13.2 | -12.4 | -4.7  | 9.2   | 8.4  | 0.8   | 6.1  | Flat |
| CONH <sub>2</sub>               | H                              | -            | BZAMID   | -26.6 | -24.2 | 153.7  | 155.5  | -26.6 | -24.2 | -26.3 | -24.6 | 2.4   | 0.3  | 2.0   | 1.6  | Flat |
| CONH <sub>2</sub>               | Me                             | <i>ortho</i> | NABQEM   | 40.0  | 42.0  | -138.3 | -139.7 | 40.0  | 42.0  | 41.7  | 40.3  | 2.0   | 1.7  | 0.3   | 1.3  | Flat |
| CONH <sub>2</sub>               | Me                             | <i>meta</i>  | MEBENA   | 29.9  | 26.6  | -152.3 | -151.2 | 29.9  | 26.6  | 27.7  | 28.8  | 3.3   | 2.2  | 1.1   | 2.2  | Flat |
| CONH <sub>2</sub>               | Me                             | <i>para</i>  | DABVAD01 | 24.6  | 27.0  | -152.2 | -156.3 | 24.6  | 27.0  | 27.8  | 23.8  | 2.4   | 3.2  | 0.9   | 2.1  | Flat |
| CONH <sub>2</sub>               | F                              | <i>ortho</i> | BIGSUF   | -30.2 | -31.8 | 149.0  | 148.9  | -30.2 | -31.8 | -31.0 | -31.1 | 1.6   | 0.7  | 0.8   | 1.0  | Flat |
| CONH <sub>2</sub>               | F                              | <i>meta</i>  | BENAFM10 | -29.5 | -27.9 | 150.2  | 152.4  | -29.5 | -27.9 | -29.8 | -27.6 | 1.6   | 0.3  | 1.9   | 1.2  | Flat |
| CONH <sub>2</sub>               | F                              | <i>para</i>  | BENAFP01 | -29.1 | -26.7 | 150.4  | 153.8  | -29.1 | -26.7 | -29.6 | -26.2 | 2.4   | 0.5  | 2.9   | 1.9  | Flat |
| CONH <sub>2</sub>               | Cl                             | <i>ortho</i> | CLBZAM11 | -47.6 | -49.7 | 133.2  | 129.6  | -47.6 | -49.7 | -46.8 | -50.4 | 2.1   | 0.8  | 2.9   | 1.9  | Flat |
| CONH <sub>2</sub>               | Cl                             | <i>meta</i>  | NABRAJ   | -27.3 | -28.4 | 150.4  | 154.0  | -27.3 | -28.4 | -29.6 | -26.0 | 1.1   | 2.3  | 1.3   | 1.6  | Flat |
| CONH <sub>2</sub>               | Cl                             | <i>para</i>  | PCBZAM10 | 29.0  | 27.8  | -150.9 | -152.7 | 29.0  | 27.8  | 29.1  | 27.4  | 1.2   | 0.1  | 1.6   | 1.0  | Flat |
| CONH <sub>2</sub>               | CN                             | <i>meta</i>  | WUKHUF   | 21.8  | 21.1  | -158.9 | -158.3 | 21.8  | 21.1  | 21.1  | 21.7  | 0.7   | 0.7  | 0.1   | 0.5  | Flat |
| CONH <sub>2</sub>               | NH <sub>2</sub>                | <i>ortho</i> | JIXCIC   | -32.1 | -32.4 | 149.9  | 145.6  | -32.1 | -32.4 | -30.1 | -34.4 | 0.4   | 2.0  | 2.3   | 1.6  | Flat |
| CONH <sub>2</sub>               | NH <sub>2</sub>                | <i>para</i>  | AMBZAM10 | -29.6 | -25.5 | 154.4  | 150.6  | -29.6 | -25.5 | -25.6 | -29.4 | 4.1   | 4.0  | 0.1   | 2.7  | Flat |
| CONH <sub>2</sub>               | OH                             | <i>ortho</i> | SALMID01 | 2.2   | 2.0   | -177.7 | -178.1 | 2.2   | 2.0   | 2.3   | 1.9   | 0.2   | 0.1  | 0.3   | 0.2  | Flat |
| CONH <sub>2</sub>               | OH                             | <i>meta</i>  | HXBZM    | 22.3  | 22.7  | -156.1 | -156.9 | 22.3  | 22.7  | 23.9  | 23.1  | 0.4   | 1.6  | 0.8   | 0.9  | Flat |
| CONH <sub>2</sub>               | OH                             | <i>para</i>  | VIDMAX   | -7.0  | -6.2  | 172.9  | 173.9  | -7.0  | -6.2  | -7.1  | -6.1  | 0.8   | 0.1  | 0.9   | 0.6  | Flat |
| CONH <sub>2</sub>               | OMe                            | <i>ortho</i> | RECQIA   | 29.9  | 34.9  | -146.5 | -148.7 | 29.9  | 34.9  | 33.5  | 31.3  | 5.0   | 3.6  | 1.4   | 3.4  | Flat |
| CONH <sub>2</sub>               | NO <sub>2</sub>                | <i>ortho</i> | ONBZAM   | 45.0  | 41.5  | -141.2 | -132.3 | 45.0  | 41.5  | 38.8  | 47.7  | 3.5   | 6.2  | 2.7   | 4.1  | Flat |
| CONH <sub>2</sub>               | NO <sub>2</sub>                | <i>meta</i>  | JACYOB   | 14.5  | 14.8  | -166.3 | -164.4 | 14.5  | 14.8  | 13.7  | 15.6  | 0.3   | 0.8  | 1.1   | 0.7  | Flat |
| CONH <sub>2</sub>               | NO <sub>2</sub>                | <i>para</i>  | NTBZAM01 | 2.0   | 3.8   | -177.8 | -176.4 | 2.0   | 3.8   | 2.2   | 3.6   | 1.7   | 0.2  | 1.5   | 1.2  | Flat |
| CONH <sub>2</sub>               | NHAc                           | <i>ortho</i> | ACBNZA   | 28.1  | 27.4  | -151.8 | -152.8 | 28.1  | 27.4  | 28.2  | 27.2  | 0.7   | 0.2  | 0.9   | 0.6  | Flat |
| NHAc                            | H                              | -            | ACANIL06 | -18.1 | -18.5 | 161.9  | 161.8  | -18.1 | -18.5 | -18.2 | -18.2 | 0.4   | 0.0  | 0.0   | 0.1  | Flat |
| NHAc                            | Me                             | <i>ortho</i> | REZRIY   | -64.4 | -65.9 | 115.5  | 114.1  | -64.4 | -65.9 | -64.5 | -65.9 | 1.5   | 0.1  | 1.4   | 1.0  | Flat |
| NHAc                            | Me                             | <i>para</i>  | ACTOLD07 | -14.0 | -18.0 | 163.9  | 164.1  | -14.0 | -18.0 | -16.1 | -15.9 | 4.0   | 2.1  | 1.9   | 2.7  | Flat |
| NHAc                            | Cl                             | <i>ortho</i> | MEJPIB01 | -42.4 | -42.7 | 138.6  | 136.4  | -42.4 | -42.7 | -41.4 | -43.7 | 0.3   | 1.0  | 1.2   | 0.8  | Flat |
| NHAc                            | Cl                             | <i>meta</i>  | GISPOO   | 21.2  | 14.5  | -163.0 | -161.3 | 21.2  | 14.5  | 17.0  | 18.7  | 6.7   | 4.2  | 2.5   | 4.4  | Flat |
| NHAc                            | Br                             | <i>ortho</i> | MAVFAR   | 42.6  | 42.6  | -138.6 | -136.3 | 42.6  | 42.6  | 41.5  | 43.8  | 0.1   | 1.2  | 1.1   | 0.8  | Flat |
| NHAc                            | Br                             | <i>meta</i>  | HOTDOK   | -19.2 | -22.2 | 160.8  | 157.8  | -19.2 | -22.2 | -19.2 | -22.2 | 3.0   | 0.0  | 3.0   | 2.0  | Flat |
| NHAc                            | Br                             | <i>para</i>  | MEWFUR   | -18.6 | -7.3  | 170.1  | 164.1  | -18.6 | -7.3  | -9.9  | -15.9 | 11.4  | 8.7  | 2.7   | 7.6  | Flat |
| NHAc                            | CF <sub>3</sub>                | <i>ortho</i> | PETLEH   | -51.6 | -51.9 | 128.1  | 128.3  | -51.6 | -51.9 | -51.9 | -51.7 | 0.3   | 0.3  | 0.1   | 0.2  | Flat |
| NHAc                            | CF <sub>3</sub>                | <i>meta</i>  | PETLAD   | -0.3  | -1.3  | 178.7  | 179.6  | -0.3  | -1.3  | -1.3  | -0.4  | 1.0   | 0.9  | 0.0   | 0.7  | Flat |
| NHAc                            | CF <sub>3</sub>                | <i>para</i>  | PETKUW   | -8.0  | -9.0  | 172.0  | 170.9  | -8.0  | -9.0  | -8.0  | -9.1  | 1.0   | 0.0  | 1.1   | 0.7  | Flat |
| NHAc                            | OH                             | <i>meta</i>  | MENSEE   | -5.9  | -6.2  | 174.1  | 173.8  | -5.9  | -6.2  | -5.9  | -6.2  | 0.3   | 0.0  | 0.3   | 0.2  | Flat |
| NHAc                            | OH                             | <i>para</i>  | HXACAN   | 17.9  | 14.8  | -163.1 | -164.2 | 17.9  | 14.8  | 16.9  | 15.8  | 3.0   | 1.0  | 2.1   | 2.0  | Flat |
| NHAc                            | OMe                            | <i>para</i>  | ACACTA   | -23.1 | -28.9 | 149.9  | 158.1  | -23.1 | -28.9 | -30.1 | -21.9 | 5.8   | 7.0  | 1.2   | 4.6  | Flat |
| NHAc                            | CN                             | <i>ortho</i> | FOMRIJ   | -37.8 | -33.3 | 146.0  | 142.9  | -37.8 | -33.3 | -34.0 | -37.1 | 4.6   | 3.8  | 0.7   | 3.0  | Flat |
| NHAc                            | NH <sub>2</sub>                | <i>para</i>  | PACTAN   | 36.3  | 36.7  | -140.0 | -147.1 | 36.3  | 36.7  | 40.0  | 32.9  | 0.4   | 3.7  | 3.3   | 2.5  | Flat |
| NHAc                            | COOH                           | <i>ortho</i> | ACANAC12 | -0.7  | -2.7  | 177.2  | 179.4  | -0.7  | -2.7  | -2.8  | -0.6  | 2.0   | 2.1  | 0.1   | 1.4  | Flat |
| NHAc                            | COOH                           | <i>meta</i>  | VIDLUQ   | -6.3  | -3.1  | 177.6  | 173.0  | -6.3  | -3.1  | -2.4  | -7.0  | 3.2   | 3.9  | 0.7   | 2.6  | Flat |
| NHAc                            | COOH                           | <i>para</i>  | DIXFAR02 | -30.4 | -30.6 | 142.9  | 147.1  | -30.4 | -30.6 | -37.1 | -32.9 | 0.3   | 6.8  | 2.5   | 3.2  | Flat |
| NHAc                            | Ac                             | <i>ortho</i> | ODATUJ   | -16.7 | -14.9 | 173.7  | 164.8  | -16.7 | -14.9 | -6.3  | -15.3 | 1.8   | 10.4 | 1.4   | 4.5  | Flat |
| NHAc                            | NO <sub>2</sub>                | <i>ortho</i> | DIXDUJ   | 25.9  | 11.3  | -169.1 | -153.8 | 25.9  | 11.3  | 10.9  | 26.2  | 14.6  | 15.0 | 0.3   | 10.0 | Flat |
| NHAc                            | NO <sub>2</sub>                | <i>meta</i>  | UGIUHEJ  | -7.6  | -7.5  | 172.3  | 172.5  | -7.6  | -7.5  | -7.7  | -7.5  | 0.2   | 0.1  | 0.1   | 0.1  | Flat |
| NHAc                            | CONH <sub>2</sub>              | <i>ortho</i> | ACBNZA   | -6.5  | -9.2  | 169.6  | 174.8  | -6.5  | -9.2  | -10.4 | -5.2  | 2.7   | 3.9  | 1.2   | 2.6  | Flat |
| NHAc                            | NHAc                           | <i>ortho</i> | WIVYIJ   | -39.6 | -50.3 | 138.1  | 132.0  | -39.6 | -50.3 | -41.9 | -48.0 | 10.6  | 2.3  | 8.3   | 7.1  | Flat |

A: 6-amino-3-methyl-1-phenyl-1*H*-pyrazolo[3,4-*b*]pyridine-5-carbonitrile, B: 2,6-bis(pyridin-2-yl)pyridine

The molecular shapes of substituents can be classified into not only flat/non-flat, but also linear (e.g. CN), spherical (e.g. halogen), and so on. Here, we defined a flat substituent as one possessing extension in two dimensions.

Among the compounds listed in Supplementary Table 1, all available single X-ray crystal structures of the compounds bearing substituent(s) containing an sp<sup>2</sup> atom (Ph, CO<sub>2</sub>H, Ac, NO<sub>2</sub>, NH<sub>2</sub>, NMe<sub>2</sub>, CONH<sub>2</sub> and NHAc) were picked up from the Cambridge Structural Database (CSD). In the case of the NMe<sub>2</sub> group, because only seven single X-ray crystal data were available, seventeen crystal data sets of compounds not listed in Supplementary Table 1 were also picked up. Next, four dihedral angles between the phenyl ring and the sp<sup>2</sup>-substituent were measured. If the absolute value of the measured dihedral angle exceeded 90 °, it was corrected by adding 180 ° with the opposite sign; we designated the resulting value as the corrected dihedral angle. The mean absolute difference values between a reference dihedral angle and the other three corrected dihedral angles was next calculated. When this mean absolute difference value is less than 10 °, the substituent is defined as flat. The angles of each substituent are shown in Supplementary Table 2. As a result, we defined Ph, CO<sub>2</sub>H, Ac, NO<sub>2</sub>, CONH<sub>2</sub> and NHAc groups as flat substituents, whereas Me, Et, *t*-Bu, F, Cl, Br, CF<sub>3</sub>, CN, NH<sub>2</sub>, OH, OMe, SO<sub>2</sub>NH<sub>2</sub> and SO<sub>2</sub>Me were defined as non-flat substituents. The NMe<sub>2</sub> group was excluded from the analyses shown in Figure 1b-c because we could not define NMe<sub>2</sub> as either flat or non-flat.



Supplementary Table 3. List of melting points and the melting point differences of the disubstituted benzenes used for statistical analysis in Fig. 1b-c.

a) Disubstituted benzenes containing flat substituent(s).

| substituent    |                   | Melting point (°C) |             |             | difference of melting point (°C) |                      |
|----------------|-------------------|--------------------|-------------|-------------|----------------------------------|----------------------|
| R <sup>1</sup> | R <sup>2</sup>    | <i>ortho</i>       | <i>meta</i> | <i>para</i> | <i>(para)-(ortho)</i>            | <i>(para)-(meta)</i> |
| Me             | CO <sub>2</sub> H | 103.4              | 109.3       | 180         | 76.6                             | 70.7                 |
| Me             | CONH <sub>2</sub> | 145                | 94.5        | 162.5       | 17.5                             | 68                   |
| Me             | NO <sub>2</sub>   | -3.6               | 15.9        | 51.7        | 55.3                             | 35.8                 |
| Me             | NHAc              | 111                | 65.9        | 151         | 40                               | 85.1                 |
| Et             | CO <sub>2</sub> H | 75.6               | 47.6        | 112         | 36.4                             | 64.4                 |
| Et             | CONH <sub>2</sub> | 133.5              | 92          | 164.7       | 31.2                             | 72.7                 |
| Et             | NO <sub>2</sub>   | -12.2              | -37.9       | -12.3       | -0.1                             | 25.6                 |
| Et             | NHAc              | 114                | 34          | 94.5        | -19.5                            | 60.5                 |
| <i>t</i> -Bu   | CO <sub>2</sub> H | 80.5               | 127.3       | 164         | 83.5                             | 36.7                 |
| <i>t</i> -Bu   | NO <sub>2</sub>   | -2.6               | 0.4         | 28.4        | 31                               | 28                   |
| <i>t</i> -Bu   | NHAc              | 165                | 102.5       | 173.3       | 8.3                              | 70.8                 |
| F              | CO <sub>2</sub> H | 124.2              | 123.6       | 183.9       | 59.7                             | 60.3                 |
| F              | CONH <sub>2</sub> | 117.5              | 128         | 154.6       | 37.1                             | 26.6                 |
| F              | NO <sub>2</sub>   | -6                 | 41          | 26.5        | 32.5                             | -14.5                |
| F              | NHAc              | 79.5               | 84.6        | 151.1       | 71.6                             | 66.5                 |
| Cl             | CO <sub>2</sub> H | 140.4              | 154.2       | 239.5       | 99.1                             | 85.3                 |
| Cl             | CONH <sub>2</sub> | 141.8              | 133.8       | 180         | 38.2                             | 46.2                 |
| Cl             | NO <sub>2</sub>   | 32.1               | 43.6        | 82.2        | 50.1                             | 38.6                 |
| Cl             | NHAc              | 86.7               | 76.6        | 178.4       | 91.7                             | 101.8                |
| Br             | CO <sub>2</sub> H | 149                | 156.7       | 254         | 105                              | 97.3                 |
| Br             | Ac                | 50.6               | 8           | 51          | 0.4                              | 43                   |
| Br             | CONH <sub>2</sub> | 161.5              | 156.5       | 192.5       | 31                               | 36                   |
| Br             | NO <sub>2</sub>   | 38.5               | 54          | 133         | 94.5                             | 79                   |

|                   |                                 |       |       |       |       |       |
|-------------------|---------------------------------|-------|-------|-------|-------|-------|
| Br                | NHAc                            | 99.2  | 87.5  | 168   | 68.8  | 80.5  |
| CF <sub>3</sub>   | CO <sub>2</sub> H               | 109   | 104   | 220   | 111   | 116   |
| CF <sub>3</sub>   | CONH <sub>2</sub>               | 163   | 121   | 187.5 | 24.5  | 66.5  |
| CF <sub>3</sub>   | NO <sub>2</sub>                 | 32.5  | -2.4  | 43    | 10.5  | 45.4  |
| CF <sub>3</sub>   | NHAc                            | 96.5  | 103.5 | 152.4 | 55.9  | 48.9  |
| CO <sub>2</sub> H | CO <sub>2</sub> H               | 207   | 348   | 440   | 233   | 92    |
| CO <sub>2</sub> H | Ac                              | 114.5 | 172   | 208   | 93.5  | 36    |
| CO <sub>2</sub> H | CN                              | 190   | 223   | 220   | 30    | -3    |
| CO <sub>2</sub> H | CONH <sub>2</sub>               | 28.5  | 81    | 80    | 51.5  | -1    |
| CO <sub>2</sub> H | NH <sub>2</sub>                 | 144.6 | 179.7 | 188.2 | 43.6  | 8.5   |
| CO <sub>2</sub> H | NO <sub>2</sub>                 | 147   | 141.3 | 241   | 94    | 99.7  |
| CO <sub>2</sub> H | NHAc                            | 187.5 | 249   | 256.5 | 69    | 7.5   |
| CO <sub>2</sub> H | OH                              | 158.6 | 201.3 | 213   | 54.4  | 11.7  |
| CO <sub>2</sub> H | OMe                             | 100.9 | 107   | 184   | 83.1  | 77    |
| CO <sub>2</sub> H | SO <sub>2</sub> NH <sub>2</sub> | 159   | 249   | 291   | 132   | 42    |
| CO <sub>2</sub> H | SO <sub>2</sub> Me              | 140   | 236.5 | 274.5 | 134.5 | 38    |
| Ac                | Ac                              | 42    | 32    | 113   | 71    | 81    |
| Ac                | CN                              | 49    | 98.5  | 59    | 10    | -39.5 |
| Ac                | CONH <sub>2</sub>               | 116.5 | 126.5 | 192   | 75.5  | 65.5  |
| Ac                | NH <sub>2</sub>                 | 20    | 98.5  | 105   | 85    | 6.5   |
| Ac                | NO <sub>2</sub>                 | 28.5  | 81    | 80    | 51.5  | -1    |
| Ac                | NHAc                            | 77    | 129   | 169   | 92    | 40    |
| Ac                | OH                              | 2.5   | 94    | 108.2 | 105.7 | 14.2  |
| Ac                | OMe                             | 34    | 60    | 39    | 5     | -21   |
| Ac                | SO <sub>2</sub> Me              | 103   | 106   | 129   | 26    | 23    |
| CN                | CONH <sub>2</sub>               | 173   | 224   | 227   | 54    | 3     |
| CN                | NO <sub>2</sub>                 | 115   | 116.6 | 147.5 | 32.5  | 30.9  |
| CN                | NHAc                            | 199.5 | 131   | 206.5 | 7     | 75.5  |
| CONH <sub>2</sub> | CONH <sub>2</sub>               | 222   | 280   | 322.3 | 100.3 | 42.3  |
| CONH <sub>2</sub> | NH <sub>2</sub>                 | 110.5 | 117.5 | 183   | 72.5  | 65.5  |

|                   |                                 |       |       |       |       |      |
|-------------------|---------------------------------|-------|-------|-------|-------|------|
| CONH <sub>2</sub> | NO <sub>2</sub>                 | 176.6 | 143.3 | 190   | 13.4  | 46.7 |
| CONH <sub>2</sub> | NHAc                            | 190   | 219.5 | 274.5 | 84.5  | 55   |
| CONH <sub>2</sub> | OH                              | 140   | 170.5 | 162   | 22    | -8.5 |
| CONH <sub>2</sub> | OMe                             | 129.5 | 134   | 166.4 | 36.9  | 32.4 |
| CONH <sub>2</sub> | SO <sub>2</sub> Me              | 155   | 177   | 226.5 | 71.5  | 49.5 |
| NH <sub>2</sub>   | NO <sub>2</sub>                 | 71    | 112   | 147.7 | 76.7  | 35.7 |
| NH <sub>2</sub>   | NHAc                            | 133.5 | 88    | 166.5 | 33    | 78.5 |
| NO <sub>2</sub>   | NO <sub>2</sub>                 | 115.8 | 90.8  | 171.1 | 55.3  | 80.3 |
| NO <sub>2</sub>   | NHAc                            | 93    | 154.5 | 216   | 123   | 61.5 |
| NO <sub>2</sub>   | OH                              | 44.9  | 95    | 113.8 | 68.9  | 18.8 |
| NO <sub>2</sub>   | OMe                             | 9.4   | 38    | 54    | 44.6  | 16   |
| NO <sub>2</sub>   | SO <sub>2</sub> NH <sub>2</sub> | 193.7 | 168   | 181   | -12.7 | 13   |
| NO <sub>2</sub>   | SO <sub>2</sub> Me              | 136   | 148   | 142.5 | 6.5   | -5.5 |
| NHAc              | NHAc                            | 188.7 | 188   | 310   | 121.3 | 122  |
| NHAc              | OH                              | 209   | 148.5 | 168   | -41   | 19.5 |
| NHAc              | OMe                             | 87.5  | 81    | 127.2 | 39.7  | 46.2 |
| NHAc              | SO <sub>2</sub> NH <sub>2</sub> | 163   | 217   | 219   | 56    | 2    |
| NHAc              | SO <sub>2</sub> Me              | 147   | 142.5 | 188   | 41    | 45.5 |
| Ph                | Me                              | -0.2  | 4.5   | 48.1  | 48.3  | 43.6 |
| Ph                | Et                              | -6.1  | -27.6 | 34.5  | 40.6  | 62.1 |
| Ph                | F                               | 73.5  | 27    | 74.2  | 0.7   | 47.2 |
| Ph                | Cl                              | 31.8  | 16    | 75.4  | 43.6  | 59.4 |
| Ph                | CO <sub>2</sub> H               | 112   | 162.5 | 228.8 | 116.8 | 66.3 |
| Ph                | Ac                              | 56    | 36    | 121   | 65    | 85   |
| Ph                | CONH <sub>2</sub>               | 175   | 173   | 223   | 48    | 50   |
| Ph                | NO <sub>2</sub>                 | 37    | 61    | 112.9 | 75.9  | 51.9 |
| Ph                | NHAc                            | 121.5 | 149   | 171.2 | 49.7  | 22.2 |
| Ph                | Br                              | 0.8   | 9     | 87    | 86.2  | 78   |
| Ph                | CF <sub>3</sub>                 | 15    | 26.5  | 71.5  | 56.5  | 45   |
| Ph                | CN                              | 39    | 49    | 88    | 49    | 39   |

|    |                                 |       |      |       |       |       |
|----|---------------------------------|-------|------|-------|-------|-------|
| Ph | NH <sub>2</sub>                 | 49.1  | 31.5 | 51    | 1.9   | 19.5  |
| Ph | OH                              | 57.5  | 75.3 | 168   | 110.5 | 92.7  |
| Ph | OMe                             | 29    | 88   | 90    | 61    | 2     |
| Ph | SO <sub>2</sub> NH <sub>2</sub> | 120.5 | 131  | 228   | 107.5 | 97    |
| Ph | SO <sub>2</sub> Me              | 101   | 85   | 145   | 44    | 60    |
| Ph | Ph                              | 56.2  | 86.9 | 213.8 | 157.6 | 126.9 |

---

b) Disubstituted benzenes with solely non-flat substituents

| Substituent    |                                 | Melting point (°C) |             |             | Difference of melting point (°C) |                                 |
|----------------|---------------------------------|--------------------|-------------|-------------|----------------------------------|---------------------------------|
| R <sup>1</sup> | R <sup>2</sup>                  | <i>ortho</i>       | <i>meta</i> | <i>para</i> | ( <i>para</i> )-( <i>ortho</i> ) | ( <i>para</i> )-( <i>meta</i> ) |
| Me             | Me                              | -25.2              | -47.9       | 13.3        | 38.5                             | 61.2                            |
| Me             | Et                              | -80.7              | -95.7       | -62.7       | 18                               | 33                              |
| Me             | <i>t</i> -Bu                    | -50.3              | -41.4       | -52.5       | -2.2                             | -11.1                           |
| Me             | F                               | -62.5              | -89.2       | -56.6       | 5.9                              | 32.6                            |
| Me             | Cl                              | -35.9              | -47.8       | 7.4         | 43.3                             | 55.2                            |
| Me             | Br                              | -27.5              | -38.1       | 26.2        | 53.7                             | 64.3                            |
| Me             | CN                              | -10.5              | -23         | 28          | 38.5                             | 51                              |
| Me             | NH <sub>2</sub>                 | -14.4              | -30.8       | 43.3        | 57.7                             | 74.1                            |
| Me             | OH                              | 31                 | 12.2        | 34.8        | 3.8                              | 22.6                            |
| Me             | OMe                             | -34.1              | -55.5       | -31.6       | 2.5                              | 23.9                            |
| Me             | SO <sub>2</sub> NH <sub>2</sub> | 156.3              | 108         | 138         | -18.3                            | 30                              |
| Me             | SO <sub>2</sub> Me              | 57.4               | 35          | 88          | 30.6                             | 53                              |
| Et             | Et                              | -31.4              | -83.9       | -43.3       | -11.9                            | 40.6                            |
| Et             | Cl                              | -83.3              | -55         | -62.5       | 20.8                             | -7.5                            |
| Et             | NH <sub>2</sub>                 | -47                | -64         | -5.1        | 41.9                             | 58.9                            |
| Et             | OH                              | 18                 | 0           | 45          | 27                               | 45                              |
| Et             | SO <sub>2</sub> NH <sub>2</sub> | 127                | 89          | 109         | -18                              | 20                              |
| <i>t</i> -Bu   | <i>t</i> -Bu                    | 27.5               | 10.6        | 77.6        | 50.1                             | 67                              |
| <i>t</i> -Bu   | OH                              | -5.6               | 47          | 100         | 105.6                            | 53                              |
| F              | F                               | -47.1              | -69.1       | -23.5       | 23.6                             | 45.6                            |
| F              | CF <sub>3</sub>                 | -51.2              | -81.5       | -41.7       | 9.5                              | 39.8                            |
| F              | OH                              | 16.1               | 14          | 48          | 31.9                             | 34                              |
| F              | OMe                             | -39                | -35         | -45         | -6                               | -10                             |
| F              | SO <sub>2</sub> NH <sub>2</sub> | 158.5              | 129.5       | 126         | -32.5                            | -3.5                            |
| F              | SO <sub>2</sub> Me              | 50                 | 42          | 80          | 30                               | 38                              |

|                 |                                 |       |       |       |       |      |
|-----------------|---------------------------------|-------|-------|-------|-------|------|
| Cl              | Cl                              | -17   | -24.8 | 53.1  | 70.1  | 77.9 |
| Cl              | Br                              | -12.6 | -21.4 | 64.8  | 77.4  | 86.2 |
| Cl              | CF <sub>3</sub>                 | -6    | -56   | -33   | -27   | 23   |
| Cl              | CN                              | 43.5  | 41    | 91.6  | 48.1  | 50.6 |
| Cl              | NH <sub>2</sub>                 | -2.3  | -10.3 | 70.4  | 72.7  | 80.7 |
| Cl              | OH                              | 8     | 32.5  | 43.1  | 35.1  | 10.6 |
| Cl              | SO <sub>2</sub> NH <sub>2</sub> | 188.3 | 148   | 146   | -42.3 | -2   |
| Cl              | SO <sub>2</sub> Me              | 94.2  | 108   | 98    | 3.8   | -10  |
| Br              | Br                              | 6     | -6.9  | 87.3  | 81.3  | 94.2 |
| Br              | CN                              | 55.5  | 39.5  | 114   | 58.5  | 74.5 |
| Br              | NH <sub>2</sub>                 | 30.9  | 18.5  | 78.2  | 47.3  | 59.7 |
| Br              | OH                              | 5.6   | 33    | 63    | 57.4  | 30   |
| Br              | SO <sub>2</sub> NH <sub>2</sub> | 186   | 154   | 166.5 | -19.5 | 12.5 |
| Br              | SO <sub>2</sub> Me              | 108.5 | 103   | 105   | -3.5  | 2    |
| CF <sub>3</sub> | CN                              | 18    | 14.5  | 37.5  | 19.5  | 23   |
| CF <sub>3</sub> | NH <sub>2</sub>                 | 35.5  | 5.5   | 38    | 2.5   | 32.5 |
| CF <sub>3</sub> | OH                              | 45.5  | -0.9  | 47    | 1.5   | 47.9 |
| CF <sub>3</sub> | OMe                             | -14.1 | -65   | -9.1  | 5     | 55.9 |
| CF <sub>3</sub> | SO <sub>2</sub> NH <sub>2</sub> | 185   | 122   | 184   | -1    | 62   |
| CF <sub>3</sub> | SO <sub>2</sub> Me              | 75    | 60    | 101   | 26    | 41   |
| CN              | CN                              | 140.9 | 162   | 224   | 83.1  | 62   |
| CN              | NH <sub>2</sub>                 | 51    | 53    | 86.2  | 35.2  | 33.2 |
| CN              | OH                              | 98    | 82.8  | 113   | 15    | 30.2 |
| CN              | OMe                             | 59    | 23    | 62    | 3     | 39   |
| CN              | SO <sub>2</sub> NH <sub>2</sub> | 160   | 153   | 173.2 | 13.2  | 20.2 |
| CN              | SO <sub>2</sub> Me              | 104   | 105   | 142.8 | 38.8  | 37.8 |
| NH <sub>2</sub> | NH <sub>2</sub>                 | 103   | 65.5  | 140.3 | 37.3  | 74.8 |
| NH <sub>2</sub> | OH                              | 173.5 | 122.5 | 186   | 12.5  | 63.5 |
| NH <sub>2</sub> | OMe                             | 6.2   | -1    | 57.8  | 51.6  | 58.8 |
| NH <sub>2</sub> | SO <sub>2</sub> NH <sub>2</sub> | 157   | 140.2 | 166.1 | 9.1   | 25.9 |

|                                 |                                 |       |       |      |      |      |
|---------------------------------|---------------------------------|-------|-------|------|------|------|
| NH <sub>2</sub>                 | SO <sub>2</sub> Me              | 87    | 73    | 138  | 51   | 65   |
| OH                              | OH                              | 104.6 | 109.8 | 173  | 68.4 | 63.2 |
| OH                              | SO <sub>2</sub> NH <sub>2</sub> | 141   | 166   | 178  | 37   | 12   |
| OH                              | SO <sub>2</sub> Me              | 87.5  | 84    | 96.5 | 9    | 12.5 |
| OMe                             | OMe                             | 22.5  | -35.3 | 56.2 | 33.7 | 91.5 |
| OMe                             | SO <sub>2</sub> NH <sub>2</sub> | 171   | 130   | 116  | -55  | -14  |
| OMe                             | SO <sub>2</sub> Me              | 93.5  | 47    | 122  | 28.5 | 75   |
| SO <sub>2</sub> NH <sub>2</sub> | SO <sub>2</sub> NH <sub>2</sub> | 254   | 229   | 289  | 35   | 60   |
| SO <sub>2</sub> Me              | SO <sub>2</sub> Me              | 228   | 200   | 261  | 33   | 61   |

---





Supplementary Table 5. List of Log*P* of disubstituted benzenes with medicinal chemistry-friendly substituents.

a) The order of Log*P* among the regioisomers.

|                                 |                 | Substituent 1 |      |      |   |      |      |                 |      |                 |       |       |                                 |                    |      |                   |      |                 |                   |      |                  |      |
|---------------------------------|-----------------|---------------|------|------|---|------|------|-----------------|------|-----------------|-------|-------|---------------------------------|--------------------|------|-------------------|------|-----------------|-------------------|------|------------------|------|
|                                 |                 | Me            | Et   | t-Bu | F | Cl   | Br   | CF <sub>3</sub> | CN   | NH <sub>2</sub> | OH    | OMe   | SO <sub>2</sub> NH <sub>2</sub> | SO <sub>2</sub> Me | Ph   | CO <sub>2</sub> H | Ac   | NO <sub>2</sub> | CONH <sub>2</sub> | NHAc | NMe <sub>2</sub> |      |
| Substituent 2                   | H               | <i>mono</i>   | 2.73 |      |   |      |      |                 |      |                 |       |       |                                 |                    |      |                   |      |                 |                   |      |                  |      |
|                                 |                 | <i>ortho</i>  | 3.12 | 3.53 |   |      |      |                 |      |                 |       |       |                                 |                    |      |                   |      |                 |                   |      |                  | 2.85 |
|                                 | Me              | <i>meta</i>   | 3.20 |      |   |      | 3.28 |                 |      |                 |       |       |                                 |                    |      |                   |      |                 |                   | 2.45 | 1.18             | 1.52 |
|                                 |                 | <i>para</i>   | 3.15 | 3.65 |   |      | 3.33 |                 |      | 1.39            | 1.94  | 2.66  | 0.82                            |                    | 4.63 | 2.34              | 2.10 | 2.42            | 1.18              |      |                  |      |
|                                 | Et              | <i>ortho</i>  |      |      |   |      |      |                 |      |                 | 2.47  |       |                                 |                    |      |                   |      |                 |                   |      |                  |      |
|                                 |                 | <i>meta</i>   |      |      |   |      |      |                 |      |                 | 2.40  |       |                                 |                    |      |                   |      |                 |                   |      |                  |      |
|                                 |                 | <i>para</i>   |      |      |   |      |      |                 |      | 1.96            | 2.42  |       |                                 |                    |      |                   |      |                 |                   |      |                  |      |
|                                 | t-Bu            | <i>ortho</i>  |      |      |   |      |      |                 |      |                 |       |       |                                 |                    |      |                   |      |                 |                   |      |                  |      |
|                                 |                 | <i>meta</i>   |      |      |   |      |      |                 |      |                 |       |       |                                 |                    |      |                   |      |                 |                   |      |                  |      |
|                                 |                 | <i>para</i>   |      |      |   |      |      |                 |      |                 |       |       |                                 |                    |      |                   |      |                 |                   |      |                  |      |
|                                 | F               | <i>ortho</i>  |      |      |   | 3.38 |      |                 |      | 1.26            | 1.68  |       |                                 |                    |      |                   | 1.77 |                 |                   | 0.64 |                  |      |
|                                 |                 | <i>meta</i>   |      |      |   | 3.48 |      |                 |      | 1.30            | 1.93  |       |                                 |                    |      |                   | 2.15 |                 |                   |      |                  |      |
|                                 |                 | <i>para</i>   |      |      |   | 3.38 |      |                 |      | 1.15            | 1.79  | 1.72  |                                 |                    |      |                   | 2.08 |                 |                   |      |                  | 1.47 |
|                                 | Cl              | <i>ortho</i>  |      |      |   |      |      |                 |      | 1.90            | 2.19  |       | 0.74                            |                    | 4.59 | 1.98              | 2.09 | 2.24            |                   |      | 1.28             |      |
|                                 |                 | <i>meta</i>   |      |      |   |      |      |                 |      | 1.88            | 2.48  |       | 1.29                            |                    | 4.71 | 2.68              | 2.51 | 2.46            |                   |      |                  |      |
|                                 |                 | <i>para</i>   |      |      |   |      |      |                 |      | 1.83            | 2.40  |       | 0.84                            |                    | 4.61 | 2.65              | 2.39 | 2.39            |                   |      |                  | 2.05 |
|                                 | Br              | <i>ortho</i>  |      |      |   |      |      |                 |      | 2.19            | 2.35  |       |                                 |                    |      | 2.20              |      |                 |                   | 0.73 |                  |      |
|                                 |                 | <i>meta</i>   |      |      |   |      |      |                 |      | 2.10            | 2.63  |       |                                 |                    |      | 2.87              |      |                 |                   |      |                  |      |
|                                 |                 | <i>para</i>   |      |      |   |      |      |                 |      | 2.05            | 2.65  | 2.43  | 1.36                            |                    |      | 2.86              |      |                 |                   |      |                  | 2.29 |
|                                 | CF <sub>3</sub> | <i>ortho</i>  |      |      |   |      |      |                 |      |                 | 2.80  |       |                                 |                    |      |                   |      | 2.64            |                   |      |                  |      |
| <i>meta</i>                     |                 |               |      |      |   |      |      |                 | 2.39 | 2.95            |       |       |                                 |                    | 2.95 | 2.63              | 2.62 |                 |                   | 2.20 |                  |      |
| <i>para</i>                     |                 |               |      |      |   |      |      |                 | 1.95 |                 |       |       |                                 |                    |      |                   |      |                 | 1.71              |      |                  |      |
| CN                              | <i>ortho</i>    |               |      |      |   |      |      |                 |      | 1.60            |       |       |                                 |                    |      |                   |      |                 |                   |      |                  |      |
|                                 | <i>meta</i>     |               |      |      |   |      |      |                 | 1.07 | 1.70            |       |       |                                 |                    | 1.48 | 1.16              | 1.17 |                 | 0.52              |      |                  |      |
|                                 | <i>para</i>     |               |      |      |   |      |      |                 | 1.60 |                 |       | 0.23  |                                 |                    | 1.56 | 1.22              | 1.19 |                 | 0.48              |      |                  |      |
| NH <sub>2</sub>                 | <i>ortho</i>    |               |      |      |   |      |      |                 | 0.15 | 0.62            | 0.95  |       |                                 |                    |      | 1.62              | 1.83 | 0.35            |                   |      |                  |      |
|                                 | <i>meta</i>     |               |      |      |   |      |      |                 | 0.17 | 0.93            |       |       |                                 |                    |      |                   | 1.37 |                 |                   |      |                  |      |
|                                 | <i>para</i>     |               |      |      |   |      |      |                 | 0.04 | 0.95            | -0.60 | -0.12 |                                 |                    |      |                   | 1.39 |                 | -0.20             |      |                  |      |
| OH                              | <i>ortho</i>    |               |      |      |   |      |      |                 |      | 1.32            |       |       |                                 |                    | 2.24 | 1.90              | 1.79 | 1.28            |                   |      |                  |      |
|                                 | <i>meta</i>     |               |      |      |   |      |      |                 |      | 1.58            |       |       |                                 |                    | 1.50 | 1.39              | 2.00 | 0.39            |                   |      |                  |      |
|                                 | <i>para</i>     |               |      |      |   |      |      |                 |      | 1.39            | 0.06  |       |                                 |                    | 1.58 | 1.30              | 1.91 | 0.33            |                   |      |                  |      |
| OMe                             | <i>ortho</i>    |               |      |      |   |      |      |                 |      |                 |       |       |                                 |                    | 1.59 |                   | 1.73 | 0.84            | 0.98              |      |                  |      |
|                                 | <i>meta</i>     |               |      |      |   |      |      |                 |      |                 |       | 0.86  |                                 |                    | 2.02 | 1.84              | 2.16 | 0.85            |                   |      |                  |      |
|                                 | <i>para</i>     |               |      |      |   |      |      |                 |      |                 |       | 0.47  |                                 |                    | 1.96 | 1.74              | 2.03 | 0.86            |                   | 1.14 |                  |      |
| SO <sub>2</sub> NH <sub>2</sub> | <i>ortho</i>    |               |      |      |   |      |      |                 |      |                 |       |       |                                 |                    |      |                   | 0.34 |                 |                   |      |                  |      |
|                                 | <i>meta</i>     |               |      |      |   |      |      |                 |      |                 |       | -0.55 |                                 |                    |      |                   | 0.55 |                 |                   |      |                  |      |
|                                 | <i>para</i>     |               |      |      |   |      |      |                 |      |                 |       |       |                                 |                    |      |                   | 0.20 | 0.64            |                   |      | 0.76             |      |
| SO <sub>2</sub> Me              | <i>ortho</i>    |               |      |      |   |      |      |                 |      |                 |       |       |                                 |                    |      |                   |      |                 |                   |      |                  |      |
|                                 | <i>meta</i>     |               |      |      |   |      |      |                 |      |                 |       |       |                                 |                    |      |                   |      |                 |                   |      |                  |      |
|                                 | <i>para</i>     |               |      |      |   |      |      |                 |      |                 |       |       |                                 |                    |      | 0.67              |      |                 |                   |      |                  |      |
| Ph                              | <i>ortho</i>    |               |      |      |   |      |      |                 |      |                 |       |       |                                 |                    |      |                   |      |                 |                   |      |                  |      |
|                                 | <i>meta</i>     |               |      |      |   |      |      |                 |      |                 |       |       |                                 |                    |      |                   |      |                 |                   |      |                  |      |
|                                 | <i>para</i>     |               |      |      |   |      |      |                 |      |                 |       |       |                                 |                    |      |                   |      |                 |                   |      |                  |      |
| CO <sub>2</sub> H               | <i>ortho</i>    |               |      |      |   |      |      |                 |      |                 |       |       |                                 |                    | 0.79 | 0.81              | 1.46 |                 | 1.88              |      |                  |      |
|                                 | <i>meta</i>     |               |      |      |   |      |      |                 |      |                 |       |       |                                 |                    | 1.66 |                   | 1.83 |                 |                   |      |                  |      |
|                                 | <i>para</i>     |               |      |      |   |      |      |                 |      |                 |       |       |                                 |                    | 2.00 |                   | 1.89 |                 | 1.31              |      |                  |      |
| Ac                              | <i>ortho</i>    |               |      |      |   |      |      |                 |      |                 |       |       |                                 |                    |      |                   | 1.28 |                 |                   |      |                  |      |
|                                 | <i>meta</i>     |               |      |      |   |      |      |                 |      |                 |       |       |                                 |                    |      |                   | 1.42 |                 |                   |      |                  |      |
|                                 | <i>para</i>     |               |      |      |   |      |      |                 |      |                 |       |       |                                 |                    |      |                   | 1.48 |                 |                   |      | 2.10             |      |
| NO <sub>2</sub>                 | <i>ortho</i>    |               |      |      |   |      |      |                 |      |                 |       |       |                                 |                    |      |                   | 1.58 |                 | 1.00              |      |                  |      |
|                                 | <i>meta</i>     |               |      |      |   |      |      |                 |      |                 |       |       |                                 |                    |      |                   | 1.49 | 0.77            | 1.47              |      |                  |      |
|                                 | <i>para</i>     |               |      |      |   |      |      |                 |      |                 |       |       |                                 |                    |      |                   | 1.49 | 0.82            | 1.66              | 2.27 |                  |      |
| CONH <sub>2</sub>               | <i>ortho</i>    |               |      |      |   |      |      |                 |      |                 |       |       |                                 |                    |      |                   |      |                 | -1.73             |      |                  |      |
|                                 | <i>meta</i>     |               |      |      |   |      |      |                 |      |                 |       |       |                                 |                    |      |                   |      |                 | -0.21             |      | 0.95             |      |
|                                 | <i>para</i>     |               |      |      |   |      |      |                 |      |                 |       |       |                                 |                    |      |                   |      |                 | 0.01              | 1.14 |                  |      |
| NHAc                            | <i>ortho</i>    |               |      |      |   |      |      |                 |      |                 |       |       |                                 |                    |      |                   |      |                 |                   |      |                  |      |
|                                 | <i>meta</i>     |               |      |      |   |      |      |                 |      |                 |       |       |                                 |                    |      |                   |      |                 |                   |      |                  |      |
|                                 | <i>para</i>     |               |      |      |   |      |      |                 |      |                 |       |       |                                 |                    |      |                   |      |                 |                   |      |                  |      |
| NMe <sub>2</sub>                | <i>ortho</i>    |               |      |      |   |      |      |                 |      |                 |       |       |                                 |                    |      |                   |      |                 |                   |      |                  |      |
|                                 | <i>meta</i>     |               |      |      |   |      |      |                 |      |                 |       |       |                                 |                    |      |                   |      |                 |                   |      |                  |      |
|                                 | <i>para</i>     |               |      |      |   |      |      |                 |      |                 |       |       |                                 |                    |      |                   |      |                 |                   |      |                  |      |

Red and blue highlights indicate cases where the Log*P* value difference exceeds 0.3 among other regioisomers.



Supplementary Table 6. List of melting points of tetrasubstituted and hexasubstituted benzenes with simple substituents.

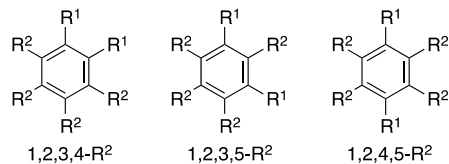

|                   |                                 | Substituent 1 |         |         |         |         |         |         |         |         |         |         |         |     |
|-------------------|---------------------------------|---------------|---------|---------|---------|---------|---------|---------|---------|---------|---------|---------|---------|-----|
|                   |                                 | H             |         |         | Me      |         |         | Cl      |         |         | Br      |         |         |     |
|                   |                                 | ortho         | meta    | para    | ortho   | meta    | para    | ortho   | meta    | para    | ortho   | meta    | para    |     |
| Substituent 2     | position of R <sup>1</sup>      |               |         |         |         |         |         |         |         |         |         |         |         |     |
|                   | symmetry No.                    | 2             | 2       | 4       | 2       | 2       | 4       | 2       | 2       | 4       | 2       | 2       | 4       |     |
|                   | position of R <sup>2</sup>      | 1,2,3,4       | 1,2,3,5 | 1,2,4,5 | 1,2,3,4 | 1,2,3,5 | 1,2,4,5 | 1,2,3,4 | 1,2,3,5 | 1,2,4,5 | 1,2,3,4 | 1,2,3,5 | 1,2,4,5 |     |
|                   | Non Flat                        | Me            | -6.3    | -23.7   | 79.3    | 168.0   | 168.0   | 168.0   | 228     | 220     | 223     | 261     | 252     | 253 |
|                   | Et                              | 11.6          | -21.0   | 13.0    | 45      | 36      | 102     | -       | 45      | 72      | 64.5    | 78.2    | 115.5   |     |
|                   | t-Bu                            | -             | -       | 156.0   | -       | -       | -       | -       | -       | -       | -       | -       | -       |     |
|                   | F                               | -42.2         | -48.0   | 3.9     | -       | -       | 61      | 87      | 54      | 76.5    | 125     | 87      | -       |     |
|                   | Cl                              | 46.9          | 54.0    | 139.7   | 195     | 190     | 191     | 228.4   | 228.4   | 228.4   | 285     | 282     | 283     |     |
|                   | Br                              | 62.0          | 98.5    | 180.0   | 208     | 198.5   | 202     | 251     | -       | 248     | 325.7   | 325.7   | 325.7   |     |
|                   | CF <sub>3</sub>                 | 21.0          | 50.0    | 74.0    | -       | -       | -       | -       | -       | -       | -       | -       | -       |     |
|                   | CN                              | -             | 155.0   | 272.0   | 229.2   | 180     | 209     | 257     | 252     | 307.8   | 324     | -       | -       |     |
|                   | NH <sub>2</sub>                 | -             | -       | 281.0   | 144     | -       | 150     | 235     | 220.5   | 225     | -       | 213     | 255     |     |
|                   | OH                              | 161.0         | 170.0   | 233.0   | 111     | 162.5   | 233     | 193     | 142     | 236     | 193     | 167     | 250     |     |
|                   | OMe                             | 89.5          | 46.0    | 103.0   | 21      | -       | 115     | 90      | 102     | 165     | 127.5   | 118     | 231     |     |
|                   | SO <sub>2</sub> NH <sub>2</sub> | -             | -       | -       | -       | -       | -       | -       | -       | -       | -       | -       | -       |     |
|                   | SO <sub>2</sub> Me              | -             | -       | -       | -       | -       | -       | -       | -       | -       | -       | -       | -       |     |
|                   | Flat                            | Ph            | 191.4   | 224.0   | 267.5   | -       | -       | -       | -       | -       | -       | -       | -       |     |
|                   | CO <sub>2</sub> H               | 241.0         | 247.0   | 283.0   | 249     | 270     | -       | 255.3   | 290     | 335     | 280     | 292     | 300     |     |
|                   | Ac                              | -             | -       | -       | -       | -       | -       | -       | -       | -       | -       | -       | -       |     |
|                   | NO <sub>2</sub>                 | 121.0         | 127.0   | 191.0   | 178.4   | 183.5   | 207.5   | 151     | 165     | 234     | 223     | 242     | 320     |     |
| CONH <sub>2</sub> | -                               | -             | 300.0   | -       | -       | -       | -       | -       | -       | -       | -       | 342     |         |     |
| NHAc              | -                               | 245.0         | 267.5   | -       | -       | -       | -       | -       | -       | -       | -       | -       |         |     |
| NMe <sub>2</sub>  | -                               | -             | 95.0    | -       | -       | -       | -       | -       | -       | -       | -       | -       |         |     |

Red and blue figures indicate the lowest and the highest melting point among the three regioisomers, respectively. For definitions of “flat” and “non-flat” substituents, see Supplementary Table 2. Melting points of tetrasubstituted and hexasubstituted benzenes were taken from reaxys, <https://www.reaxys.com>, Elsevier.

Supplementary Table 7. Comparison of melting points between 1,4-disubstituted benzenes and 1,3,5-trisubstituted benzenes

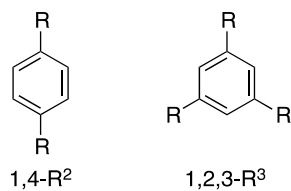

|          | position of R                   | 1,4          | 1,3,5        |
|----------|---------------------------------|--------------|--------------|
|          | symmetry No.                    | 4            | 6            |
| Non Flat | Me                              | 13.3         | <b>-45.9</b> |
|          | Et                              | -43.3        | <b>-66.5</b> |
|          | t-Bu                            | 77.6         | <b>75.0</b>  |
|          | F                               | <b>-23.5</b> | -5.5         |
|          | Cl                              | <b>53.1</b>  | 62.9         |
|          | Br                              | <b>87.3</b>  | 122.1        |
|          | CF <sub>3</sub>                 | <b>2.8</b>   | 9.0          |
|          | CN                              | <b>224.0</b> | 258.0        |
|          | NH <sub>2</sub>                 | 140.3        | <b>112.0</b> |
|          | OH                              | <b>173.0</b> | 218.3        |
|          | OMe                             | 56.2         | <b>56.0</b>  |
|          | SO <sub>2</sub> NH <sub>2</sub> | <b>289.0</b> | 347.0        |
|          | SO <sub>2</sub> Me              | <b>261.0</b> | 353.0        |
| Flat     | Ph                              | 213.8        | <b>175.0</b> |
|          | CO <sub>2</sub> H               | 440.0        | <b>380.0</b> |
|          | Ac                              | <b>113.0</b> | 168.0        |
|          | NO <sub>2</sub>                 | 171.1        | <b>122.9</b> |
|          | CONH <sub>2</sub>               | 322.3        | -            |
|          | NHAc                            | 310.0        | <b>242.0</b> |
|          | NMe <sub>2</sub>                | 51.0         | <b>44.0</b>  |

Red figures indicate the lower melting point. For definitions of “flat” and “non-flat” substituents, see Supplementary Table 2. Melting points of trisubstituted benzenes were taken from reaxys, <https://www.reaxys.com>, Elsevier.

Supplementary Table 8. List of melting points of pharmaceutical compounds bearing disubstituted benzene with non-flat groups used for matched molecular pair analysis

| entry | year | vol | page  | R <sup>1</sup>                                    | R <sup>2</sup>    | compound No |          |          | melting point |          |          |
|-------|------|-----|-------|---------------------------------------------------|-------------------|-------------|----------|----------|---------------|----------|----------|
|       |      |     |       |                                                   |                   | <i>o</i>    | <i>m</i> | <i>p</i> | <i>o</i>      | <i>m</i> | <i>p</i> |
| 1     | 2017 | 60  | 9575  | CH <sub>2</sub> Ar                                | F                 | 17          | 16       | 15       | 155           | 138      | 126      |
| 2     |      |     |       | CH <sub>2</sub> Ar                                | Cl                | 20          | 19       | 18       | 144           | 137      | 153      |
| 3     |      |     |       | CH <sub>2</sub> Ar                                | Me                | 28          | 27       | 26       | 144           | 127      | 145      |
| 4     |      |     |       | CH <sub>2</sub> Ar                                | CF <sub>3</sub>   | 34          | 33       | 32       | 154           | 136      | 142      |
| 5     |      |     |       | CH <sub>2</sub> Ar                                | Br                | 23          | 22       | 21       | 128           | 146      | 157      |
| 6     |      |     |       | CH <sub>2</sub> Ar                                | MeO               | 31          | 30       | 29       | 104           | 106      | 153      |
| 7     |      |     |       | CH <sub>2</sub> Ar                                | CN                | 37          | 36       | 35       | 127           | 131      | 118      |
| 8     | 2017 | 60  | 8441  | (CH <sub>2</sub> ) <sub>3</sub> NHCOAr            | HO                | 4b          | 4a       | 4c       | 222           | 245      | 222      |
| 9     | 2017 | 60  | 6942  | CH <sub>2</sub> CONHR                             | Cl                | 5a          | 5b       | 5c       | 210           | 183      | 223      |
| 10    |      |     |       | CH <sub>2</sub> CONHR                             | MeO               | 5d          | 5e       | 5f       | 211           | 139      | 144      |
| 11    |      |     |       | CH <sub>2</sub> Ar                                | Cl                | 28e         | 28f      | 24c      | 178           | 25       | 200      |
| 12    |      |     |       | CH <sub>2</sub> NHCOAr                            | MeO               | 115c        | 115b     | 115a     | 140           | 130      | 204      |
| 13    | 2017 | 60  | 4963  | OSO <sub>2</sub> Ar                               | Me                | 6           | 12       | 22       | 158           | 125      | 157      |
| 14    |      |     |       | OSO <sub>2</sub> Ar                               | MeO               | 8           | 13       | 23       | 136           | 113      | 185      |
| 15    |      |     |       | OSO <sub>2</sub> Ar                               | MeO               | 26          | 27       | 35       | 134           | 97       | 140      |
| 16    |      |     |       | OSO <sub>2</sub> Ar                               | MeO               | 38          | 43       | 51       | 138           | 66       | 107      |
| 17    |      |     |       | OSO <sub>2</sub> Ar                               | Me                | 36          | 42       | 50       | 141           | 78       | 88       |
| 18    |      |     |       | OSO <sub>2</sub> Ar                               | MeO               | 55          | 56       | 68       | 115           | 57       | 68       |
| 19    | 2017 | 60  | 4424  | CH <sub>2</sub> Het                               | F                 | 25h         | 25g      | 25f      | 177           | 158      | 262      |
| 20    |      |     |       | CH <sub>2</sub> Het                               | Br                | 25k         | 25j      | 25i      | 167           | 182      | 194      |
| 21    |      |     |       | CH <sub>2</sub> Het                               | Cl                | 25n         | 25m      | 25l      | 168           | 164      | 184      |
| 22    |      |     |       | CH <sub>2</sub> Het                               | CN                | 25t         | 25s      | 25r      | 125           | 185      | 180      |
| 23    | 2016 | 59  | 10564 | CH <sub>2</sub> NHAr                              | MeO               | 13          | 14       | 12       | 256           | 201      | 192      |
| 24    | 2016 | 59  | 7991  | CH <sub>2</sub> Het                               | CN                | 18          | 21       | 17       | 87            | 200      | 100      |
| 25    | 2016 | 59  | 7223  | CH <sub>2</sub> Ar                                | MeO               | 15e         | 15d      | 15c      | 134           | 154      | 116      |
| 26    | 2016 | 59  | 867   | CH <sub>2</sub> Ar                                | Me                | 50          | 51       | 52       | 99            | 87       | 102      |
| 27    |      |     |       | CH <sub>2</sub> Ar                                | MeO               | 53          | 54       | 55       | 121           | 64       | 112      |
| 28    |      |     |       | CH <sub>2</sub> Ar                                | F                 | 56          | 57       | 58       | 100           | 110      | 123      |
| 29    | 2015 | 58  | 7341  | CbCONHAr                                          | Br                | 1e          | 1f       | 1g       | 182           | 171      | 165      |
| 30    |      |     |       | CbCONHAr                                          | Cl                | 1b          | 1c       | 1d       | 181           | 189      | 167      |
| 31    | 2015 | 58  | 4610  | CH <sub>2</sub> Ar                                | MeO               | 10c         | 10e      | 10h      | 156           | 179      | 156      |
| 32    |      |     |       | CH <sub>2</sub> Ar                                | MeO               | 11c         | 11e      | 11h      | 175           | 181      | 152      |
| 33    | 2014 | 57  | 10314 | CH <sub>2</sub> Het                               | Br                | 8           | 9        | 10       | 189           | 174      | 181      |
| 34    | 2014 | 57  | 6030  | OCH <sub>2</sub> Ar                               | MeO               | 6           | 5        | 4        | 110.8         | 78.7     | 130.2    |
| 35    |      |     |       | OCH <sub>2</sub> Ar                               | HO                | 9           | 8        | 7        | 63.4          | 110.6    | 153.7    |
| 36    |      |     |       | OCH <sub>2</sub> Ar                               | NH <sub>2</sub>   | 18          | 17       | 16       | 100.1         | 154.8    | 140      |
| 37    | 2014 | 57  | 4239  | CH <sub>2</sub> Ar                                | MeO               | 40d         | 40e      | 40f      | 161.3         | 139.3    | 143.6    |
| 38    | 2014 | 57  | 1473  | SO <sub>2</sub> CH=CHAr                           | MeO               | 12a         | 11a      | 10a      | 119           | 75       | 95       |
| 39    |      |     |       | SO <sub>2</sub> CH=CHAr                           | MeO               | 12b         | 11b      | 10b      | 139           | 75       | 106      |
| 40    |      |     |       | SO <sub>2</sub> CH=CHAr                           | MeO               | 12c         | 11c      | 10c      | 114           | 102      | 137      |
| 41    |      |     |       | SO <sub>2</sub> CH=CHAr                           | MeO               | 12d         | 11d      | 10d      | 113           | 25       | 113      |
| 42    |      |     |       | SO <sub>2</sub> CH=CHAr                           | MeO               | 12e         | 11e      | 10e      | 119           | 25       | 93       |
| 43    |      |     |       | SO <sub>2</sub> CH=CHAr                           | MeO               | 12f         | 11f      | 10f      | 124           | 25       | 114      |
| 44    | 2013 | 56  | 7243  | OCH <sub>2</sub> Ar                               | F                 | 16j         | 16k      | 16l      | 280           | 152.8    | 280      |
| 45    | 2013 | 56  | 3783  | OCH <sub>2</sub> CONRR                            | Me                | 11p         | 11o      | 11m      | 98            | 25       | 136.5    |
| 46    | 2012 | 55  | 10909 | CH <sub>2</sub> NHCOR                             | F                 | 7           | 6        | 1        | 187.7         | 168.8    | 194      |
| 47    | 2012 | 55  | 10074 | (CH <sub>2</sub> ) <sub>7</sub> SO <sub>2</sub> F | BnO               | 20c         | 20b      | 20a      | 25            | 25       | 38       |
| 48    |      |     |       | (CH <sub>2</sub> ) <sub>7</sub> SO <sub>2</sub> F | HO                | 21c         | 21b      | 21a      | 25            | 25       | 51       |
| 49    | 2012 | 55  | 7614  | (CH <sub>2</sub> ) <sub>2</sub> Het               | MeO               | 5g          | 5h       | 5a       | 98            | 121      | 170      |
| 50    | 2012 | 55  | 6194  | OSO <sub>2</sub> Ar                               | Me                | 4           | 5        | 6        | 101           | 25       | 25       |
| 51    | 2012 | 55  | 5760  | (CH <sub>2</sub> ) <sub>2</sub> OAr               | Me                | 33b         | 33c      | 33d      | 122           | 111      | 191      |
| 52    |      |     |       | (CH <sub>2</sub> ) <sub>2</sub> OAr               | CF <sub>3</sub>   | 33e         | 33f      | 33g      | 91            | 92       | 181      |
| 53    |      |     |       | (CH <sub>2</sub> ) <sub>2</sub> OAr               | F                 | 33h         | 33i      | 33j      | 115           | 116      | 165      |
| 54    |      |     |       | (CH <sub>2</sub> ) <sub>2</sub> OAr               | Cl                | 33k         | 33l      | 33m      | 120           | 131      | 194      |
| 55    |      |     |       | (CH <sub>2</sub> ) <sub>2</sub> OAr               | Br                | 33n         | 33o      | 33p      | 120           | 135      | 156      |
| 56    | 2011 | 54  | 6432  | CH <sub>2</sub> NHCOR                             | CF <sub>3</sub> O | 15          | 16       | 17       | 55            | 25       | 64       |
| 57    |      |     |       | CH <sub>2</sub> NHCOR                             | CF <sub>3</sub> O | 44          | 45       | ref.8 49 | 134           | 104      | 102      |
| 58    |      |     |       | (CH <sub>2</sub> ) <sub>2</sub> NHCOR             | F                 | 56          | 57       | 58       | 52            | 25       | 25       |
| 59    |      |     |       | (CH <sub>2</sub> ) <sub>2</sub> NHCOR             | F                 | 60          | 61       | 62       | 133           | 132      | 133      |
| 60    | 2010 | 53  | 8619  | CH(NHCOAr)CH <sub>2</sub> CO <sub>2</sub> H       | F                 | 4A1         | 4A2      | 4A3      | 190.4         | 194.8    | 193.1    |

|     |      |    |      |                                                                                    |                                    |      |      |      |       |       |       |
|-----|------|----|------|------------------------------------------------------------------------------------|------------------------------------|------|------|------|-------|-------|-------|
| 61  |      |    |      | CH(NHCOAr)CH <sub>2</sub> CO <sub>2</sub> H                                        | Cl                                 | 4A4  | 4A5  | 4A6  | 213.9 | 156.1 | 222.3 |
| 62  |      |    |      | CH(NHCOAr)CH <sub>2</sub> CO <sub>2</sub> H                                        | MeO                                | 4A7  | 4A8  | 4A9  | 182   | 145   | 198.9 |
| 63  |      |    |      | CH(NHCOAr)CH <sub>2</sub> CO <sub>2</sub> H                                        | Me                                 | 4A13 | 4A14 | 4A15 | 190.8 | 130.1 | 216.1 |
| 64  |      |    |      | CH(NHCOAr)CH <sub>2</sub> CO <sub>2</sub> H                                        | F                                  | 4A17 | 4A18 | 4A19 | 168.2 | 168.5 | 165.3 |
| 65  | 2010 | 53 | 6228 | CH <sub>2</sub> Het                                                                | EtO                                | 25   | 26   | 27   | 25    | 25    | 64    |
| 66  |      |    |      | CH <sub>2</sub> Het                                                                | F(CH <sub>2</sub> ) <sub>2</sub> O | 28   | 29   | 30   | 25    | 25    | 78    |
| 67  |      |    |      | CH <sub>2</sub> Het                                                                | F(CH <sub>2</sub> ) <sub>3</sub> O | 34   | 35   | 36   | 25    | 25    | 60    |
| 68  |      |    |      | CH <sub>2</sub> Het                                                                | MeO                                | 11   | 12   | 13   | 25    | 84    | 94    |
| 69  |      |    |      | CH <sub>2</sub> Het                                                                | HO                                 | 19   | 20   | 21   | 127   | 125   | 149   |
| 70  | 2010 | 53 | 3756 | CH <sub>2</sub> OAr                                                                | F                                  | 21   | 10   | 22   | 174   | 152   | 167   |
| 71  | 2010 | 53 | 1288 | CH <sub>2</sub> NHCOR                                                              | F                                  | 4    | 5    | 6    | 175   | 151   | 145   |
| 72  |      |    |      | CH <sub>2</sub> NHCOR                                                              | CF <sub>3</sub> O                  | 7    | 8    | 9    | 131   | 148   | 135   |
| 73  | 2008 | 51 | 7144 | CH <sub>2</sub> OAr                                                                | Me                                 | 6    | 5    | 4    | 213   | 203   | 207   |
| 74  |      |    |      | CH <sub>2</sub> OAr                                                                | CH <sub>2</sub> NH <sub>2</sub>    | 3    | 2    | 1    | 170   | 160   | 185   |
| 75  | 2008 | 51 | 3203 | CH <sub>2</sub> CO <sub>2</sub> R                                                  | MeO                                | 6i   | 6j   | 6k   | 149   | 150   | 150   |
| 76  |      |    |      | (CH <sub>2</sub> ) <sub>2</sub> CO <sub>2</sub> R                                  | MeO                                | 6m   | 6n   | 6o   | 159   | 164   | 172   |
| 77  | 2008 | 51 | 1764 | CH <sub>2</sub> OAr                                                                | Cl                                 | 5k   | 5l   | 5m   | 99.8  | 99.5  | 126   |
| 78  | 2007 | 50 | 5579 | (CH <sub>2</sub> ) <sub>2</sub> NHAr                                               | Cl                                 | 3    | 4    | 5    | 100   | 123   | 100   |
| 79  |      |    |      | CH <sub>2</sub> NHAr                                                               | F                                  | 13   | 14   | 15   | 134   | 114   | 137   |
| 80  | 2007 | 50 | 3290 | (CH <sub>2</sub> ) <sub>2</sub> Ar                                                 | MeO                                | 4    | 3    | 2    | 140   | 127.5 | 156   |
| 81  |      |    |      | (CH <sub>2</sub> ) <sub>2</sub> Ar                                                 | MeO                                | 9    | 8    | 7    | 223   | 169   | 204.6 |
| 82  | 2007 | 50 | 807  | CH <sub>2</sub> OCOHet                                                             | Me                                 | 20h  | 20i  | 20j  | 25    | 25    | 100   |
| 83  |      |    |      | CH <sub>2</sub> OCOHet                                                             | F                                  | 20e  | 20f  | 20g  | 47    | 71    | 127   |
| 84  | 2006 | 49 | 1433 | CH <sub>2</sub> OAr                                                                | F                                  | 11a  | 11e  | 11l  | 108   | 121   | 102   |
| 85  |      |    |      | CH <sub>2</sub> OAr                                                                | Cl                                 | 11b  | 11f  | 11m  | 86    | 111   | 108   |
| 86  |      |    |      | CH <sub>2</sub> OAr                                                                | F                                  | 14a  | 14e  | 14k  | 92    | 91    | 100   |
| 87  |      |    |      | CH <sub>2</sub> OAr                                                                | Cl                                 | 14b  | 14f  | 14l  | 107   | 108   | 110   |
| 88  | 2006 | 49 | 947  | SO <sub>2</sub> Ar                                                                 | MeO                                | 18   | 20   | 22   | 250   | 173   | 232   |
| 89  | 2005 | 48 | 7750 | O(CH <sub>2</sub> ) <sub>2</sub> NH(CH <sub>2</sub> ) <sub>2</sub> OAr             | Cl                                 | 5    | 6    | 7    | 165   | 136   | 162   |
| 90  |      |    |      | O(CH <sub>2</sub> ) <sub>2</sub> NH(CH <sub>2</sub> ) <sub>2</sub> OAr             | Me                                 | 8    | 9    | 10   | 156   | 127   | 146   |
| 91  | 2005 | 48 | 7172 | (CH <sub>2</sub> ) <sub>2</sub> NHAr                                               | F                                  | 3c   | 3d   | 3e   | 114   | 97    | 92    |
| 92  |      |    |      | (CH <sub>2</sub> ) <sub>2</sub> NHAr                                               | Cl                                 | 3f   | 3g   | 3h   | 120   | 91    | 112   |
| 93  |      |    |      | (CH <sub>2</sub> ) <sub>2</sub> NHAr                                               | Cl                                 | 5i   | 5j   | 5k   | 115   | 100   | 106   |
| 94  | 2005 | 48 | 1367 | OCH <sub>2</sub> Ar                                                                | CN                                 | 53   | 54   | 55   | 226   | 217   | 226   |
| 95  | 2005 | 48 | 1237 | CH <sub>2</sub> OCMe <sub>2</sub> Ar                                               | MeO                                | 5b   | 5c   | 5d   | 202.5 | 171.3 | 200.2 |
| 96  | 2004 | 47 | 4570 | CH <sub>2</sub> Ocb                                                                | Cl                                 | 11aj | 11ak | 11al | 195   | 220   | 220   |
| 97  | 2004 | 47 | 3546 | CH <sub>2</sub> OAr                                                                | Cl                                 | 15   | 16   | 17   | 109   | 123   | 149   |
| 98  | 2004 | 47 | 1807 | CH <sub>2</sub> OAr                                                                | MeO                                | 21   | 22   | 23   | 210   | 191   | 167   |
| 99  |      |    |      | CH <sub>2</sub> OAr                                                                | Cl                                 | 18   | 19   | 20   | 247   | 229   | 205   |
| 100 | 2001 | 44 | 3195 | CH <sub>2</sub> OAr                                                                | Me                                 | 2    | 3    | 9    | 145   | 114   | 123   |
| 101 | 2000 | 43 | 4747 | CH <sub>2</sub> OAr                                                                | Me                                 | 49   | 51   | 62   | 145   | 114   | 123   |
| 102 | 2000 | 43 | 4667 | OCH <sub>2</sub> Ar                                                                | Cl                                 | 20   | 19   | 18   | 165   | 149   | 245   |
| 103 | 2000 | 43 | 2946 | (CH <sub>2</sub> ) <sub>2</sub> C(CH <sub>2</sub> OH) <sub>2</sub> NH <sub>2</sub> | <i>n</i> -Octyl                    | 25   | 26   | 6    | 159   | 98    | 108   |
| 104 | 1999 | 42 | 3412 | (CH <sub>2</sub> ) <sub>2</sub> NHCOR                                              | HO                                 | 33   | 32   | 27   | 179   | 142   | 167   |
| 105 | 1999 | 42 | 1789 | OCH <sub>2</sub> CONHR                                                             | Me                                 | 12b  | 12c  | 12d  | 72    | 60    | 70    |
| 106 |      |    |      | CH <sub>2</sub> NHCOHet                                                            | Me                                 | 21c  | 21d  | 21e  | 115   | 117   | 116   |
| 107 | 1998 | 41 | 2972 | OCH <sub>2</sub> Ar                                                                | HO                                 | 9    | 10   | 11   | 173   | 220   | 200   |
| 108 |      |    |      | OCH <sub>2</sub> Ar                                                                | F                                  | 12   | 13   | 14   | 110   | 105   | 144   |
| 109 | 1998 | 41 | 503  | CH <sub>2</sub> OAr                                                                | F                                  | 3    | 4    | 5    | 224   | 204   | 199   |
| 110 | 1990 | 33 | 1818 | O(CH <sub>2</sub> ) <sub>4</sub> NMe <sub>2</sub>                                  | phenethyl                          | 7c   | 8a   | 8b   | 118   | 129   | 171   |
| 111 |      |    |      | (CH <sub>2</sub> ) <sub>2</sub> Ar                                                 | Cl                                 | 9e   | 9h   | 9j   | 123   | 94    | 154   |
| 112 | 1987 | 30 | 1348 | CH <sub>2</sub> OAr                                                                | Cl                                 | 35   | 27   | 25   | 70.5  | 150   | 181   |
| 113 | 1985 | 28 | 1436 | (CH <sub>2</sub> ) <sub>2</sub> NHR                                                | Me                                 | 23   | 24   | 25   | 92    | 165   | 70    |
| 114 | 1979 | 22 | 352  | CH <sub>2</sub> NRR                                                                | Me                                 | 5    | 7    | 9    | 148.5 | 159.5 | 175   |
| 115 | 1978 | 21 | 1073 | OCH <sub>2</sub> CH(OH)CH <sub>2</sub> Ar                                          | Cl                                 | 11   | 10   | 5    | 200   | 174   | 201   |
| 116 | 1977 | 20 | 1653 | O(CH <sub>2</sub> ) <sub>2</sub> NHR                                               | Me                                 | 8    | 9    | 10   | 100   | 168   | 113   |
| 117 |      |    |      | O(CH <sub>2</sub> ) <sub>2</sub> NHR                                               | Cl                                 | 18   | 19   | 20   | 152   | 172   | 125   |
| 118 | 1970 | 13 | 968  | OCH <sub>2</sub> Ar                                                                | Cl                                 | 2    | 3    | 4    | 201   | 154   | 190   |

Red and blue figures indicate the lowest and the highest melting point among the three regioisomers, respectively. Ar, aromatic; Het, nonaromatic heterocycle; Cb, aliphatic carbocycle.

Supplementary Table 9. HPLC conditions for the purity check

| comp.     | mobile phase       |    |                                           |    | UV<br>detection<br>(nm) |
|-----------|--------------------|----|-------------------------------------------|----|-------------------------|
|           | 1                  | %  | 2                                         | %  |                         |
| <b>1a</b> | MeOH               | 70 | H <sub>2</sub> O                          | 30 | 242                     |
| <b>1b</b> | MeOH               | 70 | H <sub>2</sub> O                          | 30 | 230                     |
| <b>1c</b> | MeOH               | 70 | H <sub>2</sub> O                          | 30 | 242                     |
| <b>2a</b> | MeOH               | 35 | H <sub>2</sub> O                          | 65 | 268                     |
| <b>2b</b> | MeOH               | 20 | H <sub>2</sub> O                          | 80 | 268                     |
| <b>2c</b> | MeOH               | 20 | H <sub>2</sub> O                          | 80 | 268                     |
| <b>3a</b> | CH <sub>3</sub> CN | 35 | H <sub>2</sub> O                          | 65 | 262                     |
| <b>3b</b> | CH <sub>3</sub> CN | 35 | H <sub>2</sub> O                          | 65 | 262                     |
| <b>3c</b> | CH <sub>3</sub> CN | 35 | H <sub>2</sub> O                          | 65 | 262                     |
| <b>4a</b> | MeOH               | 20 | 0.02M<br>NH <sub>4</sub> HCO <sub>2</sub> | 80 | 254                     |
| <b>4b</b> | MeOH               | 20 | 0.02M<br>NH <sub>4</sub> HCO <sub>2</sub> | 80 | 254                     |
| <b>4c</b> | MeOH               | 20 | 0.02M<br>NH <sub>4</sub> HCO <sub>2</sub> | 80 | 254                     |
| <b>5a</b> | CH <sub>3</sub> CN | 40 | H <sub>2</sub> O                          | 60 | 242                     |
| <b>5b</b> | CH <sub>3</sub> CN | 40 | H <sub>2</sub> O                          | 60 | 242                     |
| <b>5c</b> | CH <sub>3</sub> CN | 40 | H <sub>2</sub> O                          | 60 | 242                     |
| <b>6a</b> | CH <sub>3</sub> CN | 50 | 0.1% TFA                                  | 50 | 262                     |
| <b>6b</b> | CH <sub>3</sub> CN | 50 | 0.1% TFA                                  | 50 | 242                     |
| <b>6c</b> | CH <sub>3</sub> CN | 50 | 0.1% TFA                                  | 50 | 236                     |
| <b>7a</b> | CH <sub>3</sub> CN | 60 | 0.1% TFA                                  | 40 | 232                     |
| <b>7b</b> | CH <sub>3</sub> CN | 60 | 0.1% TFA                                  | 40 | 232                     |
| <b>7c</b> | CH <sub>3</sub> CN | 60 | 0.1% TFA                                  | 40 | 232                     |

| comp.      | mobile phase       |    |                  |    | UV                |
|------------|--------------------|----|------------------|----|-------------------|
|            | 1                  | %  | 2                | %  | detection<br>(nm) |
| <b>8a</b>  | CH <sub>3</sub> CN | 70 | H <sub>2</sub> O | 30 | 320               |
| <b>8b</b>  | CH <sub>3</sub> CN | 70 | H <sub>2</sub> O | 30 | 320               |
| <b>8c</b>  | CH <sub>3</sub> CN | 70 | H <sub>2</sub> O | 30 | 320               |
| <b>9a</b>  | CH <sub>3</sub> CN | 70 | H <sub>2</sub> O | 30 | 270               |
| <b>9b</b>  | CH <sub>3</sub> CN | 70 | H <sub>2</sub> O | 30 | 280               |
| <b>9c</b>  | CH <sub>3</sub> CN | 70 | H <sub>2</sub> O | 30 | 240               |
| <b>10a</b> | CH <sub>3</sub> CN | 50 | H <sub>2</sub> O | 50 | 271               |
| <b>10b</b> | CH <sub>3</sub> CN | 50 | H <sub>2</sub> O | 50 | 271               |
| <b>10c</b> | CH <sub>3</sub> CN | 50 | H <sub>2</sub> O | 50 | 271               |
| <b>11a</b> | CH <sub>3</sub> CN | 60 | H <sub>2</sub> O | 40 | 272               |
| <b>11b</b> | CH <sub>3</sub> CN | 60 | H <sub>2</sub> O | 40 | 272               |
| <b>11c</b> | CH <sub>3</sub> CN | 60 | H <sub>2</sub> O | 40 | 272               |
| <b>12a</b> | CH <sub>3</sub> CN | 50 | H <sub>2</sub> O | 50 | 271               |
| <b>12b</b> | CH <sub>3</sub> CN | 50 | H <sub>2</sub> O | 50 | 275               |
| <b>12c</b> | CH <sub>3</sub> CN | 50 | H <sub>2</sub> O | 50 | 271               |
| <b>13a</b> | CH <sub>3</sub> CN | 50 | H <sub>2</sub> O | 50 | 271               |
| <b>13b</b> | CH <sub>3</sub> CN | 50 | H <sub>2</sub> O | 50 | 271               |
| <b>13c</b> | CH <sub>3</sub> CN | 50 | H <sub>2</sub> O | 50 | 271               |
| <b>14a</b> | CH <sub>3</sub> CN | 50 | H <sub>2</sub> O | 50 | 275               |
| <b>14b</b> | CH <sub>3</sub> CN | 50 | H <sub>2</sub> O | 50 | 275               |
| <b>14c</b> | CH <sub>3</sub> CN | 50 | H <sub>2</sub> O | 50 | 275               |
| <b>15a</b> | CH <sub>3</sub> CN | 50 | H <sub>2</sub> O | 50 | 275               |
| <b>15b</b> | CH <sub>3</sub> CN | 50 | H <sub>2</sub> O | 50 | 275               |
| <b>15c</b> | CH <sub>3</sub> CN | 50 | H <sub>2</sub> O | 50 | 268               |
| <b>16</b>  | CH <sub>3</sub> CN | 50 | H <sub>2</sub> O | 50 | 271               |



HPLC analyses to check purity were performed on an analytical column (GL Science Inc. Inertsil ODS-4 reversed-phase column, 5  $\mu\text{m}$ , 4.6 mm x 150 mm) at 37 °C. Flow rate was 1 mL/min.

Supplementary Figure 1. <sup>1</sup>H NMR charts of bicalutamide analogs 10-16

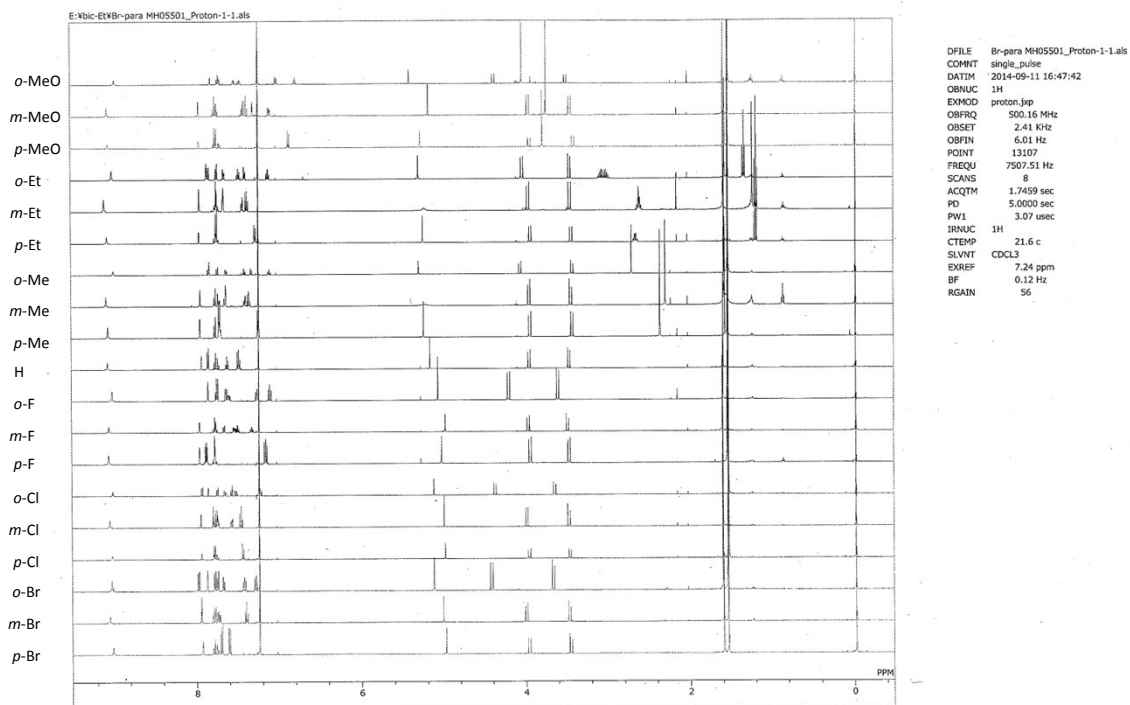

## Experimental Section

### Chemistry

#### General

Melting points were determined on a Yanagimoto hot-stage melting point apparatus and are uncorrected. <sup>1</sup>H NMR spectra were recorded on a JEOL JNM-ECA500 (500 MHz) spectrometer. <sup>13</sup>C NMR spectra were recorded on JEOL JNM-ECA500 (125 MHz) spectrometer. Chemical shifts are expressed in parts per million relative to tetramethylsilane (TMS) with coupling constants in Hz. Fast atom bombardment mass spectra (FAB-MS) were recorded on a JEOL JMS-HX110 spectrometer with *m*-nitrobenzyl alcohol as a matrix. Electrospray ionization mass spectra (ESI-MS) were recorded on a Bruker micrOTOF II spectrometer. Infrared spectra (FT-IR) were recorded on a JASCO FT/IR-470 PLUS spectrometer. The FT-IR spectra were assigned with the aid of DFT predictions (Gaussian 09, M062X/6-31G\*). Flash column chromatography was performed on silica gel 60N Kanto Kagaku (40–50 mm). HPLC analyses to check purity were performed on an analytical column (GL Science Inc. Inertsil ODS-4 reversed-phase column, 5 μm, 4.6 mm x 150 mm, MeOH or CH<sub>3</sub>CN / H<sub>2</sub>O, 0.02M NH<sub>4</sub>HCO<sub>2</sub> or 0.01% TFA, flow rate 1.0 mL/min, 37 °C; Supplementary Table 8). The purity of all compounds evaluated here was confirmed to be >95%.

#### Preparation of disubstituted benzenes 1-7

##### 2-Bromobenzonitrile (1a)

2-Bromobenzonitrile was recrystallized from EtOH/water to afford white needles.

<sup>1</sup>H NMR (500 MHz, CDCl<sub>3</sub>) δ: 7.69 (dd, 1H, *J* = 8.0, 1.2 Hz), 7.66 (dd, 1H, *J* = 7.5, 2.2 Hz), 7.46 (ddd, 1H, *J* = 7.9, 7.9, 2.0 Hz), 7.42 (ddd, 1H, *J* = 7.7, 7.7, 1.4 Hz). Elem. Anal. Calcd for C<sub>7</sub>H<sub>4</sub>BrN: C, 46.09; H, 2.22; N, 7.70. Found: C 46.19, H 2.31, N 7.58. IR (KBr, cm<sup>-1</sup>): 2224 (CN, m), 1584 (m), 1466 (m), 1435 (m), 1044 (m), 757 (CH, CH-wag, s). Purity: 100% (HPLC area %).

##### 3-Bromobenzonitrile (1b)

3-Bromobenzonitrile was recrystallized from EtOH/water to afford white needles.

<sup>1</sup>H NMR (500 MHz, CDCl<sub>3</sub>) δ: 7.79 (dd, 1H, *J* = 1.7, 1.7 Hz), 7.74 (br d, 1H, *J* = 8.0 Hz), 7.60 (ddd, 1H, *J* = 8.0, 1.29, 1.29 Hz), 7.36 (dd, 1H, *J* = 8.0 Hz). Elem. Anal. Calcd for C<sub>7</sub>H<sub>4</sub>BrN: C, 46.09; H, 2.22; N, 7.70. Found: C 45.90, H 2.31, N 7.58. IR (KBr, cm<sup>-1</sup>): 2230 (CN, m), 1559 (m), 1466 (m), 1409 (m), 1189 (m), 1076 (m), 894 (m), 784 (m), 675 (packer, m). Purity: 100% (HPLC area %).

#### 4-Bromobenzonitrile (1c)

4-Bromobenzonitrile was recrystallized from EtOH/water to afford white needles.

<sup>1</sup>H NMR (500 MHz, CDCl<sub>3</sub>) δ: 7.63 (ddd, 2H, *J* = 8.6, 2.3, 2.3 Hz), 7.52 (ddd, 2H, *J* = 8.6, 2.3, 2.3 Hz). Elem. Anal. Calcd for C<sub>7</sub>H<sub>4</sub>BrN: C, 46.09; H, 2.22; N, 7.70. Found: C 45.86, H 2.39, N 7.55. IR (KBr, cm<sup>-1</sup>): 2224 (CN, m), 1584 (m), 1479 (m), 1067 (m), 1013 (m), 824 (CH, CH-wag, s). Purity: 100% (HPLC area %).

#### 1,2-Bis(methanesulfonyl)benzene (2a)

A mixture of 1,2-dithiophenol (345 mL, 3.00 mmol) and K<sub>2</sub>CO<sub>3</sub> (445 mg, 3.00 mmol) in CH<sub>2</sub>Cl<sub>2</sub> (15 mL) was stirred at 0 °C. After 5 min, triethylamine (776 mg, 6.00 mmol) and iodomethane (557 μL, 9.00 mmol) were added. After 4.5 h, 2 M HCl (20 mL) was added, and the mixture was extracted with CH<sub>2</sub>Cl<sub>2</sub> (20 mL). The organic layer was washed with brine (20 mL), dried over Na<sub>2</sub>SO<sub>4</sub>, and concentrated. The residue was purified by silica gel column chromatography (AcOEt/hexane) to afford 1,2-bis(methylsulfonyl)benzene (489 mg, 96%) as a yellow oil. To a suspension of 1,2-bis(methylsulfonyl)benzene (488 mg, 2.90 mmol) in water (20 mL) was added oxone (2760 mg, 4.30 mmol). The mixture was stirred at 60 °C for 8.5 h, then extracted with CH<sub>2</sub>Cl<sub>2</sub> (15 mL) 3 times. The organic layer was dried over Na<sub>2</sub>SO<sub>4</sub>, and concentrated. The crude residue was purified by recrystallization from EtOH/water to afford **2a** as white columnar crystals (408 mg, 61%).

<sup>1</sup>H NMR (500 MHz, CDCl<sub>3</sub>) δ: 8.35 (dd, 2H, *J* = 5.7, 3.4 Hz), 7.87 (dd, 2H, *J* = 5.7, 3.4 Hz), 3.43 (6H, s). HRMS (ESI-TOF) *m/z* (M-H)<sup>-</sup> calcd. for 232.9937; Found 232.9950, Elem. Anal. Calcd for C<sub>8</sub>H<sub>10</sub>S<sub>2</sub>O<sub>4</sub>: C, 41.01; H, 4.30, Found: C 40.92, H 4.33. IR (KBr, cm<sup>-1</sup>): 3432 (CH, aliphatic, br), 1294 (SO<sub>2</sub>, s), 1152 (SO<sub>2</sub>, s), 764 (CH, CH-wag, m). Purity: 99.1% (HPLC area %).

#### 1,3-Bis(methanesulfonyl)benzene (2b)

1,3-Bis(methanesulfonyl)benzene was recrystallized from EtOH/water to afford white plates.

<sup>1</sup>H NMR (500 MHz, CDCl<sub>3</sub>) δ: 8.53 (t, 1H, *J* = 1.7 Hz), 8.24 (dd, 2H, *J* = 8.0, 1.7 Hz), 7.83 (t, 1H, *J* = 7.7 Hz), 3.12 (s, 6H). HRMS (ESI-TOF) *m/z* (M-H)<sup>-</sup> calcd. for 232.9937; Found 232.9923, Elem. Anal. Calcd for C<sub>8</sub>H<sub>10</sub>S<sub>2</sub>O<sub>4</sub>: C, 41.01; H, 4.30, Found: C 40.94, H 4.24. IR (KBr, cm<sup>-1</sup>): 3464 (CH, aliphatic, br), 1302 (SO<sub>2</sub>, s), 1135 (SO<sub>2</sub>, s), 675 (packer, m). Purity: 99.7% (HPLC area %).

#### 1,4-Bis(methanesulfonyl)benzene (2c)<sup>1</sup>

4-Bromothioanisole (1020 mg, 5.00 mmol), CuI (241 mg, 1.25 mmol), Cu(OAc)<sub>2</sub> (1830 mg, 10.0 mmol) were stirred in dry DMSO in a sealed tube at 160 °C. After 24 h, AcOEt (30 mL) was added, and the precipitate was removed by filtration. Water (150 mL) was added to the filtrate, and the mixture was extracted with ethyl acetate (20 mL). The organic layer was washed with brine (20 mL) twice, dried over Na<sub>2</sub>SO<sub>4</sub>, and concentrated. The residue was recrystallized from EtOH/water twice to afford 1,4-bis(methylsulfanyl)benzene as white crystals (349 mg, 41%). A suspension of 1,4-bis(methylsulfanyl)benzene (256 mg, 1.51 mmol) in water (20 mL) was treated with oxone (1500 mg, 2.34 mmol) at 60 °C for 5.5 h, then extracted with CH<sub>2</sub>Cl<sub>2</sub> (12 mL) twice. The combined organic layer was dried over Na<sub>2</sub>SO<sub>4</sub>, and concentrated. The residue was purified by recrystallization from EtOH/water to afford **2c** (248 mg, 70%) as white plates.

<sup>1</sup>H NMR (500 MHz, CDCl<sub>3</sub>) δ: 8.17 (s, 4H), 3.11 (s, 6H). HRMS (ESI-TOF) *m/z* (M-H)<sup>-</sup> calcd. for 232.9937; Found 232.9954. Elem. Anal. Calcd for C<sub>8</sub>H<sub>10</sub>S<sub>2</sub>O<sub>4</sub>: C, 41.01; H, 4.30, Found: C 40.93, H 4.39. IR (KBr, cm<sup>-1</sup>): 3466 (CH, aliphatic, br), 1318 (SO<sub>2</sub>, s), 1155 (s), 963 (s), 840 (CH, CH-wag, m), 755 (s). Purity: 100% (HPLC area %).

### 2-Toluenesulfonamide (3a)

2-Toluenesulfonamide was recrystallized from hexane/AcOEt to afford white crystals.

<sup>1</sup>H NMR (500 MHz, CDCl<sub>3</sub>) δ: 8.02 (d, 1H, *J* = 8.6 Hz), 7.47 (dd, 1H, *J* = 8.6, 7.4 Hz), 7.33 (d, 1H, *J* = 7.4 Hz), 7.32 (dd, 1H, *J* = 7.4, 7.4 Hz), 4.88-4.76 (m, 2H) 2.69 (s, 3H). HRMS (ESI-TOF) *m/z* (M-H)<sup>-</sup> calcd. for 170.0270; Found 170.0258, Elem. Anal. Calcd for C<sub>7</sub>H<sub>9</sub>NSO<sub>2</sub>: C, 49.11; H, 5.30, N, 8.18 Found: 49.12; H, 5.32, N, 8.16. IR (KBr, cm<sup>-1</sup>): 3382 (NH<sub>2</sub>, s), 3261 (NH<sub>2</sub>, s) 1315 (SO<sub>2</sub>, s), 1152 (SO<sub>2</sub>, s), 767 (CH, CH-wag, m). Purity: 99.5% (HPLC area %).

### 3-Toluenesulfonamide (3b)

NH<sub>3</sub> aq (ca. 28%, 3.0 mL) was added to a stirred solution of 3-toluenesulfonyl chloride (787 mg, 4.13 mmol) in acetone (4.0 mL) at 0 °C, and then the reaction mixture was stirred for 3.5 h at rt in a sealed tube. To remove excess NH<sub>3</sub>, the reaction mixture was stirred for 2 h at rt after the tube had been opened. The reaction mixture was quenched with H<sub>2</sub>O and partitioned. The organic layer was washed with H<sub>2</sub>O, dried over MgSO<sub>4</sub>, and concentrated. The resulting residue was purified by silica gel chromatography (hexane/AcOEt = 3/2) to afford **3b** (580 mg, 3.39 mmol, 82%) as a white solid. This sample was recrystallized from AcOEt/hexane to afford as colorless plates.

<sup>1</sup>H NMR (500 MHz, CDCl<sub>3</sub>) δ: 7.78-7.70 (m, 2H), 7.45-7.37 (m, 2H), 4.84-4.67 (m, 2H) 2.44 (s, 3H).. HRMS (ESI-TOF) *m/z* (M-H)<sup>-</sup> calcd. for 170.0270; Found 170.0269, Elem. Anal. Calcd for C<sub>7</sub>H<sub>9</sub>NSO<sub>2</sub>: C, 49.11; H, 5.30, N, 8.18 Found: 48.91; H, 5.30, N, 8.05. IR (KBr, cm<sup>-1</sup>): 3323 (NH<sub>2</sub>, s), 3238 (NH<sub>2</sub>, s) 1330 (SO<sub>2</sub>, s), 1159 (SO<sub>2</sub>, s), 687 (packer, m). Purity: 99.6% (HPLC area %).

#### **4-Toluenesulfonamide (3c)**

4-Toluenesulfonamide was recrystallized from hexane/AcOEt to afford white crystals.

<sup>1</sup>H NMR (500 MHz, CDCl<sub>3</sub>) δ: 7.82 (d, 2H, *J* = 8.0 Hz), 7.32 (d, 2H, *J* = 8.0 Hz), 4.85-4.72 (m, 2H) 2.44 (s, 3H) HRMS (ESI-TOF) *m/z* (M-H)<sup>-</sup> calcd. for 170.0270; Found 170.0263, Elem. Anal. Calcd for C<sub>7</sub>H<sub>9</sub>NSO<sub>2</sub>: C, 49.11; H, 5.30, N, 8.18 Found: 49.11; H, 5.29, N, 7.98. IR (KBr, cm<sup>-1</sup>): 3327 (NH<sub>2</sub>, s), 3241 (NH<sub>2</sub>, s) 1327 (SO<sub>2</sub>, s), 1151 (SO<sub>2</sub>, s), 809 (CH, CH-wag, m). Purity: 99.0% (HPLC area %).

#### **1,2-Phenylenediamine (4a)**

1,2-Phenylenediamine was recrystallized from hexane/AcOEt to afford colorless plates. This sample was kept shielded from direct light.

<sup>1</sup>H NMR (500 MHz, CDCl<sub>3</sub>) δ: 6.79-6.63 (m, 4H), 3.50-3.26 (m, 4H). HRMS (ESI-TOF) *m/z* (M+H)<sup>+</sup> calcd. for 109.0760; Found 109.0734, Elem. Anal. Calcd for C<sub>6</sub>H<sub>6</sub>N<sub>2</sub>: C 66.64, H 7.46, N25.90, Found: C 66.88, H 7.57, N25.75. IR (KBr, cm<sup>-1</sup>): 3385 (NH<sub>2</sub>, s), 3364 (NH<sub>2</sub>, s) 1631 (m), 1592 (m), 1500 (s), 1458 (m), 1274 (s), 748 (CH, CH-wag, m). Purity: 100% (HPLC area %).

#### **1,3-Phenylenediamine (4b)**

1,3-Phenylenediamine was recrystallized from hexane/AcOEt to afford white needles. This sample was kept shielded from direct light.

<sup>1</sup>H NMR (500 MHz, CDCl<sub>3</sub>) δ: 6.94 (t, 1H, *J* = 7.6 Hz), 6.12 (dd, 2H, *J* = 7.6, 2.2 Hz), 6.03 (t, 1H, *J* = 2.2 Hz), 3.70-3.43 (m, 4H). HRMS (ESI-TOF) *m/z* (M+H)<sup>+</sup> calcd. for 109.0760; Found 109.0737, Elem. Anal. Calcd for C<sub>6</sub>H<sub>6</sub>N<sub>2</sub>: C 66.64, H 7.46, N25.90, Found: C 66.72, H 7.58, N25.79. IR (KBr, cm<sup>-1</sup>): 3395 (NH<sub>2</sub>, s), 3326 (NH<sub>2</sub>, s), 1603 (br), 1493 (br), 1196 (m), 1159 (m), 841 (m), 781 (m), 687 (packer, m). Purity: 100% (HPLC area %).

#### **1,4-Phenylenediamine (4c)**

1,4-Phenylenediamine was recrystallized from AcOEt to afford pale pink plates. This sample was kept shielded from direct light.

<sup>1</sup>H NMR (500 MHz, CDCl<sub>3</sub>) δ: 6.57 (s, 4H), 3.41-3.24 (m, 4H). HRMS (ESI-TOF) *m/z* (M+H)<sup>+</sup> calcd. for 109.0760; Found 109.0735, Elem. Anal. Calcd for C<sub>6</sub>H<sub>6</sub>N<sub>2</sub>: C 66.64, H 7.46, N25.90, Found: C 66.94, H 7.60, N25.91. IR (KBr, cm<sup>-1</sup>): 3410 (NH<sub>2</sub>, s), 3374 (NH<sub>2</sub>, s) 1630 (m), 1516 (br), 1263 (s), 833 (CH, CH-wag, m), 717 (br). Purity: 100% (HPLC area %).

### 2-Bromoacetanilide (5a)

2-Bromoacetanilide was recrystallized from H<sub>2</sub>O/EtOH to afford white needles.

<sup>1</sup>H NMR (500 MHz, CDCl<sub>3</sub>) δ: 8.33 (d, *J* = 8.0 Hz, 1H), 7.60 (br s, 1H), 7.52 (d, *J* = 8.0 Hz, 1H), 7.31 (br dd, *J* = 7.7, 7.7 Hz, 1H), 6.97 (dd, *J* = 7.4, 7.4 Hz, 1H), 2.23 (s, 3H). HRMS (ESI-TOF) *m/z* (M+H)<sup>+</sup> calcd. for 213.9862; Found 213.9857. Elem. Anal. Calcd for C<sub>8</sub>H<sub>8</sub>NBrO: C 44.89, H 3.77, N6.54, Found: C 44.86, H 3.79, N6.54. IR (KBr, cm<sup>-1</sup>): 3475 (NH, br), 3278 (CH<sub>3</sub>, s) 1660 (CO, s), 1532 (m), 1298 (m), 762 (CH, CH-wag, m). Purity: 100% (HPLC area %).

### 3-Bromoacetanilide (5b)

A mixture of 3-bromoaniline (869 mg, 5.05 mmol), Ac<sub>2</sub>O (540 mg, 5.29 mmol), DMAP (61.0 mg, 0.500 mmol) in toluene (10 mL) was stirred at room temperature overnight. Saturated NaHCO<sub>3</sub>.aq. was added, and the mixture was extracted with AcOEt. The organic layer was dried over Na<sub>2</sub>SO<sub>4</sub> and concentrated. A mixture was recrystallized from hexane/AcOEt to afford **5b** (412 mg, 38 %) as colorless yellow needles.

<sup>1</sup>H NMR (500 MHz, CDCl<sub>3</sub>) δ: 7.75 (br s, 1H), 7.40 (br d, *J* = 8.0 Hz, 1H), 7.21 (br d, *J* = 8.0 Hz, 1H), 7.16 (dd, *J* = 8.0, 8.0 Hz, 1H), 2.17 (s, 3H). HRMS (ESI-TOF) *m/z* (M+H)<sup>+</sup> calcd. for 213.9862; Found 213.9857, Elem. Anal. Calcd for C<sub>8</sub>H<sub>8</sub>NBrO: C 44.89, H 3.77, N6.54, Found: C 44.53, H 3.80, N6.53. IR (KBr, cm<sup>-1</sup>): 3294 (s) 3249 (s), 3181 (m), 3112 (m), 3077 (m), 1686 (s), 1666 (s), 1592 (s), 1543 (s), 1473 (s), 1418 (s), 1311 (m), 1281 (m), 777 (m), 680 (packer, m). Purity: 100% (HPLC area %).

### 4-Bromoacetanilide (5c)

4-Bromoacetanilide was recrystallized from AcOEt to afford white needles.

<sup>1</sup>H NMR (500 MHz, CDCl<sub>3</sub>) δ: 7.44-7.37 (m, 4H), 7.21 (br s, 1H), 2.02 (s, 3H). HRMS (ESI-TOF) *m/z* (M+H)<sup>+</sup> calcd. for 213.9862; Found 213.9859, Elem. Anal. Calcd for C<sub>8</sub>H<sub>8</sub>NBrO: C 44.89, H 3.77, N6.54,

Found: C 44.92, H 3.85, N6.53. 3511 (NH, br), 3294 (s) 3260 (s), 3187 (m), 3115 (m), 1669 (CO, s), 1602 (s), 1586 (s), 1533 (s), 1487 (s), 1394 (s), 1308 (s), 1255 (s), 1096 (s), 1008 (s), 831 (CH, CH-wag, s), 820 (s), 741 (s). Purity: 100% (HPLC area %).

### 2-Toluic acid (6a)

2-Toluic acid was recrystallized from H<sub>2</sub>O/EtOH to afford white needles.

<sup>1</sup>H NMR (500 MHz, DMSO-*d*<sub>6</sub>) δ: 7.77 (br d, 1H, *J* = 8.0 Hz), 7.40 (ddd, *J* = 7.4, 7.4, 1.2 Hz, 1H), 7.26 (d, H, *J* = 6.9 Hz), 7.24 (dd, H, *J* = 8.0, 7.5 Hz), 2.45 (s, 3H). HRMS (ESI-TOF) *m/z* (M-H)<sup>-</sup> calcd. for 135.0441; Found 135.0432. Elem. Anal. Calcd for C<sub>8</sub>H<sub>8</sub>O<sub>2</sub>: C 70.57, H 5.92, Found: C 70.18, H 5.83. IR (KBr, cm<sup>-1</sup>): 2972 (OH, br), 1920 (CO, s), 1408 (m), 1316 (s), 1272 (s), 1088 (m), 916 (m), 471 (CH, CH-wag, m). Purity: 99.9% (HPLC area %).

### 3-Toluic acid (6b)

3-Toluic acid was recrystallized from H<sub>2</sub>O/EtOH to afford faintly yellow needles.

<sup>1</sup>H NMR (500 MHz, DMSO-*d*<sub>6</sub>) δ: 7.73 (br s, H), 7.70 (br d, 1H, *J* = 7.5 Hz), 7.39 (br d, 1H, *J* = 7.5 Hz), 7.34 (dd, 1H, *J* = 7.4, 7.4 Hz), 2.32 (s, 3H). HRMS (ESI-TOF) *m/z* (M-H)<sup>-</sup> calcd. for 135.0441; Found 135.0432. Elem. Anal. Calcd for C<sub>8</sub>H<sub>8</sub>O<sub>2</sub>: C 70.57, H 5.92, Found: C 70.36, H 6.00. IR (KBr, cm<sup>-1</sup>): 2925 (OH, br), 1687 (CO, s), 1433 (s), 1416 (s), 1311 (s), 1283 (s), 1215 (s), 931 (m), 747 (CH, CH-wag, m). Purity: 100% (HPLC area %).

### 4-Toluic acid (6c)

4-Toluic acid was recrystallized from H<sub>2</sub>O/EtOH to afford faintly yellow needles.

<sup>1</sup>H NMR (500 MHz, DMSO-*d*<sub>6</sub>) δ: 7.80 (br d, 2H, *J* = 8.0 Hz), 7.25 (d, 2H, *J* = 8.0 Hz), 2.32 (s, 3H). HRMS (ESI-TOF) *m/z* (M-H)<sup>-</sup> calcd. for 135.0441; Found 135.0427, Elem. Anal. Calcd for C<sub>8</sub>H<sub>8</sub>O<sub>2</sub>: C 70.57, H 5.92, Found: C 70.25, H 5.93. IR (KBr, cm<sup>-1</sup>): 2979 (OH, br), 1680 (CO, s), 1611 (s), 1577 (s), 1418 (s), 1322 (s), 1183 (s), 1118 (s), 961 (m), 949 (m), 840 (m), 755 (CH, CH-wag, m). Purity: 100% (HPLC area %).

### 2-*tert*-Butylbenzoic acid (7a)<sup>3</sup>

To a stirred solution of 2-fluorobenzoic acid (426 mg, 2.50 mmol) in anhydrous THF (10 mL) at -78 °C was added dropwise *t*-BuLi (3.20 mL, 5.00 mmol). After 2 h, 1 M HCl (20 mL) was added, and the mixture was



warmed to room temperature, and extracted with AcOEt (20 mL) 2 times. The organic layer was washed with brine (20 mL), dried over Na<sub>2</sub>SO<sub>4</sub> and concentrated. The crude product was purified by column chromatography (hexane/AcOEt) followed by recrystallization (EtOH/water) to afford **7a** (170 mg, 39%) as white needles.

<sup>1</sup>H NMR (500 MHz, CD<sub>3</sub>OD) δ: 7.49 (br d, 1H, *J* = 8.0 Hz), 7.34 (ddd, 1H, *J* = 7.7, 7.7, 1.7 Hz), 7.28 (dd, 1H, *J* = 7.5, 1.7 Hz), 7.19 (ddd, 1H, *J* = 7.5, 7.5, 1.2 Hz) 1.41 (s, 9H). HRMS (ESI-TOF) *m/z* (M-H)<sup>-</sup> calcd. for 177.0910; Found 177.0910, Elem. Anal. Calcd for C<sub>11</sub>H<sub>14</sub>O<sub>2</sub>: C 74.13, H 7.92, Found: C 73.88, H 8.13. IR (KBr, cm<sup>-1</sup>): 2971 (OH, br), 1690 (CO, s), 1405 (s), 1302 (s), 1264 (s), 1074 (s), 924 (m), 760 (CH, CH-wag, m). Purity: 100% (HPLC area %).

### **3-*tert*-Butylbenzoic acid (7b)**

To a stirred solution of 3-bromo-*tert*-butylbenzene (426 mL, 2.50 mmol) in anhydrous THF (10 mL) at -78 °C was added dropwise *n*-BuLi (1.6 M, 3.20 mL, 5.00 mmol). After 15 min, an excess of dry ice was added. After 10 min, the mixture was allowed to warm to room temperature, and 1 M HCl (20 mL) was added. The whole was extracted with AcOEt (20 mL). The organic layer was washed with brine (20 mL), dried over Na<sub>2</sub>SO<sub>4</sub> and concentrated. The residue was purified by column chromatography (hexane/AcOEt) and recrystallization (EtOH/water) to afford **7b** as white crystals (253 mg, 57%).

<sup>1</sup>H NMR (500 MHz, CDCl<sub>3</sub>) δ: 8.16 (dd, 1H, *J* = 1.7, 1.7 Hz), 7.95 (dd, 1H, *J* = 1.7, 1.2 Hz), 7.93 (br s, 1H), 7.66 (br d, 1H, *J* = 8.0 Hz), 7.41 (dd, 1H, *J* = 8.0, 7.5 Hz), 1.36 (9H, s). HRMS (ESI-TOF) *m/z* (M-H)<sup>-</sup> calcd. for 177.0910; Found 177.0921 Elem. Anal. Calcd for C<sub>11</sub>H<sub>14</sub>O<sub>2</sub>: C 74.13, H 7.92, Found: C 74.05, H 7.87. IR (KBr, cm<sup>-1</sup>): 2967 (OH, br), 1684 (CO, s), 1300 (s), 1259 (s), 953 (m), 764 (CH, CH-wag, m). Purity: 100% 100% (HPLC area %).

### **4-*tert*-Butylbenzoic acid (7c)**

To a stirred solution of 4-bromo-*tert*-butylbenzene (426 mL, 2.50 mmol) in anhydrous THF (10 mL) at -78 °C was added dropwise *n*-BuLi (1.6 M, 3.20 mL, 5 mmol). After 15 min, an excess of dry ice was added. After 10 min, the mixture was allowed to warm to room temperature, and 1 M HCl (20 mL) was added. The whole was extracted with AcOEt (20 mL) twice. The combined organic layer was washed with brine (20 mL), dried over Na<sub>2</sub>SO<sub>4</sub> and concentrated. The residue was purified by column chromatography (hexane/AcOEt) and recrystallization (EtOH/water) to give **7c** (239 mg, 54%) as white plates.

$^1\text{H}$  NMR (500 MHz,  $\text{CDCl}_3$ )  $\delta$ : 8.04 (br d, 2H,  $J = 8.6$  Hz), 7.49 (br d, 2H,  $J = 8.6$  Hz), 1.35 (s, 9H). HRMS (ESI-TOF)  $m/z$  (M-H) $^-$  calcd. for 177.0910; Found 177.0912 Elem. Anal. Calcd for  $\text{C}_{11}\text{H}_{14}\text{O}_2$ : C 74.13, H 7.92, Found: C 74.04, H 7.88. IR (KBr,  $\text{cm}^{-1}$ ): 2964 (OH, br), 1686 (CO, s), 1610 (s), 1424 (s), 1318 (s), 1289 (s), 941 (m), 856 (CH, CH-wag, m). Purity: 100% (HPLC area %).

### Preparation of MAO inhibitors **8a-c**

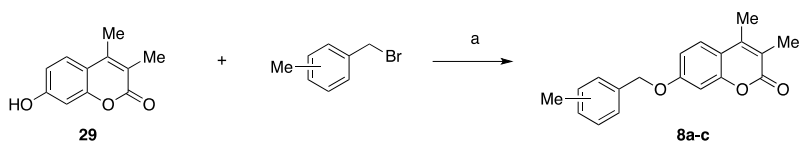

Scheme S1. Reagents and conditions: a)  $K_2CO_3$ , DMF, 100 °C.

### General procedure B (GP-B)

7-Hydroxy-3,4-dimethyl-2H-chromen-2-one (**29**)<sup>4</sup> (1.0 eq) was dissolved in dry DMF, and  $\alpha$ -bromoxylene (1.2 eq), and  $K_2CO_3$  (1.0 eq) were added. The suspension was refluxed at 100 °C for 12 h. After cooling to room temperature, the precipitate was removed by filtration. Water was added to the filtrate, and the mixture was extracted with AcOEt. The organic layer was washed with brine, dried over  $Na_2SO_4$ , and concentrated. The resulting mixture was purified by recrystallization (MeOH/water) to give the product.

### 3,4-Dimethyl-7-(2-methylbenzyloxy)-2H-chromen-2-one (**8a**)

This compound was prepared according to GP-B and purified by recrystallization (MeOH/water) to give **8a** as colorless needles (75%).

<sup>1</sup>H-NMR (DMSO-*d*<sub>6</sub>)  $\delta$ : 7.67 (d, 1H,  $J = 7.5$  Hz), 7.39 (d, 1H,  $J = 7.5$  Hz), 7.25-7.15 (m, 3H), 7.06 (d, 1H,  $J = 2.9$  Hz), 6.99 (dd, 1H,  $J = 9.2, 2.9$  Hz), 5.16 (s, 2H), 2.33 (s, 3H), 2.30 (s, 3H), 2.04 (s, 3H). HR-MS (ESI-TOF)  $m/z$  (M+H)<sup>+</sup> calcd. for 295.1329; Found 295.1353, Elem. Anal. Calcd for  $C_{19}H_{18}O_3$ : C 77.53, H 6.16, Found: C 77.32, H 6.24. Purity: 99.3% (HPLC area %).

### 3,4-Dimethyl-7-(3-methylbenzyloxy)-2H-chromen-2-one (**8b**)

This compound was prepared according to GP-B and purified by recrystallization (MeOH/water) to give **8b** as colorless needles (67%).

<sup>1</sup>H-NMR (DMSO-*d*<sub>6</sub>)  $\delta$ : 7.63 (d, 1H,  $J = 8.6$  Hz), 7.26-7.20 (m, 3H), 7.11 (d, 1H,  $J = 7.5$  Hz), 6.98-6.93 (m, 2H), 5.11 (s, 2H), 2.30 (s, 3H), 2.28 (s, 3H), 2.02 (s, 3H), HRMS (ESI-TOF)  $m/z$  (M+H)<sup>+</sup> calcd. for 295.1329; Found 295.1327, Elem. Anal. Calcd for  $C_{19}H_{18}O_3$ : C 77.53, H 6.16, Found: C 77.31, H 6.30. Purity: 99.2% (HPLC area %)

### 3,4-Dimethyl-7-(4-methylbenzyloxy)-2H-chromen-2-one (**8c**)

This compound was prepared according to GP-B and purified by recrystallization (MeOH/water) to give **8c** as

colorless needles (83%).

<sup>1</sup>H-NMR (DMSO-*d*<sub>6</sub>): δ: 7.64 (d, 1H, *J* = 9.2 Hz), 7.32 (d, 2H, *J* = 8.0 Hz), 7.17 (d, 2H, *J* = 7.5 Hz), 6.98 (d, 1H, *J* = 2.9 Hz), 6.95 (dd, 1H, *J* = 9.2, 2.9 Hz), 5.11 (d, 2H), 2.31 (d, 3H), 2.67 (s, 3H), 2.03 (s, 3H), HRMS (ESI-TOF) *m/z* (M+H)<sup>+</sup> calcd. for 295.1329; Found 295.1323, Elem. Anal. Calcd for C<sub>19</sub>H<sub>18</sub>O<sub>3</sub>: C 77.53, H 6.16, Found: C 77.43, H 6.33. Purity: 99.8% (HPLC area %).

### Preparation of p38 MAP kinase inhibitors 9a-c

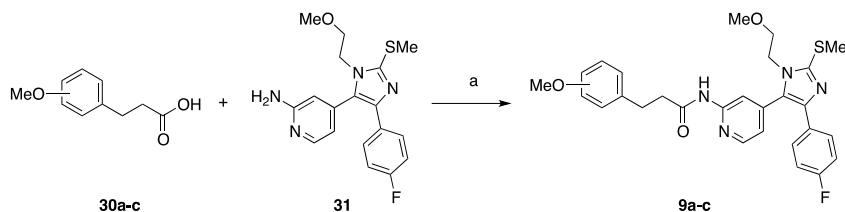

Scheme S2. Reagents and conditions: a) EDCI, DMAP, THF, reflux.

### General procedure C (GP-C)

Under an argon atmosphere, a mixture of 4-[5-(4-fluorophenyl)-3-(2-methoxyethyl)-2-methylsulfanyl-3H-imidazol-4-yl]pyridin-2-ylamine (**31**) (1.0 eq), (methoxyphenyl)propionic acid (3.0 eq), DMAP (3.0 eq) and EDCI (3.0 eq) in dry THF was stirred under reflux until the reaction was completed. The solvent was removed in vacuo, and AcOEt was added to the residue. The organic layer was washed with H<sub>2</sub>O, dried over Na<sub>2</sub>SO<sub>4</sub> and concentrated in vacuo. The crude product was purified by flash chromatography (CHCl<sub>3</sub>: MeOH) and recrystallization (EtOH: H<sub>2</sub>O).

### *N*-{4-[5-(4-Fluorophenyl)-3-(2-methoxyethyl)-2-methylsulfanyl-3H-imidazol-4-yl]pyridin-2-yl}-3-(2-methoxyphenyl)propionamide (**9a**)

This compound was prepared according to GP-C and purified by recrystallization (EtOH: H<sub>2</sub>O) to give a white solid (52%).

<sup>1</sup>H-NMR (CDCl<sub>3</sub>) δ: 8.50 (br s, 1H), 8.30 (s, 1H), 8.22 (d, 1H, *J* = 5.2 Hz), 7.39 (br dd, 2H, *J* = 8.6, 5.4 Hz), 7.20 (ddd, 1H, *J* = 8.0, 8.0, 1.7 Hz), 7.16 (d, 1H, *J* = 7.5 Hz), 6.93-6.84 (m, 5H), 4.09 (t, 2H, *J* = 6.0 Hz), 3.82 (s, 3H), 3.48 (t, 2H, *J* = 6.0 Hz), 3.22 (s, 3H), 3.03 (t, 2H, *J* = 7.5 Hz), 2.71 (s, 3H), 2.69 (t, 2H, *J* = 7.5 Hz). HRMS (ESI-TOF) *m/z* (M+H)<sup>+</sup> calcd. for 521.2017; Found 521.2037. Purity: 99.7% (HPLC area %).

### *N*-{4-[5-(4-Fluorophenyl)-3-(2-methoxyethyl)-2-methylsulfanyl-3H-imidazol-4-yl]pyridin-2-yl}-3-(3-

**methoxyphenyl)propionamide (9b)**

This compound was prepared according to GP-C and purified by recrystallization (EtOH: H<sub>2</sub>O) to give a white solid (62%).

<sup>1</sup>H-NMR (CDCl<sub>3</sub>) δ: 8.78 (s, 1H) 8.30 (s, 1H), 8.20 (d, 1H, *J* = 5.2 Hz), 7.39 (br dd, 2H, *J* = 9.2, 5.7 Hz), 7.18 (dd, 1H, *J* = 7.7, 7.7 Hz), 6.93 (dd, 1H, *J* = 5.2, 1.7 Hz), 6.89 (dd, 2H, *J* = 8.9, 8.9 Hz), 6.78 (d, 1H, *J* = 7.5 Hz), 6.76-6.72 (m, 2H). 4.08 (t, 2H, *J* = 6.0 Hz), 3.75 (s, 3H), 3.49 (t, 2H, *J* = 5.7 Hz), 3.21 (s, 3H), 3.00 (t, 2H, *J* = 7.7 Hz), 2.73-2.68 (m, 5H). HRMS (ESI-TOF) *m/z* (M+H)<sup>+</sup> calcd. for 521.2017; Found 521.2012, 99.6% (HPLC area %).

***N*-{4-[5-(4-Fluorophenyl)-3-(2-methoxyethyl)-2-methylsulfanyl-3*H*-imidazol-4-yl]-pyridin-2-yl}-3-(4-methoxyphenyl)-propionamide (9c)**

This compound was prepared according to GP-C and purified by recrystallization (EtOH: H<sub>2</sub>O) to give a white solid (65%).

<sup>1</sup>H NMR (CDCl<sub>3</sub>) δ: 8.63 (br s, 1H), 8.29 (s, 1H), 8.21 (d, 1H, *J* = 5.2 Hz), 7.40 (br dd, 2H, *J* = 9.2, 5.8 Hz), 7.11 (d, 2H, *J* = 8.6 Hz), 6.93 (dd, 1H, *J* = 5.2, 1.7 Hz), 6.90 (dd, 1H, *J* = 8.9, 8.9 Hz), 6.81 (br d, 1H, *J* = 8.6 Hz), 4.08 (t, 2H, *J* = 6.0 Hz), 3.76 (s, 3H), 3.49 (t, 2H, *J* = 6.0 Hz), 3.22 (s, 3H), 2.97 (t, 2H, *J* = 7.4 Hz), 2.71 (s, 3H), 2.67 (t, 2H, *J* = 7.7 Hz), HRMS (ESI-TOF) *m/z* (M+H)<sup>+</sup> calcd. for 521.2017; Found 521.2036, 99.9% (HPLC area %).

**(R)-1-(2-Methylacryloyl)pyrrolidine-2-carboxylic acid (18)**

A solution of methacryloyl chloride (2.32 g, 22.1 mmol) in acetone (12 mL) was added dropwise to a solution of D-proline (**17**) (2.50 g, 21.7 mmol) in 2 M NaOHaq (12 mL) at 0 °C. During the addition, the pH was monitored and kept within the range of 10.3±0.3 via simultaneous addition of 2 M NaOHaq. After the addition, the reaction mixture was allowed to warm to room temperature and then stirred for 3 h. After evaporation of the acetone, the aqueous phase was acidified to pH 2 with 1 M HCl, and NaCl was added till saturation. The resulting solution was extracted with AcOEt, and the combined organic extract was dried over Na<sub>2</sub>SO<sub>4</sub> and concentrated. Purification of the residue by silica gel column chromatography (CHCl<sub>3</sub>/MeOH=10/3) afforded **18** as a white solid (2.91 g, 73.1%).

<sup>1</sup>H NMR (500 MHz, CDCl<sub>3</sub>) δ 5.39 (s, 1H), 5.27 (s, 1H), 4.65-4.56 (m, 1H), 3.65-3.58 (m, 2H), 2.48-2.44 (m, 1H), 2.20-2.08 (m, 1H), 2.06-2.01 (m, 2H), 1.96-1.86 (m, 1H), 1.99 (s, 3H). FAB-MS *m/z* 184 (M+H)<sup>+</sup>.

**(3R,8aR)-3-(Bromomethyl)-3-methyltetrahydro-1H-pyrrolo[2,1-c][1,4]oxazine-1,4(3H)-dione (19)**

To a solution of **18** (3.19 g, 17.4 mmol) in CCl<sub>4</sub> (9 mL) and dry DMF (11.3 mL), a solution of NBS (4.02 g, 22.6 mmol) in dry DMF (14.2 mL) was added dropwise in a light-shielded environment at 0 °C. After the addition, the reaction mixture was stirred at 0 °C for 2 h, allowed to warm to room temperature, and then stirred for an additional 23 h. After the evaporation of CCl<sub>4</sub>, brine was added, and the mixture was extracted with AcOEt. The combined organic extract was dried over Na<sub>2</sub>SO<sub>4</sub> and concentrated. Purification of the residue by silica gel column chromatography (hexane/AcOEt=1/2) afforded **19** as a white solid (3.91 g, 86%).

<sup>1</sup>H NMR (500 MHz, CDCl<sub>3</sub>) δ 4.56-4.51 (m, 1H), 3.88 (d, 1H, *J* = 11.4 Hz), 3.75-3.70 (m, 1H), 3.65-3.57 (m, 2H), 2.54-2.47 (m, 1H), 2.15-2.02 (m, 2H), 2.00-1.92 (m, 1H), 1.74 (s, 3H). FAB-MS *m/z* 262 (M+H)<sup>+</sup>.

**(R)-3-Bromo-2-hydroxy-2-methylpropanoic acid (20)**

A solution of **19** (1.00 g, 3.82 mmol) in 24% aqueous HBr (17 mL) was heated to 100 °C for 90 min, then cooled to room temperature, and NaCl was added till saturation. The mixture was extracted with AcOEt. The organic phase was extracted with saturated NaHCO<sub>3</sub> aqueous solution, and the resulting aqueous phase was acidified to pH 1, and extracted with AcOEt. The combined organic extract was dried over Na<sub>2</sub>SO<sub>4</sub> and concentrated. Purification of the residue by silica gel column chromatography (hexane/AcOEt=1/1) afforded **20** as a white solid (515 mg, 74%).

<sup>1</sup>H NMR (500 MHz, DMSO-*d*<sub>6</sub>) δ 3.68 (d, 1H, *J* = 10.3 Hz), 3.58 (d, 1H, *J* = 10.3 Hz), 1.41 (s, 3H). FAB-MS

$m/z$  154 (M+H)<sup>+</sup>.

**(R)-3-Bromo-N-[4-cyano-3-(trifluoromethyl)phenyl]-2-hydroxy-2-methylpropanamide (21)**

Thionyl chloride (0.471 mL, 6.49 mmol) was added to a stirred solution of **20** (500 mg, 2.73 mmol) in CH<sub>3</sub>CN (10 mL) at 5 °C. Stirring was continued for 2 h at the same temperature, and then triethylamine (0.691 mL, 4.96 mmol) was added slowly. A solution of 4-amino-(2-trifluoromethyl)benzotrile (615 mg, 3.30 mmol) in CH<sub>3</sub>CN was added to the reaction mixture at 5 °C. Stirring was continued at the same temperature for 3 h and then at room temperature for an additional 20 h. The reaction mixture was diluted with AcOEt and washed with NaHCO<sub>3</sub> aqueous solution and brine. The combined organic phase was dried over Na<sub>2</sub>SO<sub>4</sub> and concentrated. Purification of the residue by silica gel column chromatography (CH<sub>2</sub>Cl<sub>2</sub>) afforded **21** as a white solid (702 mg, 73%).

<sup>1</sup>H NMR (500 MHz, CDCl<sub>3</sub>) δ 8.09 (d, 1H,  $J$  = 2.3 Hz), 7.96 (dd, 1H,  $J$  = 8.6, 2.3 Hz), 7.82 (d, 1H,  $J$  = 8.6 Hz), 4.03 (d, 1H,  $J$  = 10.6 Hz), 3.60 (d, 1H,  $J$  = 10.6 Hz), 1.64 (s, 3H). FAB-MS  $m/z$  352 (M+H)<sup>+</sup>.

**General procedure A (GP-A)**

A solution of **21** (1.0 eq) in dry THF was added to a suspension of the sodium salt of thiophenol (prepared from a 60% sodium hydride dispersion in oil and thiophenol in dry THF, 1.3 eq). The mixture was stirred for 20 h, then water was added carefully, and the whole was extracted with AcOEt. The combined AcOEt extract was dried over Na<sub>2</sub>SO<sub>4</sub> and concentrated to yield a sulfide **22-28** as a brown oil.

To a solution of sulfide **22-28** in dry CH<sub>2</sub>Cl<sub>2</sub> was added 70% *m*CPBA (2.6 eq). The reaction mixture was stirred overnight at room temperature, then diluted with Na<sub>2</sub>S<sub>2</sub>O<sub>3</sub> aqueous solution, and extracted with AcOEt. The combined organic layer was washed with NaHCO<sub>3</sub> aqueous solution, dried over Na<sub>2</sub>SO<sub>4</sub>, and concentrated in reduced pressure. Purification of the residue by silica gel column chromatography (AcOEt/hexane=1/1) afforded the target compound as a white solid.

**(R)-N-(4-Cyano-3-(trifluoromethyl)phenyl)-2-hydroxy-2-methyl-3-(*o*-tolylsulfonyl)propanamide (10a)**

This compound was prepared from compound **21** (100 mg, 0.285 mmol), 2-methylthiophenol (44.6 μL, 0.379 mmol), 60% NaH (15.0 mg, 0.625 mmol), THF (3.5 mL), 70% *m*CPBA (181 mg, 0.735 mmol) and CH<sub>2</sub>Cl<sub>2</sub> (3.5 mL) according to GP-A, and purified by recrystallization using a vapor diffusion method (AcOEt/hexane) to give a white solid (16.2 mg, 13%).

<sup>1</sup>H NMR (500 MHz, CDCl<sub>3</sub>) δ 9.01 (s, 1H), 7.87-7.84 (m, 2H), 7.75 (d, 1H, *J* = 8.6 Hz), 7.64 (dd, 1H, *J* = 8.6, 2.3 Hz), 7.42 (ddd, 1H, *J* = 7.4, 7.4, 1.2 Hz), 7.34 (d, 1H, *J* = 7.5 Hz), 7.12 (dd, 1H, *J* = 7.4, 7.4 Hz), 5.31 (s, 1H), 4.07 (d, 1H, *J* = 14.3 Hz), 3.44 (d, 1H, *J* = 14.3 Hz), 2.72 (s, 3H), 1.59 (s, 3H). <sup>13</sup>C NMR (125 MHz, CDCl<sub>3</sub>) δ 171.4, 141.0, 138.9, 136.8, 135.7, 134.6, 134.0 (q, *J* = 32.2 Hz), 133.2, 129.5, 126.5, 122.1 (q, *J* = 271.8 Hz), 121.9, 117.4 (q, *J* = 4.8 Hz), 115.5, 105.0, 74.3, 60.0, 28.0, 20.3. FAB-MS *m/z* 427 (M+H)<sup>+</sup>. Anal. Calcd for C<sub>19</sub>H<sub>17</sub>F<sub>3</sub>N<sub>2</sub>O<sub>4</sub>S: C, 53.52; H, 4.02; N, 6.57. Found: C, 53.24; H, 4.12; N, 6.69. Purity: 99.3% (HPLC area %).

**(*R*)-*N*-(4-Cyano-3-(trifluoromethyl)phenyl)-2-hydroxy-2-methyl-3-(*m*-tolylsulfonyl)propanamide (10b)**

This compound was prepared from compound **21** (100 mg, 0.285 mmol), 3-methylthiophenol (45.1 μL, 0.379 mmol), 60% NaH (15.0 mg, 0.625 mmol), THF (3.5 mL), 70% *m*CPBA (181 mg, 0.735 mmol) and CH<sub>2</sub>Cl<sub>2</sub> (3.5 mL) according to GP-A, and purified by recrystallization using a vapor diffusion method (AcOEt/hexane) to give a white solid (30.9 mg, 25%).

<sup>1</sup>H NMR (500 MHz, CDCl<sub>3</sub>) δ 9.10 (s, 1H), 7.97 (d, 1H, *J* = 2.3 Hz), 7.79 (d, 1H, *J* = 8.0 Hz), 7.74 (dd, 1H, *J* = 8.6, 2.3 Hz), 7.68-7.64 (m, 2H), 7.43 (br d, 1H, 7.5 Hz), 7.38 (dd, 2H, 7.7 Hz), 5.25 (br s, 1H), 3.98 (d, 1H, *J* = 14.3 Hz), 3.47 (d, 1H, *J* = 14.3 Hz), 2.32 (s, 3H), 1.59 (s, 3H). <sup>13</sup>C NMR (125 MHz, CDCl<sub>3</sub>) δ 171.5, 141.1, 134.0, 138.7, 135.7, 135.4, 134.0 (q, *J* = 32.8 Hz), 129.4, 128.1, 125.0, 122.1 (q, *J* = 273.9 Hz), 121.8, 117.3 (q, *J* = 4.8 Hz), 115.4, 104.9, 74.3, 61.2, 27.8, 21.2. FAB-MS *m/z* 427 (M+H)<sup>+</sup>. Anal. Calcd for C<sub>19</sub>H<sub>17</sub>F<sub>3</sub>N<sub>2</sub>O<sub>4</sub>S: C, 53.52; H, 4.02; N, 6.57. Found: C, 53.41; H, 4.07; N, 6.54. Purity: 99.5% (HPLC area %).

**(*R*)-*N*-(4-Cyano-3-(trifluoromethyl)phenyl)-2-hydroxy-2-methyl-3-tosylpropanamide (10c)**

This compound was prepared from compound **21** (100 mg, 0.285 mmol), 4-methylthiophenol (44.8 μL, 0.379 mmol), 60% NaH (15.0 mg, 0.625 mmol), THF (3.5 mL), 70% *m*CPBA (181 mg, 0.735 mmol) and CH<sub>2</sub>Cl<sub>2</sub> (3.5 mL) according to GP-A, and purified by recrystallization using a vapor diffusion method (AcOEt/hexane) to give a white solid (29.8 mg, 25%).

<sup>1</sup>H NMR (500 MHz, CDCl<sub>3</sub>) δ 9.07 (s, 1H), 7.96 (d, 1H, *J* = 2.3 Hz), 7.78 (d, 1H, *J* = 8.6 Hz), 7.74-7.70 (m, 3H), 7.27-7.24 (m, 2H), 5.25 (s, 1H), 3.96 (d, 1H, *J* = 14.3 Hz), 3.45 (d, 1H, *J* = 14.3 Hz), 2.37 (s, 3H), 1.58 (s, 3H). <sup>13</sup>C NMR (125 MHz, CDCl<sub>3</sub>) δ 171.6, 146.0, 141.2, 135.9, 135.8, 135.7, 134.1 (q, *J* = 32.2 Hz), 130.1, 128.0, 122.1 (q, *J* = 271.8 Hz), 121.9, 117.4 (q, *J* = 4.8 Hz), 115.4, 105.0, 74.4, 61.3, 27.9, 21.7. FAB-MS *m/z* 427 (M+H)<sup>+</sup>. HRMS (ESI-TOF) *m/z* (M-H)<sup>-</sup> calcd. for 425.0794; Found 425.0777. Purity: 99.2% (HPLC area



%).

**(R)-N-(4-Cyano-3-(trifluoromethyl)phenyl)-3-((2-ethylphenyl)sulfonyl)-2-hydroxy-2-methylpropanamide (11a)**

This compound was prepared according to GP-A, and purified by recrystallization (2-butanone/hexane) to give colorless needles (68%).

<sup>1</sup>H NMR (500 MHz, CDCl<sub>3</sub>) δ 9.02 (s, 1H), 7.88 (d, 1H, *J* = 1.7 Hz), 7.85 (dd, 1H, *J* = 8.0, 1.2 Hz), 7.76 (d, 1H, *J* = 8.6 Hz), 7.66 (dd, 1H, *J* = 8.6, 2.3 Hz), 7.49 (ddd, 1H, *J* = 7.4, 7.4, 1.2 Hz), 7.41 (d, 1H, *J* = 8.0 Hz), 7.14 (br dd, 1H, *J* = 7.4 Hz), 5.31 (s, 1H), 4.05 (d, 1H, *J* = 14.3 Hz), 3.48 (d, 1H, *J* = 14.3 Hz), 3.13-2.98 (m, 2H), 1.59 (s, 3H), 1.35 (t, 3H, *J* = 7.4 Hz). <sup>13</sup>C NMR (125 MHz, CDCl<sub>3</sub>) δ 171.5, 145.0, 141.1, 136.5, 135.8, 134.7, 134.0 (q, *J* = 32.2 Hz), 131.4, 129.6, 126.4, 122.1 (q, *J* = 273.0 Hz), 121.9, 117.5 (q, *J* = 4.8 Hz), 115.5, 105.0, 74.4, 61.0, 27.9, 26.1, 15.7. HRMS (ESI-TOF) *m/z* (M-H)<sup>-</sup> calcd. for 439.0934; Found 439.0960. Purity: 99.3% (HPLC area %).

**(R)-N-(4-Cyano-3-(trifluoromethyl)phenyl)-3-((3-ethylphenyl)sulfonyl)-2-hydroxy-2-methylpropanamide (11b)**

This compound was prepared according to GP-A, and purified by recrystallization (*i*-Pr<sub>2</sub>O/hexane) to give colorless needles (76%).

<sup>1</sup>H NMR (500 MHz, CDCl<sub>3</sub>) δ 9.12 (s, 1H), 8.01 (d, 1H, *J* = 1.7 Hz), 7.80-7.74 (m, 2H), 7.70-7.66 (m, 2H), 7.46 (br d, 1H, *J* = 8.0 Hz), 7.40 (dd, 1H, *J* = 8.0 Hz), 5.25 (br s, 1H), 3.99 (d, 1H, *J* = 14.3 Hz), 3.48 (d, 1H, *J* = 14.3 Hz), 2.67-2.59 (m, 2H), 1.26 (s, 3H), 1.21 (t, 3H, *J* = 7.4 Hz). <sup>13</sup>C NMR (125 MHz, CDCl<sub>3</sub>) δ 171.7, 146.3, 138.9, 135.8, 134.3, 134.0 (q, *J* = 33.4 Hz), 129.5, 127.1, 125.3, 122.2 (q, *J* = 273.0 Hz), 122.0, 117.5 (q, *J* = 4.8 Hz), 115.5, 104.9, 76.9, 61.5, 28.6, 27.9, 15.2. HRMS (ESI-TOF) *m/z* (M-H)<sup>-</sup> calcd. for 439.0934; Found 439.0936. Purity: 99.8% (HPLC area %).

**(R)-N-(4-Cyano-3-(trifluoromethyl)phenyl)-3-((4-ethylphenyl)sulfonyl)-2-hydroxy-2-methylpropanamide (11c)**

This compound was prepared according to GP-A, and purified by recrystallization (AcOEt/hexane) to give faint pink needles (72%)

<sup>1</sup>H NMR (500 MHz, CDCl<sub>3</sub>) δ 9.07 (s, 1H), 7.96 (d, 1H, *J* = 1.7 Hz), 7.77-7.72 (m, 4H), 7.31 (d, 2H, *J* = 8.6

Hz), 5.25 (s, 1H), 3.94 (d, 1H,  $J = 14.6$  Hz), 3.44 (d, 1H,  $J = 14.6$  Hz), 2.67 (dq, 2H,  $J = 7.7, 2.3$  Hz), 1.58 (s, 3H), 1.19 (t, 3H,  $J = 7.7$  Hz).  $^{13}\text{C}$  NMR (125 MHz,  $\text{CDCl}_3$ )  $\delta$  171.6, 152.1, 141.2, 136.1, 135.8, 134.1 (q,  $J = 32.2$  Hz), 129.0, 128.1, 122.1 (q,  $J = 271.9$  Hz), 117.4 (q,  $J = 4.8$  Hz), 105.0, 74.4, 61.3, 28.9, 27.9, 15.0. HRMS (ESI-TOF)  $m/z$  (M-H) $^-$  calcd. for 439.0934; Found 439.0957. Purity: 99.5% (HPLC area %).

**(R)-N-(4-Cyano-3-(trifluoromethyl)phenyl)-3-((2-fluorophenyl)sulfonyl)-2-hydroxy-2-methylpropanamide (12a)**

This compound was prepared from compound **21** (100 mg, 0.285 mmol), 2-fluorothiophenol (40.4  $\mu\text{L}$ , 0.379 mmol), 60% NaH (15.0 mg, 0.625 mmol), THF (3.5 mL), 70% *m*CPBA (180 mg, 0.728 mmol) and  $\text{CH}_2\text{Cl}_2$  (3.5 mL) according to GP-A, and purified by recrystallization using a vapor diffusion method (AcOEt/hexane) to give a white solid (21.7 mg, 18%).

$^1\text{H}$  NMR (500 MHz,  $\text{CDCl}_3$ )  $\delta$  9.03 (s, 1H), 7.88 (d, 1H,  $J = 2.3$  Hz), 7.79-7.76 (m, 2H), 7.66 (dd, 1H  $J = 8.6, 1.7$  Hz), 7.64-7.60 (m, 1H), 7.30-7.28 (m, 1H), 7.13 (ddd, 1H,  $J = 7.7, 7.7, 1.2$  Hz), 5.09 (s, 1H), 4.23 (d, 1H,  $J = 14.9$  Hz), 3.63 (d, 1H,  $J = 14.9$  Hz), 1.62 (s, 3H).  $^{13}\text{C}$  NMR (125 MHz,  $\text{CDCl}_3$ )  $\delta$  171.2, 159.9 (d,  $J = 256.7$  Hz), 140.9, 137.1 (d,  $J = 8.4$  Hz), 135.7, 134.0 (q,  $J = 32.8$  Hz), 129.6, 126.9 (d,  $J = 14.4$  Hz), 124.6 (d,  $J = 3.6$  Hz), 122.0 (q,  $J = 274.3$  Hz), 121.8, 117.6 (d,  $J = 21.6$  Hz), 117.3 (q,  $J = 5.2$  Hz), 115.3, 105.0, 74.3, 60.8, 27.6. FAB-MS  $m/z$  431 (M+H) $^+$ . Anal. Calcd for  $\text{C}_{18}\text{H}_{14}\text{F}_4\text{N}_2\text{O}_4\text{S}$ : C, 50.23; H, 3.28; N, 6.51. Found: C, 50.14; H, 3.34; N, 6.53. Purity: 98.8% (HPLC area %).

**(R)-N-(4-Cyano-3-(trifluoromethyl)phenyl)-3-((3-fluorophenyl)sulfonyl)-2-hydroxy-2-methylpropanamide (12b)**

This compound was prepared from compound **21** (92.0 mg, 0.262 mmol), 3-fluorothiophenol (37.1  $\mu\text{L}$ , 0.349 mmol), 60% NaH (13.8 mg, 0.575 mmol), THF (3.5 mL), 70% *m*CPBA (126 mg, 0.511 mmol) and  $\text{CH}_2\text{Cl}_2$  (3.5 mL) according to GP-A, and purified by recrystallization using a vapor diffusion method (AcOEt/hexane) to give a white solid (13.2 mg, 16%).

$^1\text{H}$  NMR (500 MHz,  $\text{CDCl}_3$ )  $\delta$  9.08 (s, 1H), 7.98 (d, 1H,  $J = 1.7$  Hz), 7.82-7.78 (m, 2H), 7.68 (br d, 1H,  $J = 8.6$  Hz), 7.56 (ddd, 1H,  $J = 9.7, 2.3, 2.3$  Hz), 7.52 (ddd, 1H,  $J = 8.0, 8.0, 5.2$  Hz), 7.35 (br ddd, 1H,  $J = 8.0, 8.0, 3.4$  Hz), 5.01 (s, 1H), 3.99 (d, 1H,  $J = 14.3$  Hz), 3.52 (d, 1H,  $J = 14.3$  Hz), 1.63 (s, 3H).  $^{13}\text{C}$  NMR (125 MHz,  $\text{CDCl}_3$ )  $\delta$  171.3, 162.5 (d,  $J = 253.0$  Hz), 141.0, 141.0, 135.9, 134.2 (q,  $J = 33.6$  Hz), 131.6 (d,  $J = 7.2$  Hz), 123.8 (d,  $J = 3.6$  Hz), 122.1 (q,  $J = 273.8$  Hz), 122.1, 121.9, 117.4 (q,  $J = 4.8$  Hz), 115.4 (d,  $J = 12.6$  Hz),

115.4, 105.3, 74.5, 61.5, 27.8. FAB-MS  $m/z$  431 (M+H)<sup>+</sup>. Anal. Calcd for C<sub>18</sub>H<sub>14</sub>F<sub>4</sub>N<sub>2</sub>O<sub>4</sub>S: C, 50.23; H, 3.28; N, 6.51. Found: C, 50.09; H, 3.28; N, 6.51. Purity: 98.9% (HPLC area %).

**(R)-N-(4-Cyano-3-(trifluoromethyl)phenyl)-3-((4-fluorophenyl)sulfonyl)-2-hydroxy-2-methylpropanamide (12c)**

This compound was prepared from compound **21** (92.0 mg, 0.262 mmol), 4-fluorothiophenol (37.1  $\mu$ L, 0.349 mmol), 60% NaH (13.8 mg, 0.575 mmol), THF (3.5 mL), 70% *m*CPBA (208 mg, 0.847 mmol) and CH<sub>2</sub>Cl<sub>2</sub> (3.5 mL) according to GP-A, and purified by recrystallization using a vapor diffusion method (AcOEt/hexane) to give a white solid (18.0 mg, 16%).

<sup>1</sup>H NMR (500 MHz, CDCl<sub>3</sub>)  $\delta$  9.08 (s, 1H), 7.98 (d, 1H,  $J$  = 1.7 Hz), 7.90 (ddd, 2H,  $J$  = 9.2, 5.2, 2.3 Hz) 7.81-7.77 (m, 2H), 7.18 (br dd, 2H,  $J$  = 9.2, 8.0 Hz), 5.05 (s, 1H), 3.97 (d, 1H,  $J$  = 14.3 Hz), 3.50 (d, 1H,  $J$  = 14.3 Hz), 1.62 (s, 3H). <sup>13</sup>C NMR (125 MHz, CDCl<sub>3</sub>)  $\delta$  171.4, 166.3 (d,  $J$  = 259.1 Hz), 141.0, 135.8, 135.0, 134.1 (q,  $J$  = 33.2 Hz), 130.9 (d,  $J$  = 9.6 Hz), 122.0 (q,  $J$  = 274.3 Hz), 121.8, 117.3 (q,  $J$  = 6.0 Hz), 116.9 (d,  $J$  = 22.8 Hz), 115.3, 105.1, 74.5, 61.5, 27.7. FAB-MS  $m/z$  431 (M+H)<sup>+</sup>. Anal. Calcd for C<sub>18</sub>H<sub>14</sub>F<sub>4</sub>N<sub>2</sub>O<sub>4</sub>S: C, 50.23; H, 3.28; N, 6.51. Found: C, 50.23; H, 3.36; N, 6.44. Purity: 99.6% (HPLC area %).

**(R)-3-((2-Chlorophenyl)sulfonyl)-N-(4-cyano-3-(trifluoromethyl)phenyl)-2-hydroxy-2-methylpropanamide (13a)**

This compound was prepared from compound **21** (100 mg, 0.285 mmol), 2-chlorothiophenol (43.2  $\mu$ L, 0.380 mmol), 60% NaH (15.0 mg, 0.624 mmol), THF (3.5 mL), 70% *m*CPBA (211 mg, 0.856 mmol) and CH<sub>2</sub>Cl<sub>2</sub> (3.5 mL) according to GP-A, and purified by recrystallization using a vapor diffusion method (AcOEt/hexane) to give a white solid (56.9 mg, 45%).

<sup>1</sup>H NMR (500 MHz, CDCl<sub>3</sub>)  $\delta$  9.03 (s, 1H), 7.95 (dd, 1H,  $J$  = 8.0, 1.8 Hz), 7.88 (d, 1H,  $J$  = 1.8 Hz), 7.77 (d, 1H,  $J$  = 8.0 Hz), 7.67 (dd, 1H,  $J$  = 8.0, 1.5 Hz), 7.60 (dd, 1H,  $J$  = 8.0, 1.5 Hz), 7.54 (ddd, 1H,  $J$  = 8.0, 7.5, 1.7 Hz), 7.29-7.25 (m, 1H), 5.15 (s, 1H), 4.40 (d, 1H,  $J$  = 14.6 Hz), 3.67 (d, 1H,  $J$  = 14.6 Hz), 1.62 (s, 3H). <sup>13</sup>C NMR (125 MHz, CDCl<sub>3</sub>)  $\delta$  171.4, 141.1, 136.6, 135.8, 135.6, 134.0 (q,  $J$  = 32.2 Hz), 133.4, 132.3, 130.9, 127.3, 122.1 (q,  $J$  = 271.8 Hz), 121.9, 117.4 (q,  $J$  = 4.8 Hz), 115.5, 105.0, 74.50, 59.7, 27.7. FAB-MS  $m/z$  447 (M+H)<sup>+</sup>. Anal. Calcd for C<sub>18</sub>H<sub>14</sub>ClF<sub>3</sub>N<sub>2</sub>O<sub>4</sub>S: C, 48.39; H, 3.16; N, 6.27. Found: C, 48.38; H, 3.26; N, 6.32. Purity: 98.2% (HPLC area %).

**(R)-3-((3-Chlorophenyl)sulfonyl)-N-(4-cyano-3-(trifluoromethyl)phenyl)-2-hydroxy-2-methylpropanamide (13b)**

This compound was prepared from compound **21** (100 mg, 0.285 mmol), 3-chlorothiophenol (43.2  $\mu$ L, 0.380 mmol), 60% NaH (15.0 mg, 0.624 mmol), THF (3.5 mL), 70% *m*CPBA (211 mg, 0.856 mmol) and CH<sub>2</sub>Cl<sub>2</sub> (3.5 mL) according to GP-A, and purified by recrystallization using a vapor diffusion method (AcOEt/hexane) to give a white solid (92.8 mg, 73%).

<sup>1</sup>H NMR (500 MHz, CDCl<sub>3</sub>)  $\delta$  9.07 (s, 1H), 7.97 (d, 1H, *J* = 1.7 Hz), 7.82 (dd, 1H, *J* = 1.7, 1.7 Hz), 7.79-7.75 (m, 3H), 7.60-7.58 (m, 1H), 7.48 (dd, 1H, *J* = 8.0, 8.0 Hz), 5.02 (s, 1H), 4.01 (d, 1H, *J* = 14.6 Hz), 3.49 (d, 1H, *J* = 14.6 Hz), 1.62 (s, 3H). <sup>13</sup>C NMR (125 MHz, CDCl<sub>3</sub>)  $\delta$  171.3, 140.9, 140.6, 135.9, 135.9, 134.8, 134.2 (q, *J* = 33.4 Hz), 131.0, 128.1, 126.2, 122.1 (q, *J* = 271.8 Hz), 121.9, 117.4 (q, *J* = 4.8 Hz), 115.4, 105.0, 74.5, 61.5, 27.9. FAB-MS *m/z* 447 (M+H)<sup>+</sup>. Anal. Calcd for C<sub>18</sub>H<sub>14</sub>ClF<sub>3</sub>N<sub>2</sub>O<sub>4</sub>S: C, 48.39; H, 3.16; N, 6.27. Found: C, 48.28; H, 3.32; N, 6.26. Purity: 99.4% (HPLC area %).

**(R)-3-((4-Chlorophenyl)sulfonyl)-N-(4-cyano-3-(trifluoromethyl)phenyl)-2-hydroxy-2-methylpropanamide (13c)**

This compound was prepared from compound **21** (100 mg, 0.285 mmol), 4-chlorothiophenol (43.2  $\mu$ L, 0.380 mmol), 60% NaH (15.0 mg, 0.624 mmol), THF (3.5 mL), 70% *m*CPBA (211 mg, 0.856 mmol) and CH<sub>2</sub>Cl<sub>2</sub> (3.5 mL) according to GP-A, and purified by recrystallization using a vapor diffusion method (AcOEt/hexane) to give a white solid (95.5 mg, 75%).

<sup>1</sup>H NMR (500 MHz, CDCl<sub>3</sub>)  $\delta$  9.04 (s, 1H), 7.96 (d, 1H, *J* = 2.3 Hz), 7.82-7.79 (m, 3H), 7.77 (dd, 1H, *J* = 8.6, 2.0 Hz), 7.46 (br d, 2H, *J* = 8.6 Hz), 5.01 (s, 1H), 7.47-7.45 (m, 2H), 3.98 (d, 1H, *J* = 14.3 Hz), 3.49 (d, 1H, *J* = 14.3 Hz), 1.61 (s, 3H). <sup>13</sup>C NMR (125 MHz, CDCl<sub>3</sub>)  $\delta$  171.3, 141.6, 140.9, 137.2, 135.8, 134.2 (q, *J* = 32.8 Hz), 129.8, 129.4, 122.0 (q, *J* = 274.3 Hz), 121.8, 117.2 (q, *J* = 4.8 Hz), 115.3, 105.1, 74.4, 61.4, 27.8. FAB-MS *m/z* 447 (M+H)<sup>+</sup>. Anal. Calcd for C<sub>18</sub>H<sub>14</sub>ClF<sub>3</sub>N<sub>2</sub>O<sub>4</sub>S: C, 48.39; H, 3.16; N, 6.27. Found: C, 48.39; H, 3.34; N, 6.31. Purity: 98.9% (HPLC area %).

**(R)-3-((2-Bromophenyl)sulfonyl)-N-(4-cyano-3-(trifluoromethyl)phenyl)-2-hydroxy-2-methylpropanamide (14a)**

This compound was prepared from compound **21** (143 mg, 0.407 mmol), 2-bromothiophenol (65.3  $\mu$ L, 0.543 mmol), 60% NaH (21.4 mg, 0.892 mmol), THF (3.5 mL), 70% *m*CPBA (301 mg, 1.22 mmol) and CH<sub>2</sub>Cl<sub>2</sub>

(3.5 mL) according to GP-A, and purified by recrystallization using a vapor diffusion method (AcOEt/hexane) to give a white solid (108 mg, 54%).

<sup>1</sup>H NMR (500 MHz, CDCl<sub>3</sub>) δ 9.04 (s, 1H), 7.99 (dd, 1H, *J* = 8.0, 1.7 Hz), 7.88 (d, 1H, *J* = 1.7 Hz), 7.79 (dd, 1H, *J* = 8.0, 1.2 Hz), 7.76 (d, 1H, *J* = 8.6 Hz), 7.69 (dd, 1H, *J* = 8.6, 2.3 Hz), 7.43 (ddd, 1H, *J* = 8.0, 7.5, 1.7 Hz), 7.30 (ddd, 1H, *J* = 8.0, 7.5, 1.2 Hz), 5.14 (s, 1H), 4.44 (d, 1H, *J* = 14.9 Hz), 3.68 (d, 1H, *J* = 14.9 Hz), 1.62 (s, 3H). <sup>13</sup>C NMR (125 MHz, CDCl<sub>3</sub>) δ 171.4, 141.1, 138.3, 135.9, 135.8, 135.5, 134.1 (q, *J* = 33.4 Hz), 131.3, 127.9, 122.1 (q, *J* = 271.8 Hz), 122.0, 121.5, 117.4 (q, *J* = 4.8 Hz), 115.5, 105.0, 74.5, 59.3, 27.7. FAB-MS *m/z* 491 (M+H)<sup>+</sup>. Anal. Calcd for C<sub>18</sub>H<sub>14</sub>BrF<sub>3</sub>N<sub>2</sub>O<sub>4</sub>S: C, 44.01; H, 2.87; N, 5.70. Found: C, 44.07; H, 2.97; N, 5.73. Purity: 99.8% (HPLC area %).

**(*R*)-3-((3-Bromophenyl)sulfonyl)-*N*-(4-cyano-3-(trifluoromethyl)phenyl)-2-hydroxy-2-methylpropanamide (14b)**

This compound was prepared from compound **21** (143 mg, 0.407 mmol), 3-bromothiophenol (56.0 μL, 0.543 mmol), 60% NaH (21.4 mg, 0.892 mmol), THF (3.5 mL), 70% *m*CPBA (301 mg, 1.22 mmol) and CH<sub>2</sub>Cl<sub>2</sub> (3.5 mL) according to GP-A, and purified by recrystallization using a vapor diffusion method (AcOEt/hexane) to give a white solid (141 mg, 71%).

<sup>1</sup>H NMR (500 MHz, CDCl<sub>3</sub>) δ 9.06 (s, 1H), 7.97-7.96 (m, 2H), 7.82-7.73 (m, 4H), 7.41 (dd, 1H, *J* = 8.0, 8.0 Hz), 5.03 (s, 1H), 4.02 (d, 1H, *J* = 14.3 Hz), 3.50 (d, 1H, *J* = 14.3 Hz), 1.61 (s, 3H). <sup>13</sup>C NMR (125 MHz, CDCl<sub>3</sub>) δ 171.4, 141.0, 140.8, 137.7, 136.0, 134.3 (q, *J* = 32.8 Hz), 131.2, 131.0, 126.7, 123.5, 122.2 (q, *J* = 273.5 Hz), 122.0, 117.5 (q, *J* = 4.8 Hz), 115.5, 105.3, 74.5, 61.5, 28.0. FAB-MS *m/z* 491 (M+H)<sup>+</sup>. HRMS (ESI-TOF) *m/z* (M-H)<sup>-</sup> calcd. for 490.9707; Found 490.9716. Purity: 97.1% (HPLC area %).

**(*R*)-3-((4-Bromophenyl)sulfonyl)-*N*-(4-cyano-3-(trifluoromethyl)phenyl)-2-hydroxy-2-methylpropanamide (14c)**

This compound was prepared from compound **21** (143 mg, 0.407 mmol), 4-bromothiophenol (103 mg, 0.543 mmol), 60% NaH (21.4 mg, 0.892 mmol), THF (3.5 mL), 70% *m*CPBA (301 mg, 1.22 mmol) and CH<sub>2</sub>Cl<sub>2</sub> (3.5 mL) according to GP-A, and purified by recrystallization using a vapor diffusion method (AcOEt/hexane) to give a white solid (145 mg, 73%).

<sup>1</sup>H NMR (500 MHz, CDCl<sub>3</sub>) δ 9.03 (s, 1H), 7.94 (d, 1H, *J* = 1.7 Hz), 7.81 (d, 1H, *J* = 8.6 Hz), 7.76 (dd, 1H, *J* = 8.6, 2.3 Hz), 7.72 (br d, 2H, *J* = 8.6 Hz), 7.62 (br d, 2H, *J* = 8.6 Hz), 5.00 (s, 1H), 4.00 (d, 1H, *J* = 14.6 Hz),

3.47 (d, 1H,  $J = 14.3$  Hz), 1.60 (s, 3H).  $^{13}\text{C}$  NMR (125 MHz,  $\text{CDCl}_3$ )  $\delta$  171.7, 141.2, 138.1, 135.9, 134.2 (q,  $J = 33.4$  Hz), 132.8, 130.1, 129.6, 122.1 (q,  $J = 273.0$  Hz), 121.9, 117.33 (q,  $J = 4.8$  Hz), 115.5, 105.0, 74.2, 62.0, 27.9. FAB-MS  $m/z$  491 (M+H) $^+$ . Anal. Calcd for  $\text{C}_{18}\text{H}_{14}\text{BrF}_3\text{N}_2\text{O}_4\text{S}$ : C, 44.01; H, 2.87; N, 5.70. Found: C, 43.92; H, 2.90; N, 5.67. Purity: 99.7% (HPLC area %).

**(R)-N-(4-Cyano-3-(trifluoromethyl)phenyl)-2-hydroxy-3-((2-methoxyphenyl)sulfonyl)-2-methylpropanamide (15a)**

This compound was prepared from compound **21** (97 mg, 0.276 mmol), 2-methoxythiophenol (45.2  $\mu\text{L}$ , 0.368 mmol), 60% NaH (15 mg, 0.604 mmol), THF (3.5 mL), 70% *m*CPBA (204 mg, 0.828 mmol) and  $\text{CH}_2\text{Cl}_2$  (3.5 mL) according to GP-A, and purified by recrystallization using a vapor diffusion method (AcOEt/hexane) to give a white solid (39.9 mg, 33%).

$^1\text{H}$  NMR (500 MHz,  $\text{CDCl}_3$ )  $\delta$  9.05 (s, 1H), 7.85 (d, 1H,  $J = 1.7$  Hz), 7.74 (dd, 1H,  $J = 8.0, 1.7$  Hz), 7.72 (d, 1H,  $J = 8.6$  Hz), 7.57 (dd, 1H,  $J = 8.6, 2.3$  Hz), 7.49 (ddd, 1H,  $J = 8.0, 8.0, 1.7$  Hz), 7.04 (d, 1H,  $J = 8.0$  Hz), 6.81 (dd, 1H,  $J = 8.0, 7.5$  Hz), 5.40 (s, 1H), 4.41 (d, 1H,  $J = 14.6$  Hz), 4.06 (s, 3H), 3.54 (d, 1H,  $J = 14.6$  Hz), 1.56 (s, 3H).  $^{13}\text{C}$  NMR (125 MHz,  $\text{CDCl}_3$ )  $\delta$  171.7, 158.1, 141.1, 136.6, 135.7, 133.9 (q,  $J = 32.8$  Hz), 129.7, 126.2, 122.2 (q,  $J = 274.3$  Hz), 121.9, 120.5, 117.4 (q,  $J = 4.8$  Hz), 115.6, 112.8, 104.8, 74.2, 59.3, 56.7, 27.9. FAB-MS  $m/z$  443 (M+H) $^+$ . Anal. Calcd for  $\text{C}_{19}\text{H}_{17}\text{F}_3\text{N}_2\text{O}_5\text{S}$ : C, 51.58; H, 3.87; N, 6.33. Found: C, 51.84; H, 3.99; N, 6.43. Purity: 99.5% (HPLC area %).

**(R)-N-(4-Cyano-3-(trifluoromethyl)phenyl)-2-hydroxy-3-((3-methoxyphenyl)sulfonyl)-2-methylpropanamide (15b)**

This compound was prepared from compound **21** (97.0 mg, 0.276 mmol), 3-methoxythiophenol (45.2  $\mu\text{L}$ , 0.368 mmol), 60% NaH (15.0 mg, 0.604 mmol), THF (3.5 mL), 70% *m*CPBA (204 mg, 0.828 mmol) and  $\text{CH}_2\text{Cl}_2$  (3.5 mL) according to GP-A, and purified by recrystallization using a vapor diffusion method (AcOEt/hexane) to give a white solid (54.9 mg, 45%).

$^1\text{H}$  NMR (500 MHz,  $\text{CDCl}_3$ )  $\delta$  9.22 (s, 1H), 8.02 (d, 1H,  $J = 1.7$  Hz), 7.80 (dd, 1H,  $J = 8.0, 1.7$  Hz), 7.76 (d, 1H,  $J = 8.0$  Hz), 7.45 (d, 1H,  $J = 8.0$  Hz), 7.40 (dd, 1H,  $J = 8.0, 7.5$  Hz), 7.34 (dd, 1H,  $J = 2.0$  Hz), 7.14-7.11 (m, 1H), 5.15 (s, 1H), 4.03 (d, 1H,  $J = 14.3$  Hz), 3.77 (s, 3H), 3.52 (d, 1H,  $J = 14.3$  Hz), 1.61 (s, 3H).  $^{13}\text{C}$  NMR (125 MHz,  $\text{CDCl}_3$ )  $\delta$  171.8, 160.2, 141.4, 140.1, 135.8, 134.0 (q,  $J = 32.8$  Hz), 130.7, 122.2 (q,  $J = 274.3$  Hz), 122.1, 120.6, 120.0, 117.5 (q,  $J = 4.8$  Hz), 115.6, 112.8, 104.8, 74.5, 61.7, 55.8, 27.9. FAB-MS

$m/z$  443 (M+H)<sup>+</sup>. Anal. Calcd for C<sub>19</sub>H<sub>17</sub>F<sub>3</sub>N<sub>2</sub>O<sub>5</sub>S: C, 51.58; H, 3.87; N, 6.33. Found: C, 51.61; H, 3.95; N, 6.43. Purity: 99.3% (HPLC area %).

**(R)-N-(4-Cyano-3-(trifluoromethyl)phenyl)-2-hydroxy-3-((4-methoxyphenyl)sulfonyl)-2-methylpropanamide (15c)**

This compound was prepared from compound **21** (97.0 mg, 0.276 mmol), 4-methoxythiophenol (45.2  $\mu$ L, 0.368 mmol), 60% NaH (15.0 mg, 0.604 mmol), THF (3.5 mL), 70% *m*CPBA (204 mg, 0.828 mmol) and CH<sub>2</sub>Cl<sub>2</sub> (3.5 mL) according to GP-A, and purified by recrystallization using a vapor diffusion method (AcOEt/hexane) to give a white solid (75.5 mg, 62%).

<sup>1</sup>H NMR (500 MHz, CDCl<sub>3</sub>)  $\delta$  9.07 (s, 1H), 7.98 (d, 1H,  $J$  = 2.3 Hz), 7.80-7.76 (m, 3H), 7.72 (dd, 1H,  $J$  = 8.6, 2.3 Hz), 6.89 (br d, 2H, 8.6 Hz), 5.30 (s, 1H), 3.97 (d, 1H,  $J$  = 14.3 Hz), 3.81 (s, 3H), 3.44 (d, 1H,  $J$  = 14.3 Hz), 1.59 (s, 3H). <sup>13</sup>C NMR (125 MHz, CDCl<sub>3</sub>)  $\delta$  171.7, 164.5, 141.3, 135.8, 134.1 (q,  $J$  = 33.4 Hz), 133.9, 130.4, 130.1, 122.1 (q,  $J$  = 273.0 Hz), 121.9, 117.4 (q,  $J$  = 4.8 Hz), 115.5, 115.2, 114.7, 104.9, 74.3, 61.5, 55.8, 28.0. FAB-MS  $m/z$  443 (M+H)<sup>+</sup>. Anal. Calcd for C<sub>19</sub>H<sub>17</sub>F<sub>3</sub>N<sub>2</sub>O<sub>5</sub>S: C, 51.58; H, 3.87; N, 6.33. Found: C, 51.56; H, 3.91; N, 6.36. Purity: 99.5% (HPLC area %).

**(R)-N-(4-Cyano-3-(trifluoromethyl)phenyl)-2-hydroxy-2-methyl-3-(phenylsulfonyl)propanamide (16)**

This compound was prepared from compound **21** (100 mg, 0.285 mmol), thiophenol (38.7  $\mu$ L, 0.38 mmol), 60% NaH (15.0 mg, 0.624 mmol), THF (3.5 mL), 70% *m*CPBA (186 mg, 0.754 mmol) and CH<sub>2</sub>Cl<sub>2</sub> (3.5 mL) according to GP-A, and purified by recrystallization using a vapor diffusion method (AcOEt/hexane) to give a white solid (31.2 mg, 27%).

<sup>1</sup>H NMR (500 MHz, CDCl<sub>3</sub>)  $\delta$  9.09 (s, 1H), 7.95 (d, 1H,  $J$  = 2.3 Hz), 7.88-7.86 (m, 2H), 7.79 (d, 1H,  $J$  = 8.6 Hz), 7.75 (dd, 1H,  $J$  = 8.6, 1.7 Hz), 7.64 (ddd, 1H,  $J$  = 7.5, 7.5, 1.2 Hz), 7.52-7.47 (m, 2H), 5.19 (s, 1H), 3.98 (d, 1H,  $J$  = 14.9 Hz), 3.50 (d, 1H,  $J$  = 14.9 Hz), 1.61 (s, 3H). <sup>13</sup>C NMR (125 MHz, CDCl<sub>3</sub>)  $\delta$  171.5, 141.1, 139.0, 135.8, 134.7, 134.2 (q,  $J$  = 33.4 Hz), 129.6, 128.0, 122.1 (q,  $J$  = 273.1 Hz), 122.0, 117.5 (q,  $J$  = 4.8 Hz), 115.4, 105.1, 74.5, 61.3, 27.8. FAB-MS  $m/z$  413 (M+H)<sup>+</sup>. Anal. Calcd for C<sub>18</sub>H<sub>15</sub>F<sub>3</sub>N<sub>2</sub>O<sub>4</sub>S: C, 52.43; H, 3.67; N, 6.79. Found: C, 52.22; H, 3.69; N, 6.97. Purity: 98.9% (HPLC area %).

## Physicochemical properties

### X-ray crystallography

Crystal data for **1a**: C<sub>7</sub>H<sub>4</sub>BrN, white needle crystal, monoclinic,  $a = 3.8910(2)$  Å,  $b = 10.2919(4)$  Å,  $c = 16.3686(7)$  Å,  $\alpha = 90^\circ$ ,  $\beta = 94.963(2)^\circ$ ,  $\gamma = 90^\circ$ ,  $V = 653.036$  Å<sup>3</sup>. CCDC 1828335

Crystal data for **1b**: C<sub>7</sub>H<sub>4</sub>BrN, white needle crystal, monoclinic,  $a = 7.5162(4)$  Å,  $b = 3.9503(2)$  Å,  $c = 22.2292(13)$  Å,  $\alpha = 90^\circ$ ,  $\beta = 93.257(3)^\circ$ ,  $\gamma = 90^\circ$ ,  $V = 658.947$  Å<sup>3</sup>. CCDC 1828336

Crystal data for **1c**: C<sub>7</sub>H<sub>4</sub>BrN, white needle crystal, monoclinic,  $a = 9.4437(1)$  Å,  $b = 8.5227(1)$  Å,  $c = 4.0482(1)$  Å,  $\alpha = 90^\circ$ ,  $\beta = 91.2214(1)^\circ$ ,  $\gamma = 90^\circ$ ,  $V = 325.749$  Å<sup>3</sup>. CCDC 1828334

Crystal data for **2a**: C<sub>8</sub>H<sub>10</sub>S<sub>2</sub>O<sub>4</sub>, FW 232.9937, white columnar crystal, orthorhombic,  $a = 10.1116(2)$  Å,  $b = 12.9234(3)$  Å,  $c = 7.4954(1)$  Å,  $\alpha = 90^\circ$ ,  $\beta = 90^\circ$ ,  $\gamma = 90^\circ$ ,  $V = 979.471$  Å<sup>3</sup>. CCDC 1828329

Crystal data for **2b**: C<sub>8</sub>H<sub>10</sub>S<sub>2</sub>O<sub>4</sub>, FW 232.9937, white plate crystal, monoclinic,  $a = 17.8295(5)$  Å,  $b = 6.9792(2)$  Å,  $c = 7.9202(2)$  Å,  $\alpha = 90^\circ$ ,  $\beta = 92.3238(12)^\circ$ ,  $\gamma = 90^\circ$ ,  $V = 984.745$  Å<sup>3</sup>. CCDC 1828328

Crystal data for **2c**: C<sub>8</sub>H<sub>10</sub>S<sub>2</sub>O<sub>4</sub>, FW 232.9937, white plate crystal, triclinic,  $a = 5.3453(1)$  Å,  $b = 6.6576(1)$  Å,  $c = 6.9904(1)$  Å,  $\alpha = 86.1628(1)^\circ$ ,  $\beta = 88.9324(1)^\circ$ ,  $\gamma = 82.6823(1)^\circ$ ,  $V = 246.174$  Å<sup>3</sup>. CCDC 1828330

Crystal data for **3a**: C<sub>7</sub>H<sub>9</sub>NSO<sub>2</sub>, FW 170.027, white crystal, tetragonal,  $a = 18.5210(4)$  Å,  $b = 18.5210(4)$  Å,  $c = 9.0228(2)$  Å,  $\alpha = 90^\circ$ ,  $\beta = 90^\circ$ ,  $\gamma = 90^\circ$ ,  $V = 3095.07$  Å<sup>3</sup>. CCDC 1828325

Crystal data for **3b**: C<sub>7</sub>H<sub>9</sub>NSO<sub>2</sub>, FW 170.027, white crystal, monoclinic,  $a = 6.9213(2)$  Å,  $b = 14.3941(4)$  Å,  $c = 15.9579(5)$  Å,  $\alpha = 90^\circ$ ,  $\beta = 90.6969(14)^\circ$ ,  $\gamma = 90^\circ$ ,  $V = 1589.7$  Å<sup>3</sup>. CCDC 1828327

Crystal data for **3c**: C<sub>7</sub>H<sub>9</sub>NSO<sub>2</sub>, FW 170.027, white crystal, monoclinic,  $a = 6.6299(2)$  Å,  $b = 16.2473(4)$  Å,  $c = 7.5792(2)$  Å,  $\alpha = 90^\circ$ ,  $\beta = 91.6792(11)^\circ$ ,  $\gamma = 90^\circ$ ,  $V = 816.065$  Å<sup>3</sup>. CCDC 1828326

Crystal data for **4a**: C<sub>6</sub>H<sub>6</sub>N<sub>2</sub>, FW 109.76, colorless plate crystal, monoclinic,  $a = 10.1687(11)$  Å,  $b = 7.4132(13)$  Å,  $c = 7.6623(15)$  Å,  $\alpha = 90^\circ$ ,  $\beta = 100.344(5)^\circ$ ,  $\gamma = 90^\circ$ ,  $V = 568.217$  Å<sup>3</sup>. CCDC 1828331

Crystal data for **4b**: C<sub>6</sub>H<sub>6</sub>N<sub>2</sub>, FW 109.76, white needle crystal, monoclinic,  $a = 8.0887(1)$  Å,  $b = 11.9923(2)$  Å,  $c = 23.8075(4)$  Å,  $\alpha = 90^\circ$ ,  $\beta = 90.9951(6)^\circ$ ,  $\gamma = 90^\circ$ ,  $V = 23.8075(4)$  Å<sup>3</sup>. CCDC 1828332

Crystal data for **4c**: C<sub>6</sub>H<sub>6</sub>N<sub>2</sub>, FW 109.76, pale pink plate crystal, monoclinic  $a = 8.3017(2)$  Å,  $b = 5.8957(1)$  Å,  $c = 22.7478(5)$  Å,  $\alpha = 90^\circ$ ,  $\beta = 93.5648(10)^\circ$ ,  $\gamma = 90^\circ$ ,  $V = 1111.22$  Å<sup>3</sup>. CCDC 1828333

CCDC 1828325-1828336 contain the supplementary crystallographic data for this paper. These data are provided free of charge by The Cambridge Crystallographic Data Centre.

Crystal density and packing coefficient were derived from X-ray crystallographic analysis.



## Physicochemical properties

### Differential scanning calorimetry (DSC)

Entropy and enthalpy of melting were recorded on Shimadzu DSC-60. DSC runs were performed within the temperature range of (melting point - 50 °C) to (melting point + 50 °C) at a heating rate of 5 °C/ min.

### Computational details

Density functional calculations were performed using the Gaussian09 program package.<sup>5</sup> M06-2X density functional<sup>6</sup> and 6-31G\* basis sets<sup>7-9</sup> were used for all calculations. IR spectra and dipole moments of disubstituted benzenes were calculated for their optimized structures.

Intermolecular interaction energy ( $E_{int}$ ): Intermolecular interaction energy ( $E_{int}$ ) of a molecule in a crystal was estimated according to equation 1:

$$E_{int} = \frac{1}{n-1}(E_{all} - E_{center} - E_{others}) \quad (1)$$

where  $n$  is the number of molecules considered,  $E_{all}$  is the energy of a central molecule and non-central molecules whose distance from the central molecule is less than 5 Å in the crystal,  $E_{center}$  is the energy of the central molecule, and  $E_{others}$  is the energy of the non-central molecules (Supplementary Fig. 2). Counterpoise corrections<sup>10,11</sup> were used for calculating  $E_{all}$ ,  $E_{center}$ , and  $E_{others}$ . Molecular geometries were taken from the X-ray crystal structures.

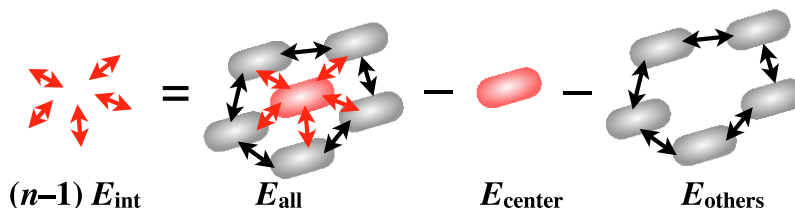

Supplementary Figure 2. Schematic illustration of intermolecular interaction energy ( $E_{int}$ ) of a molecule in a crystal. The arrows indicate interactions between two neighboring molecules.

**<sup>1</sup>H NMR spectra**

**10a**

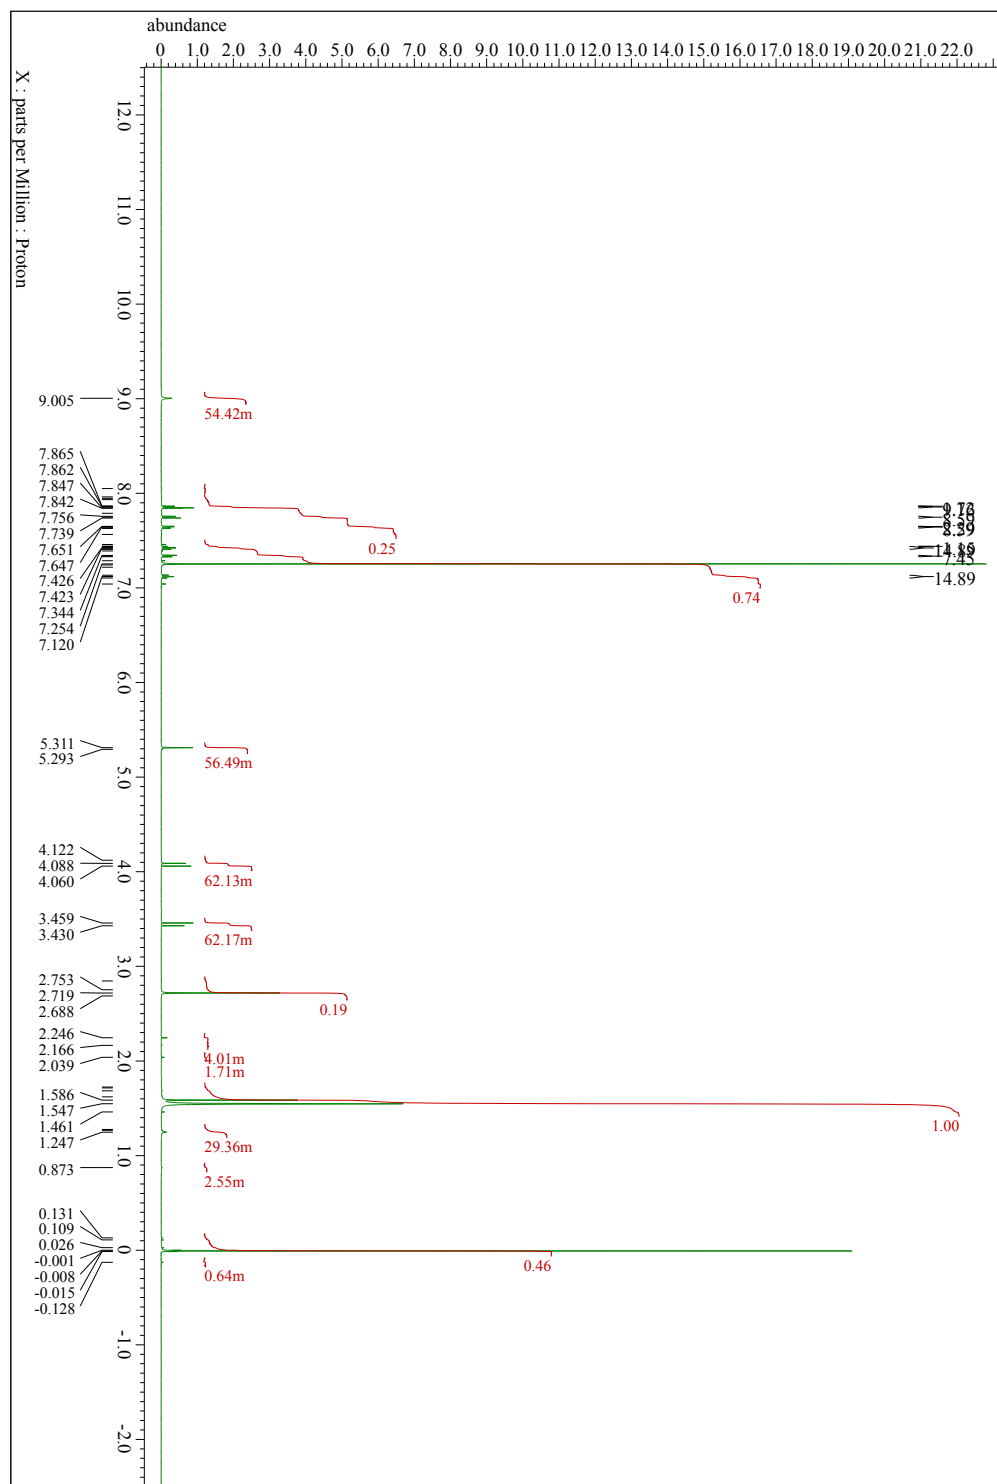

**10b**

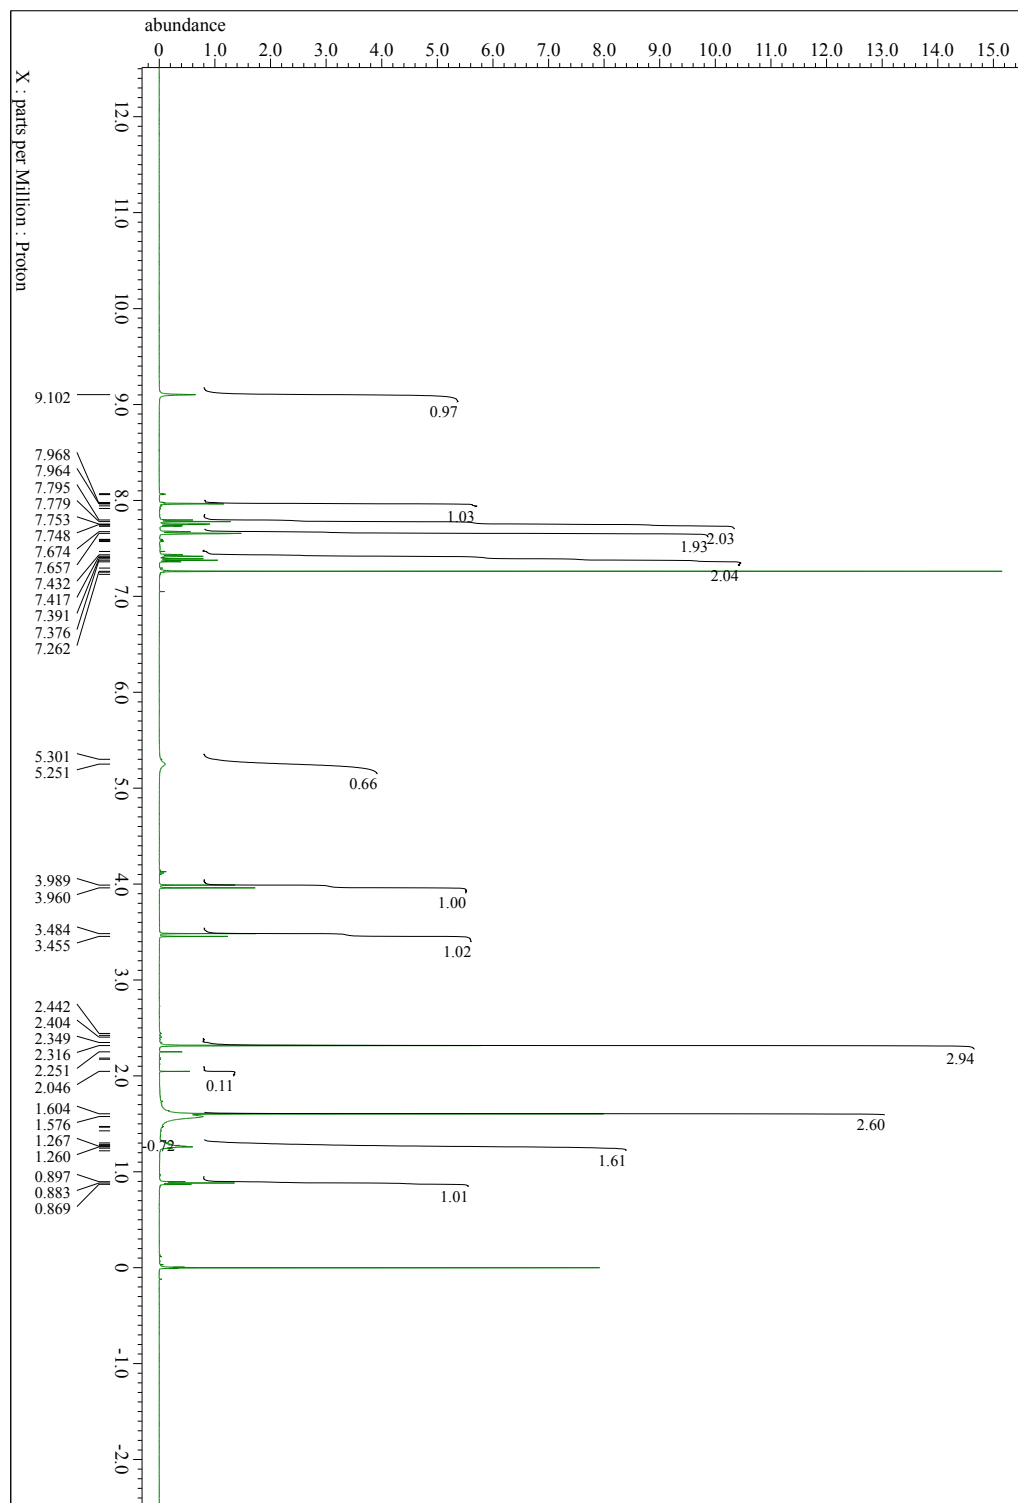

10c

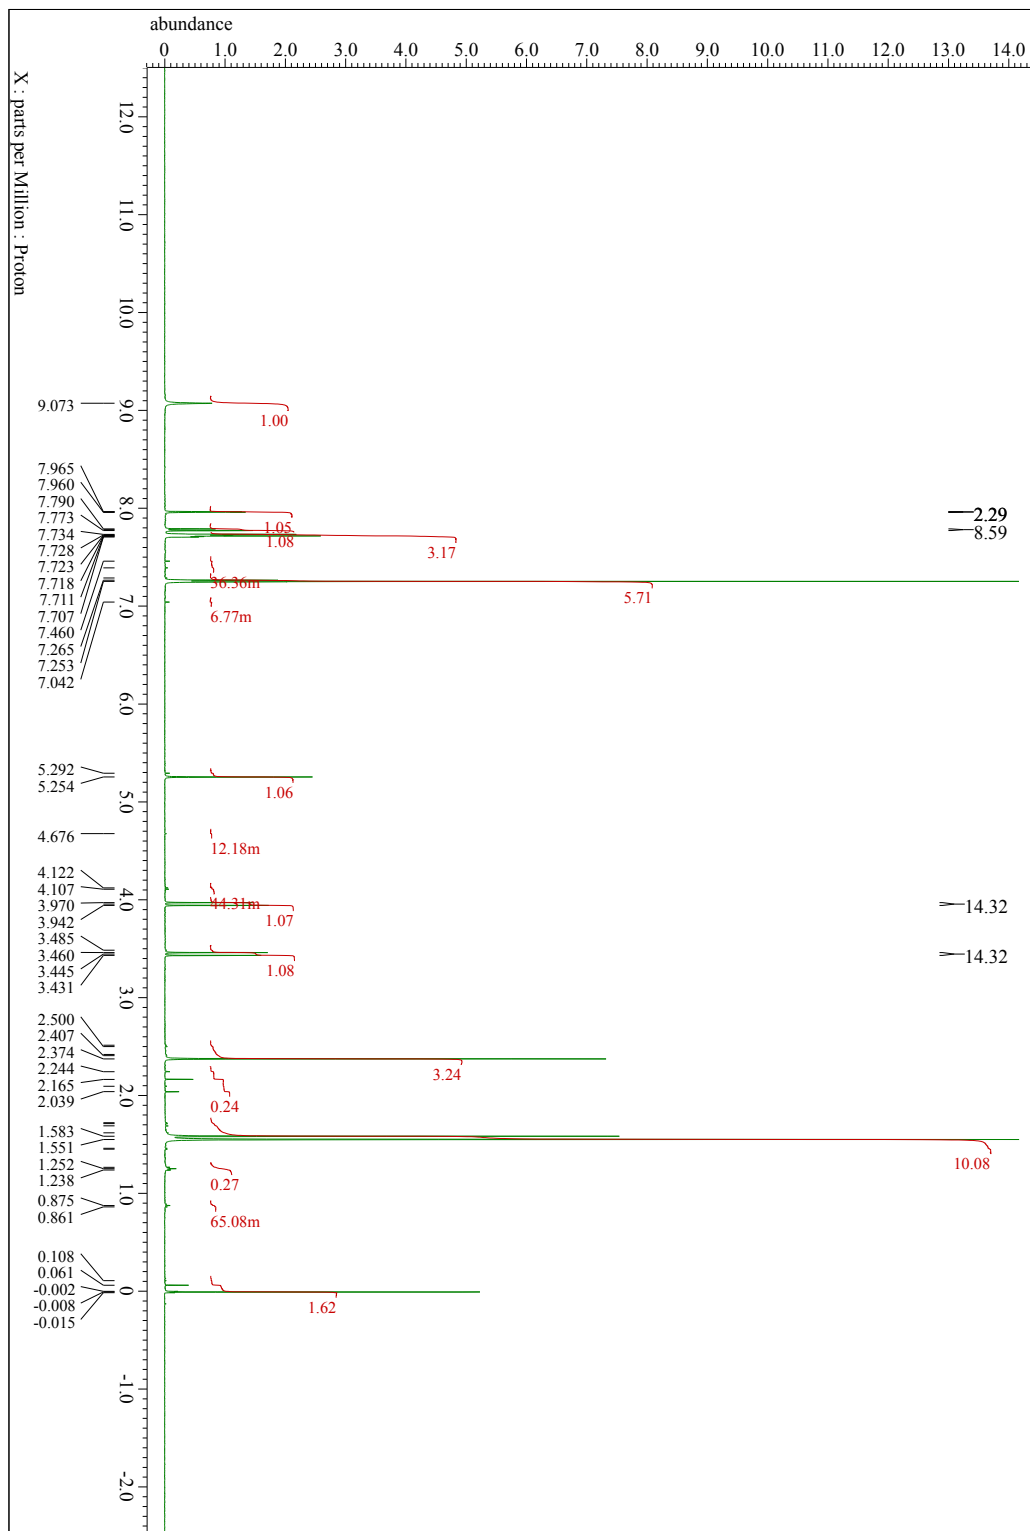

11a

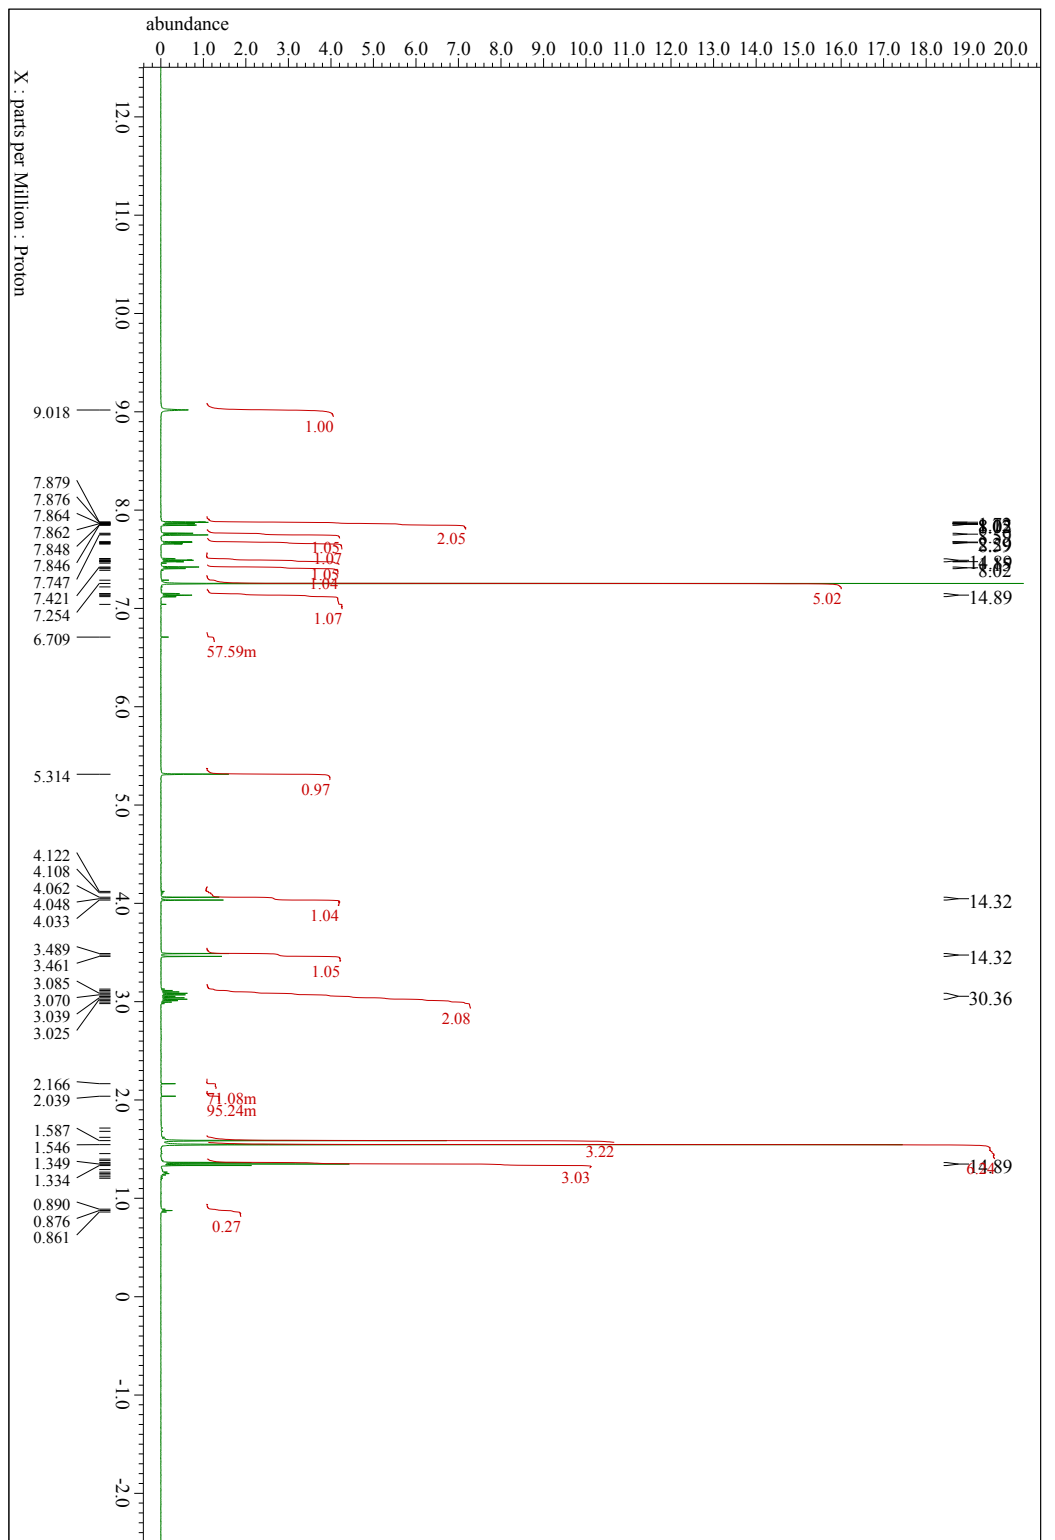

11b

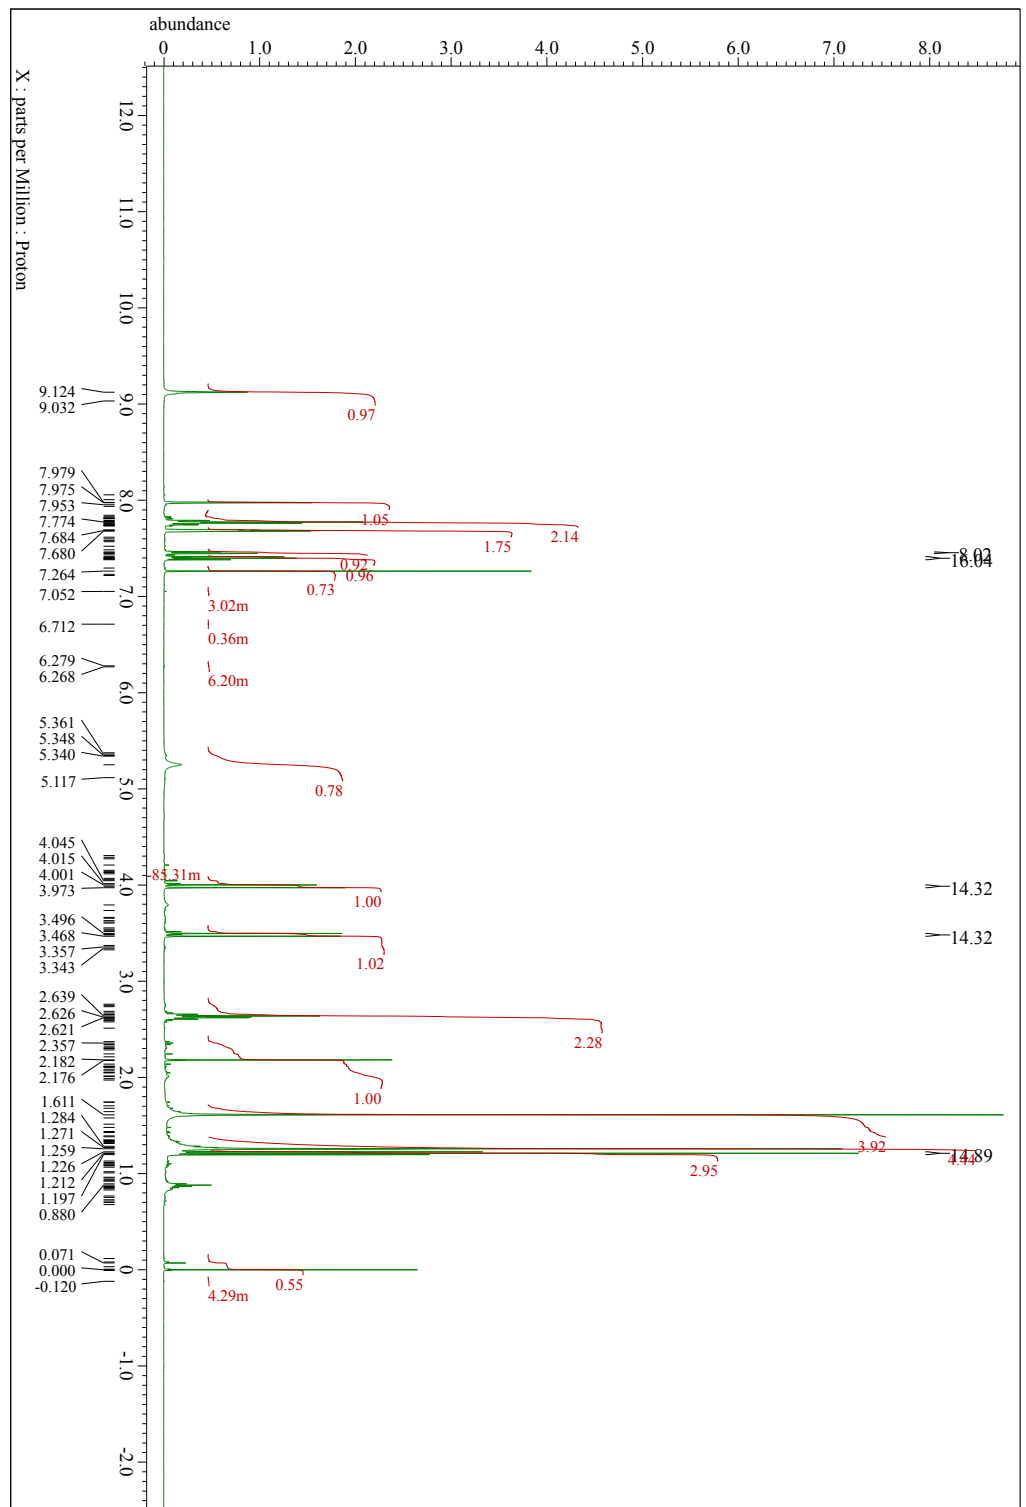

11c

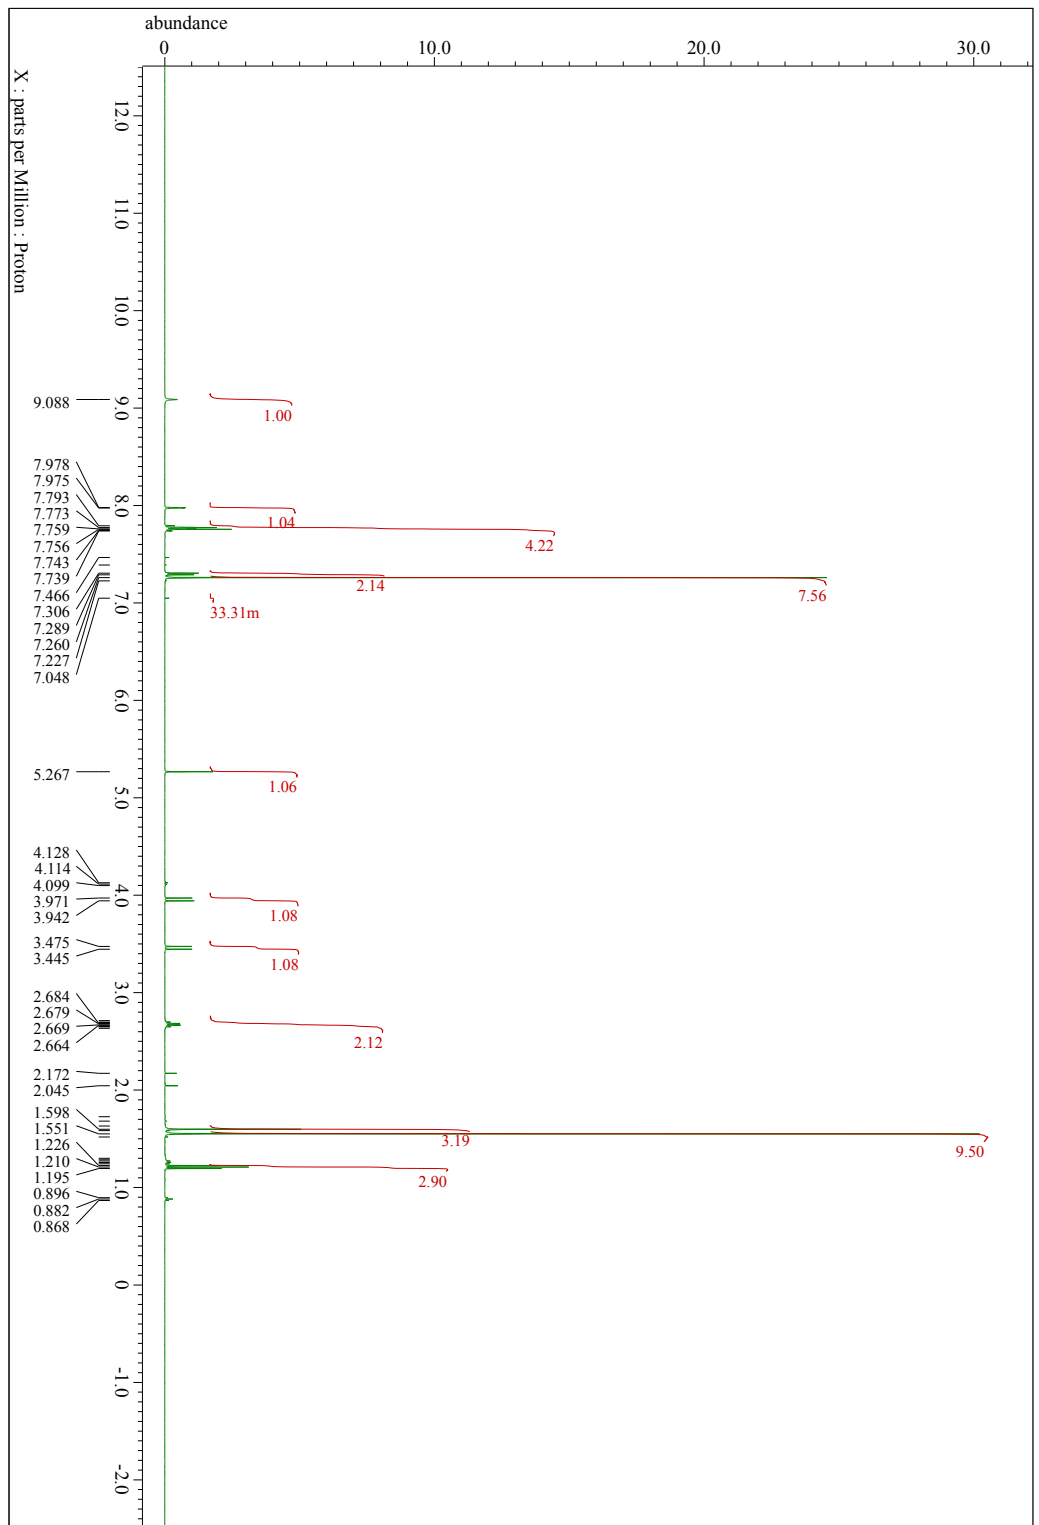

12a

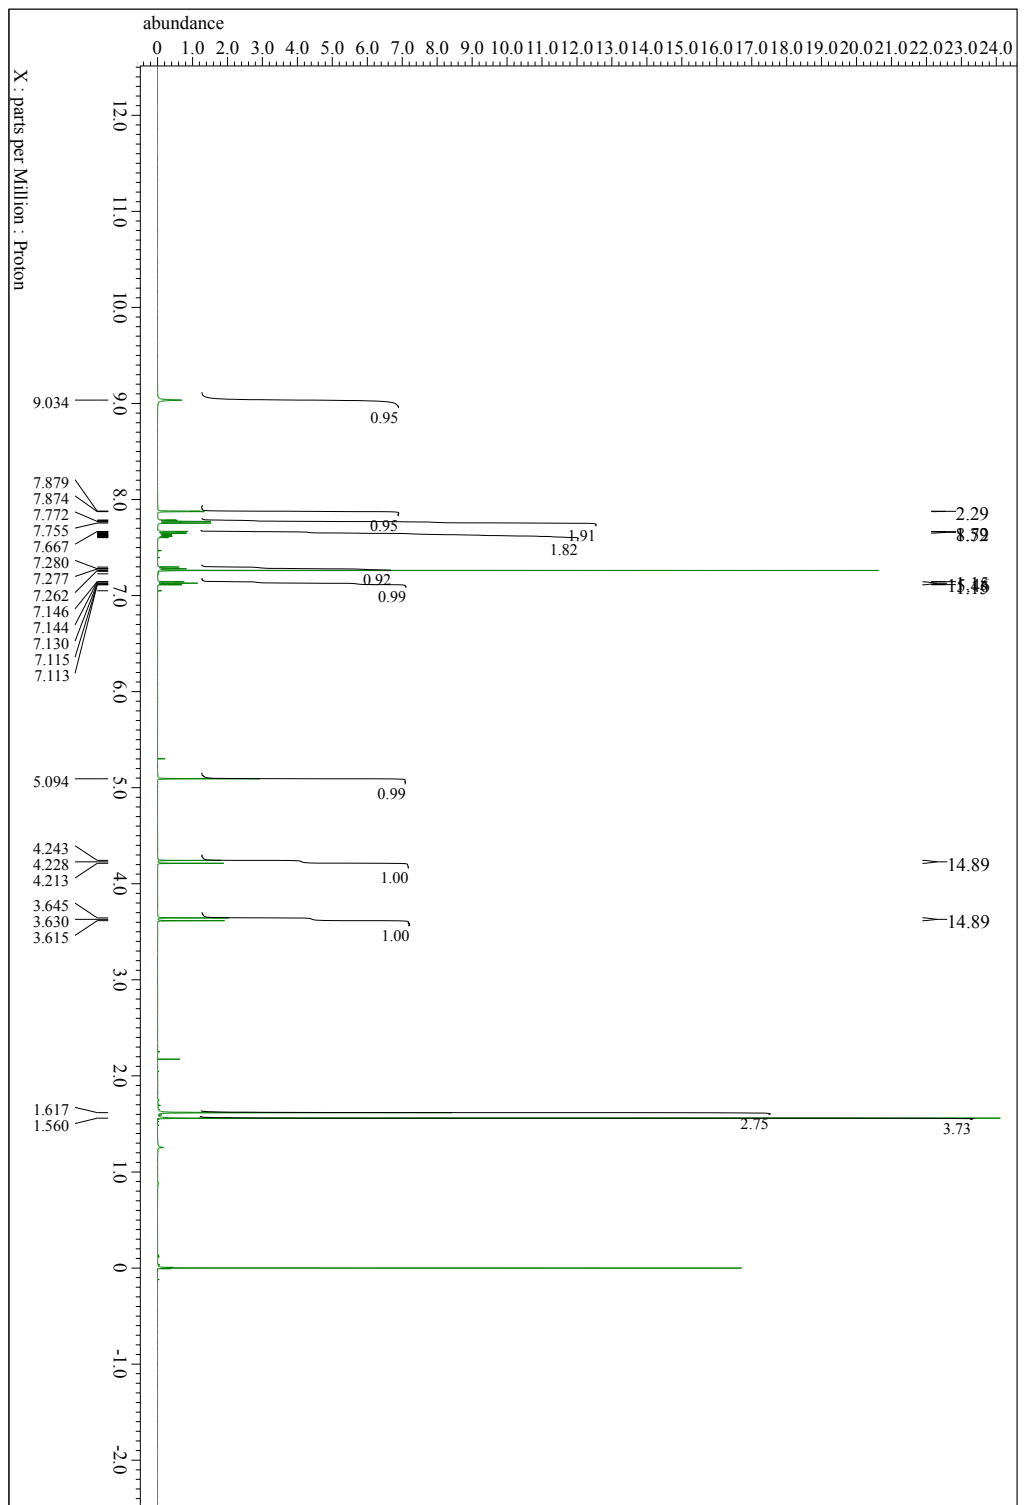

12b



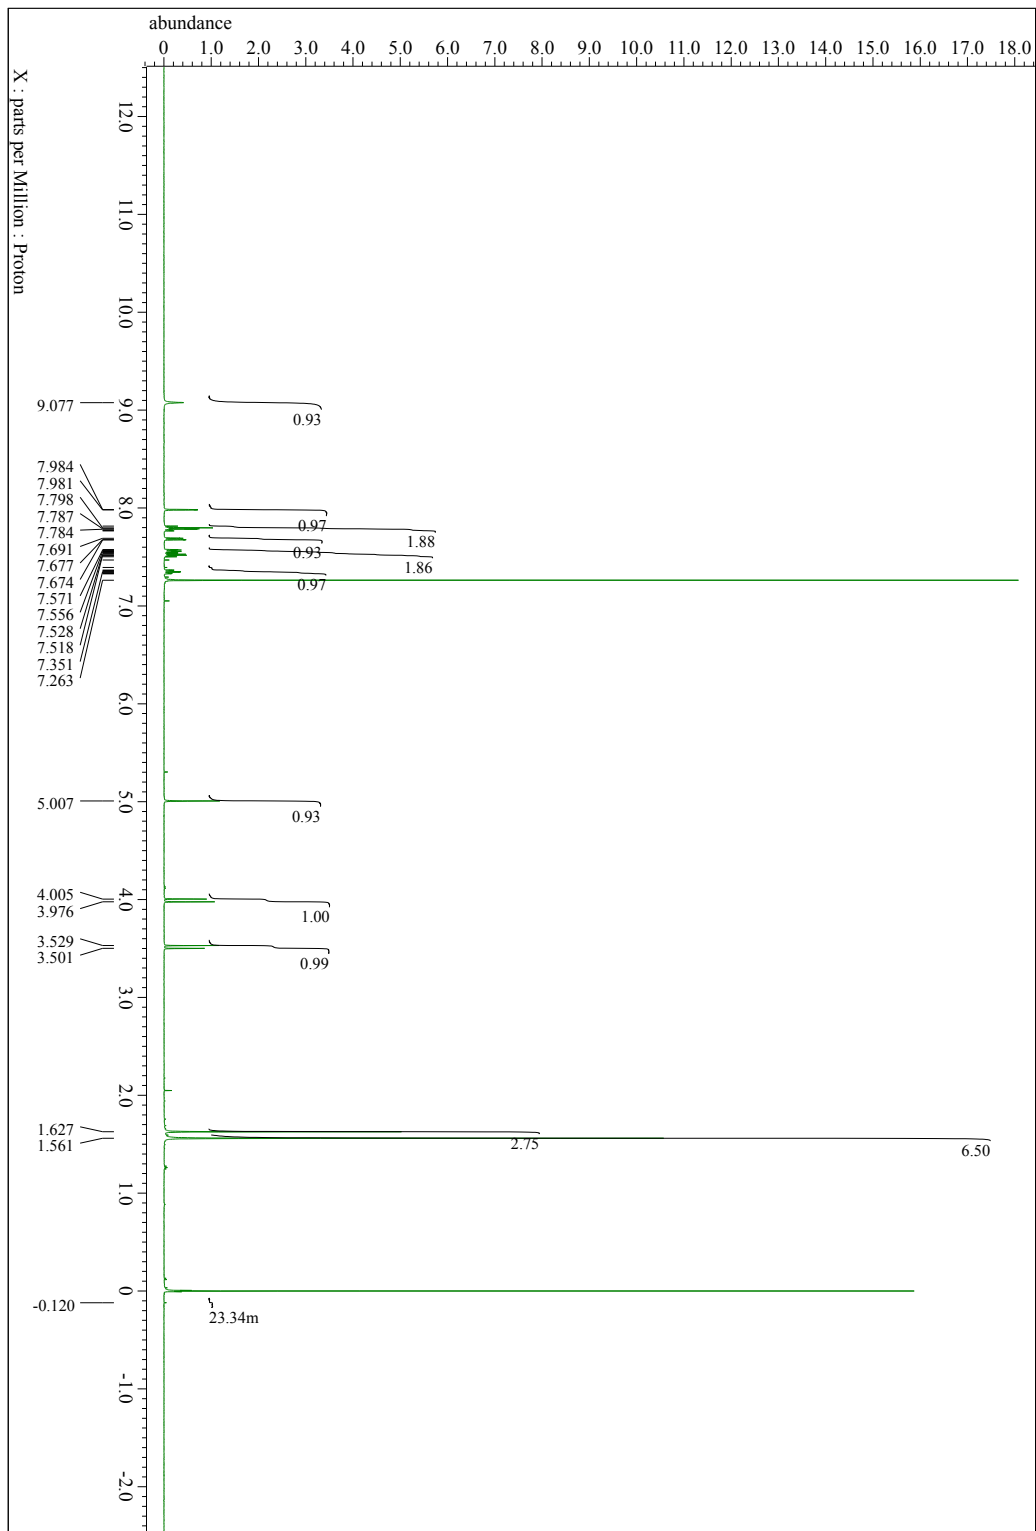

12c

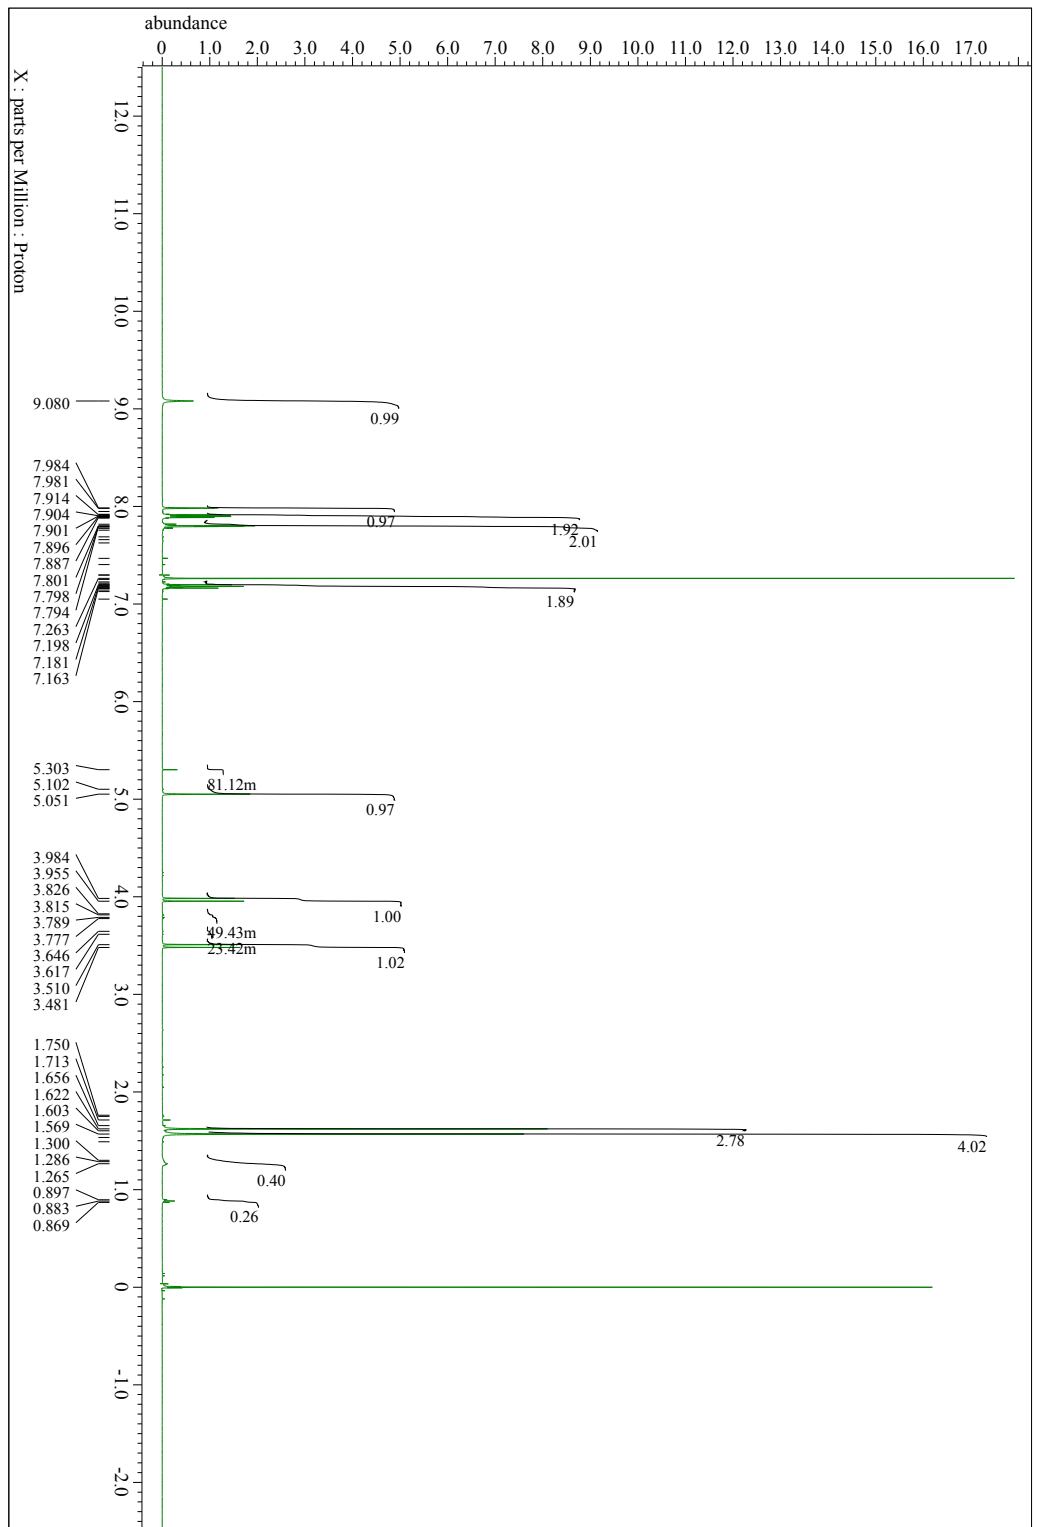

13a

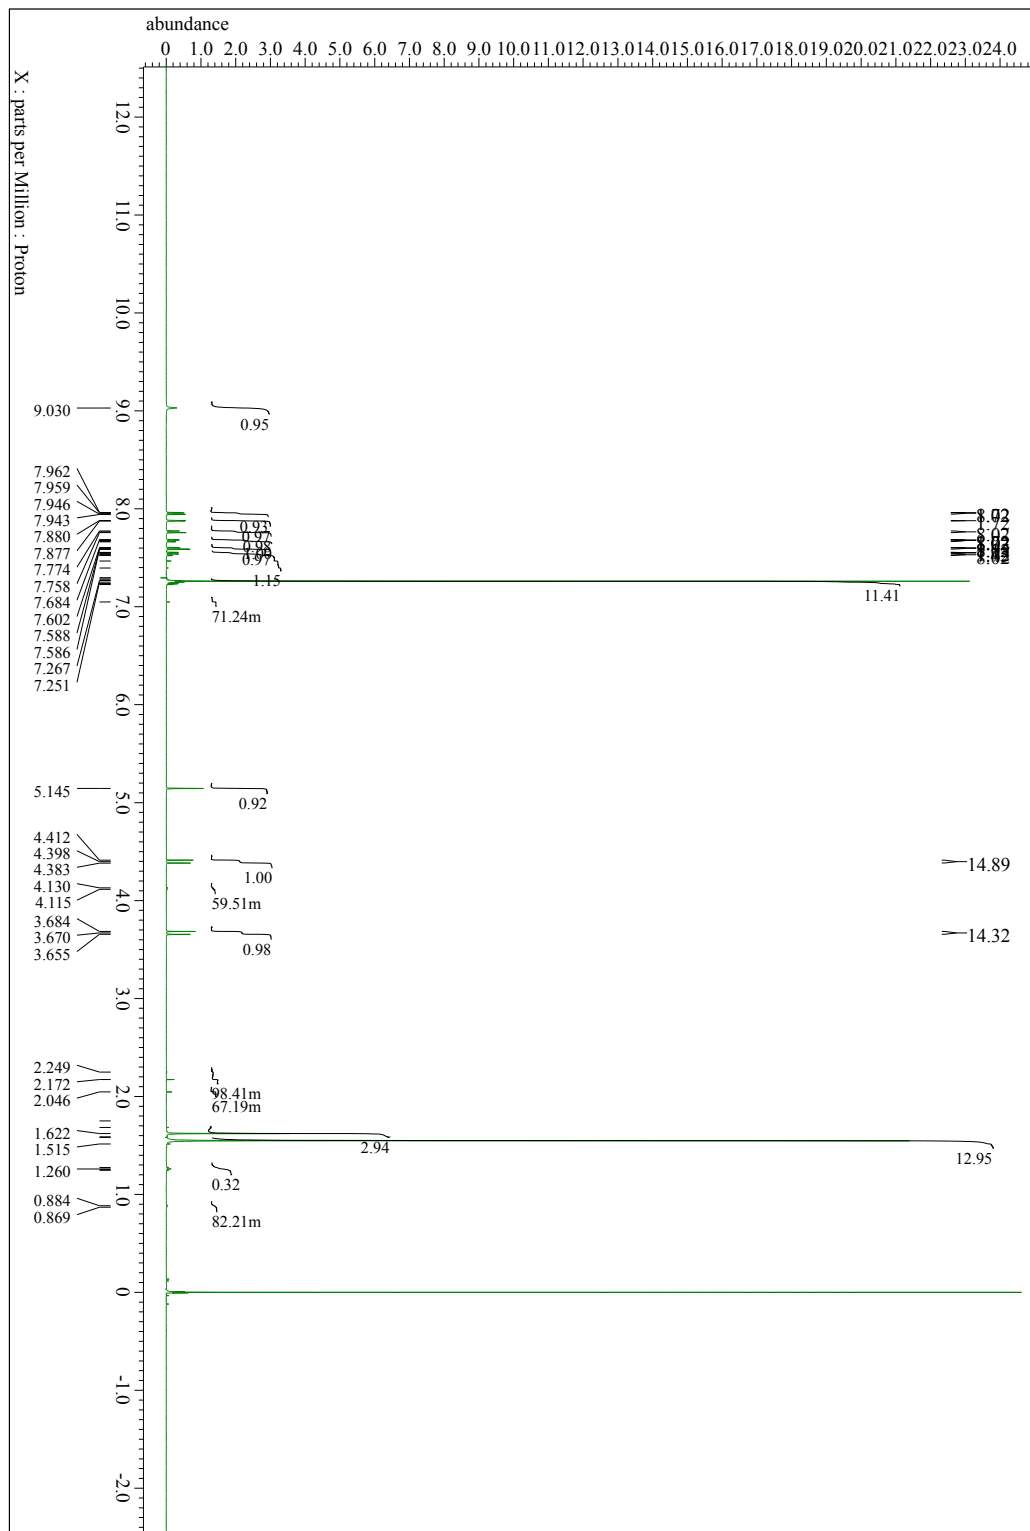

13b

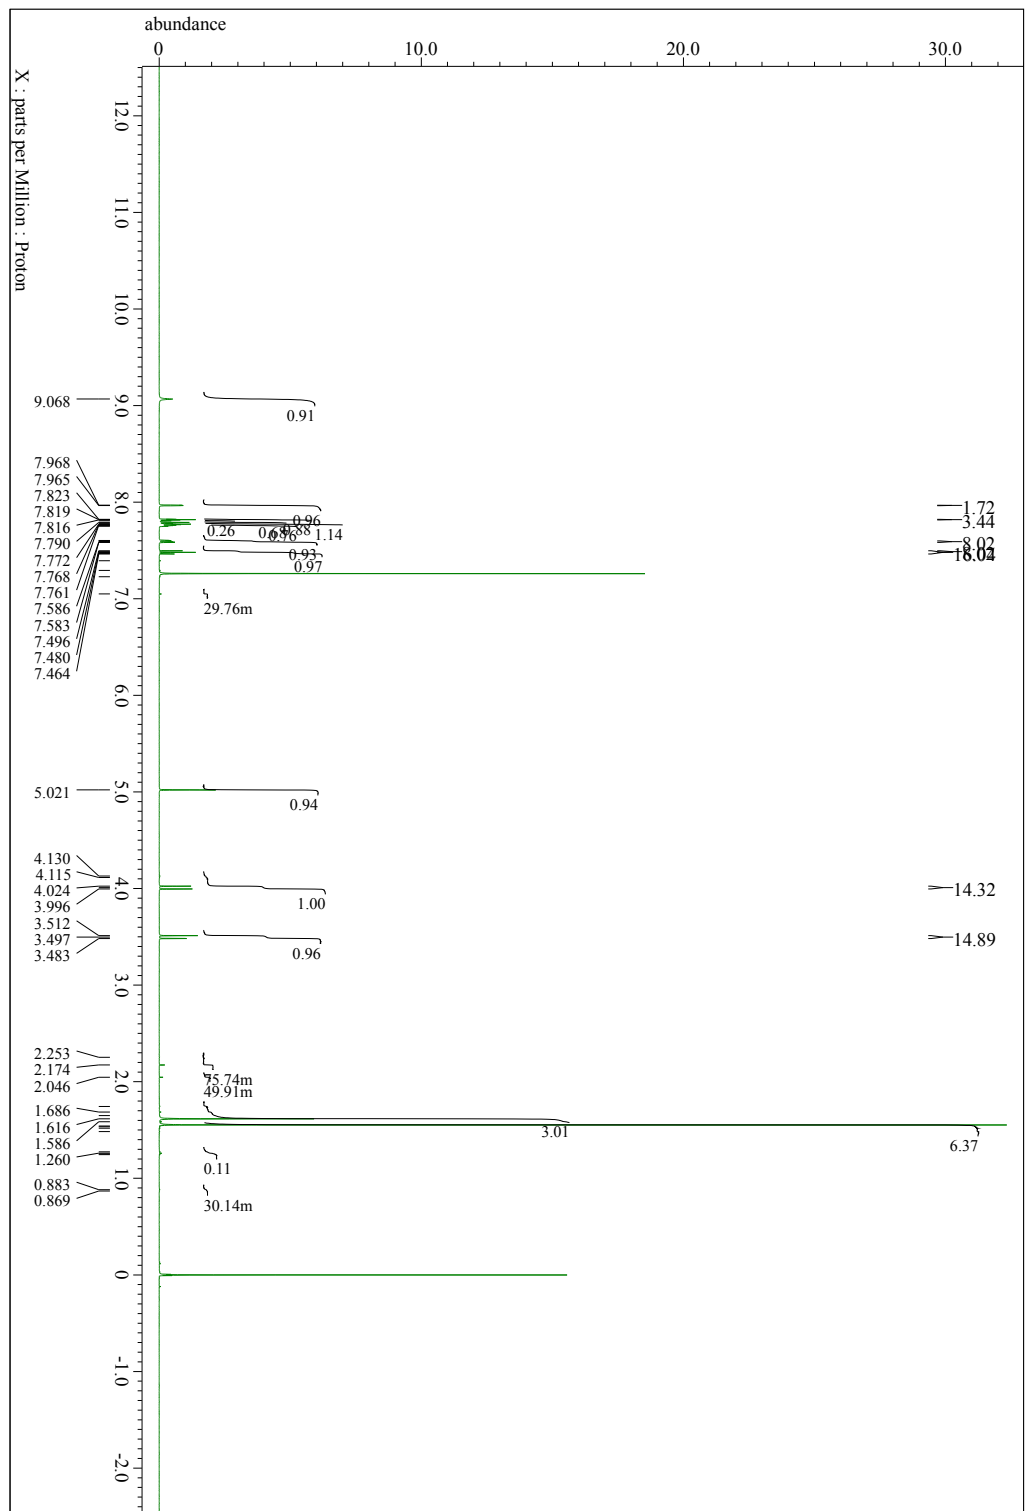

13c

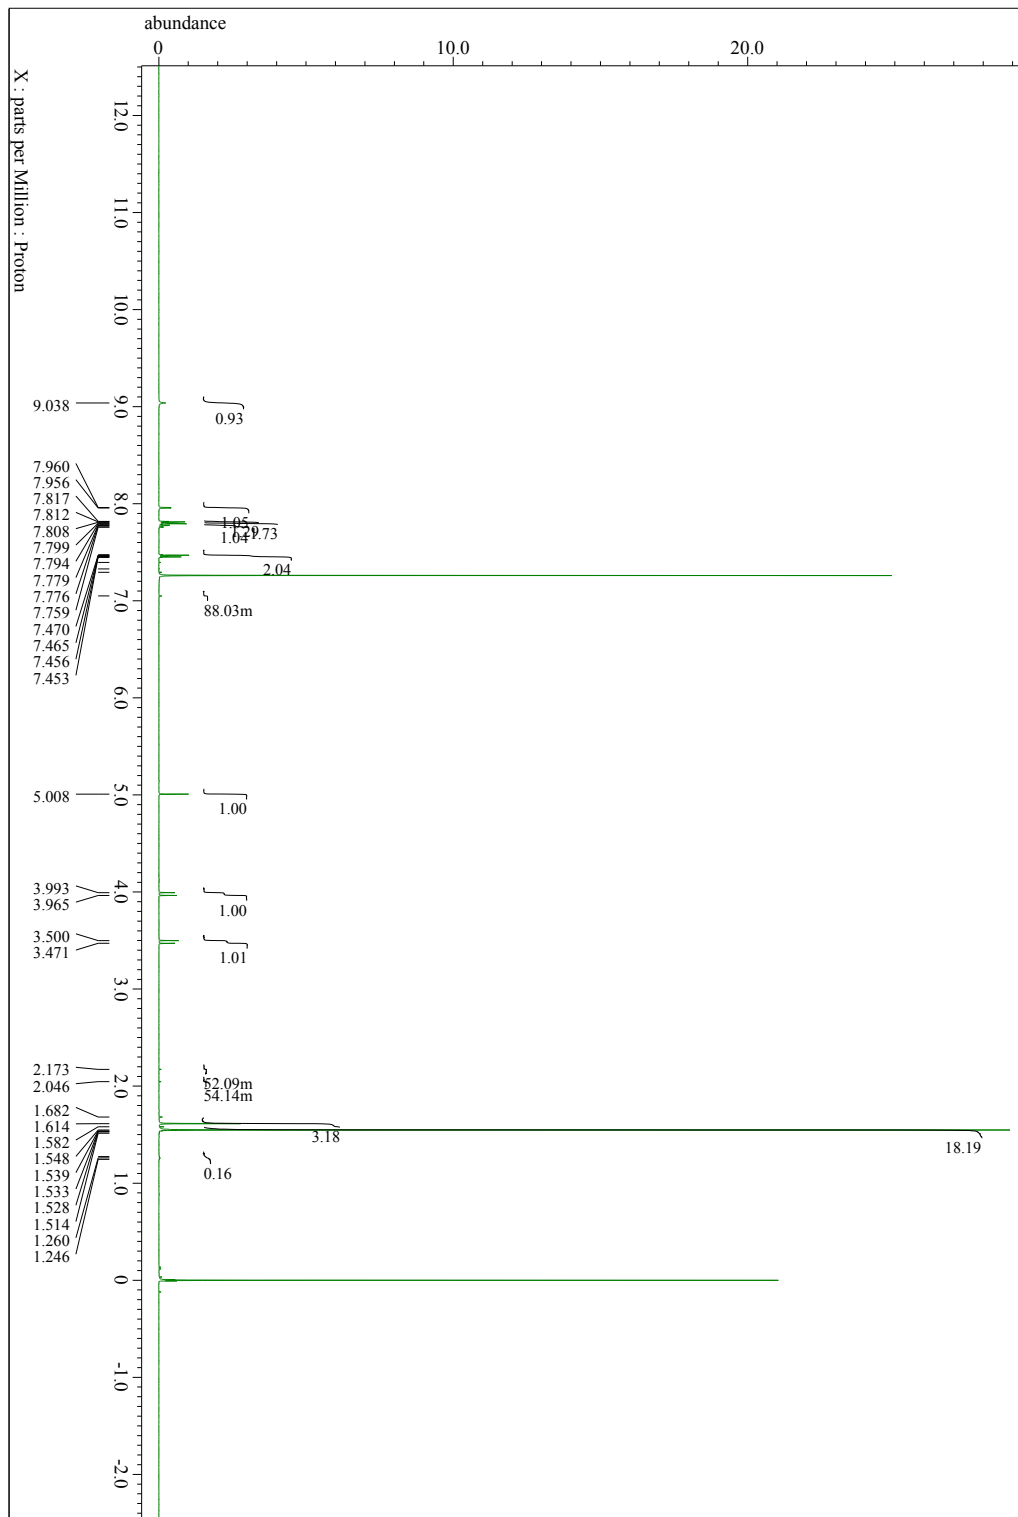

14a

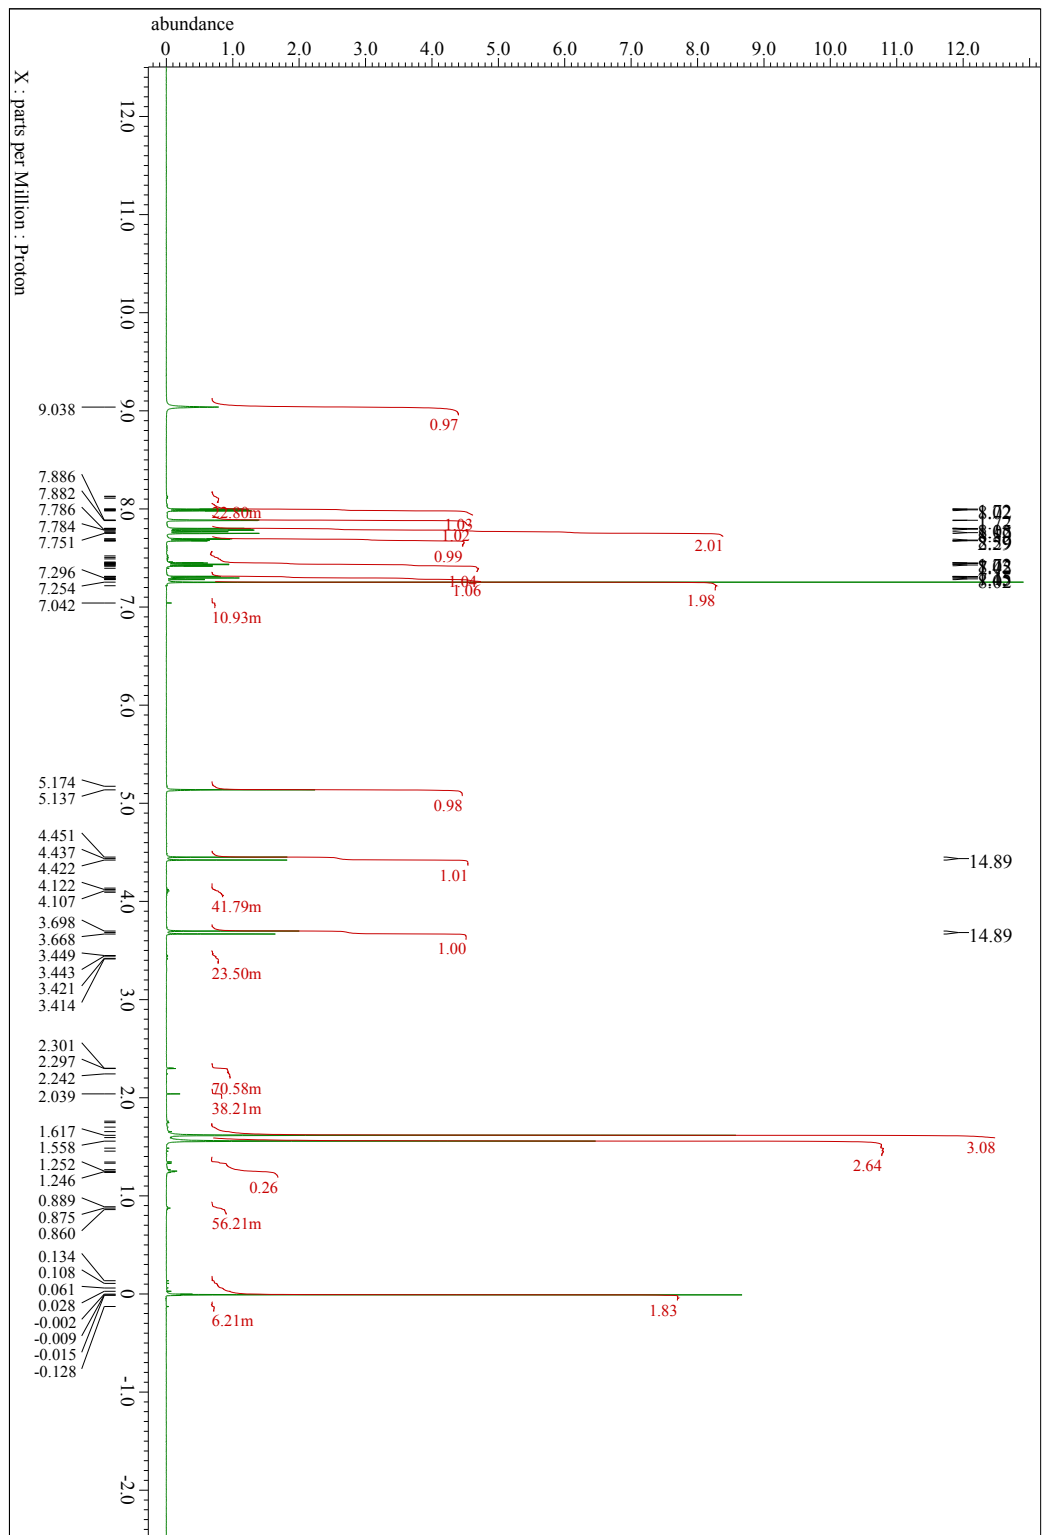

14b

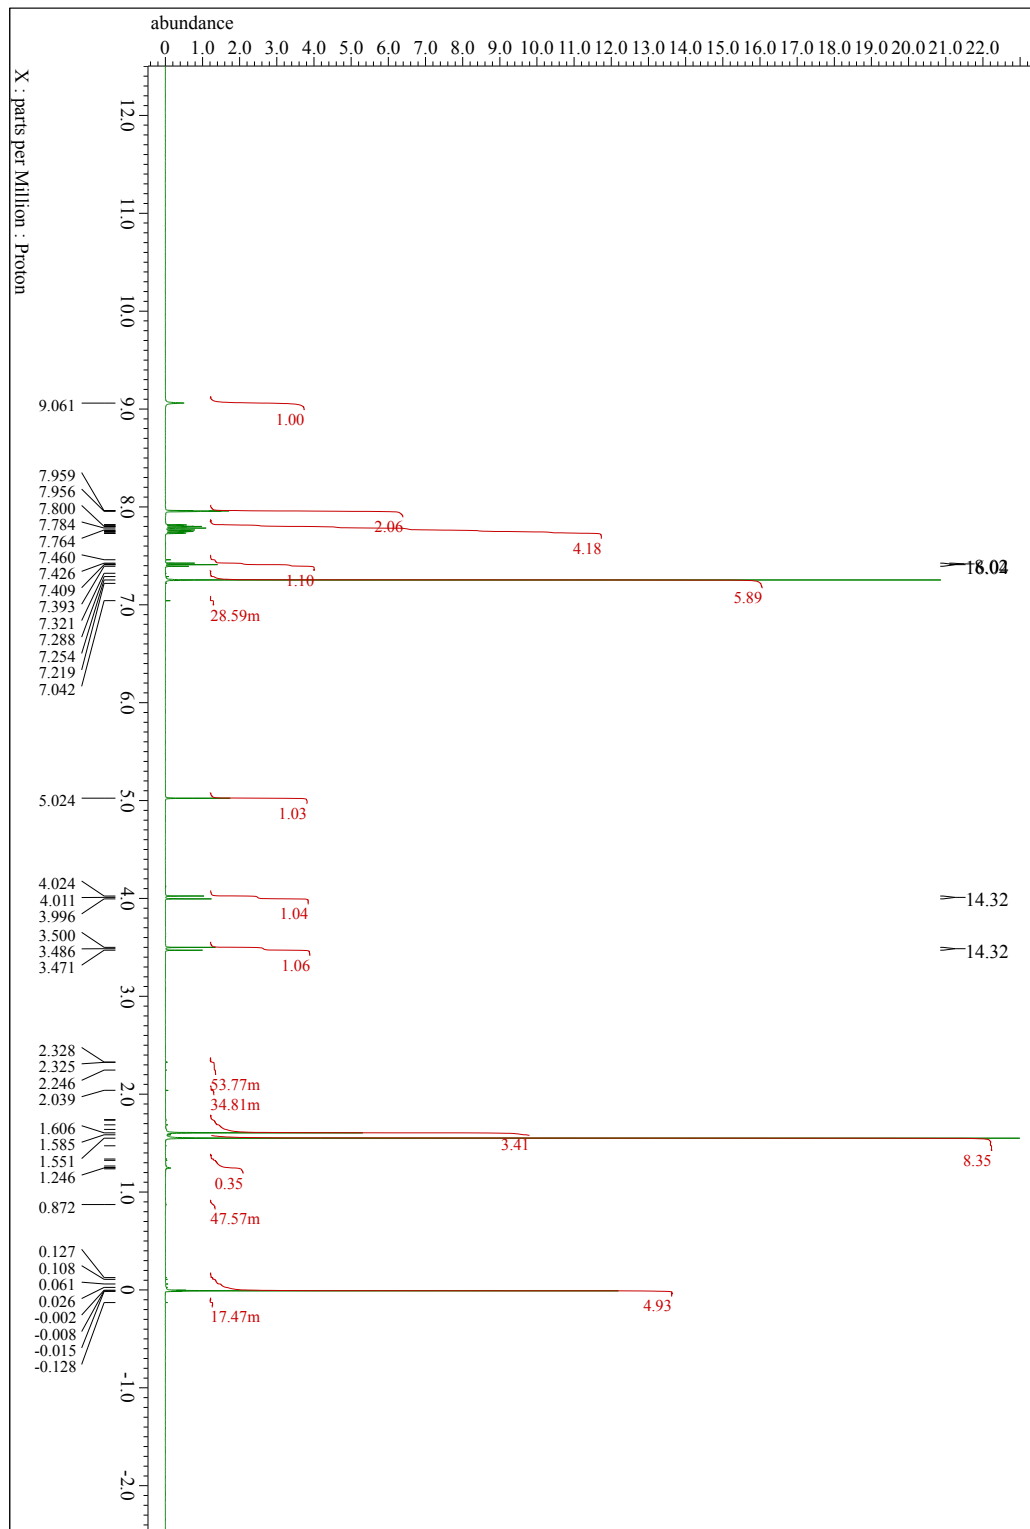

14c

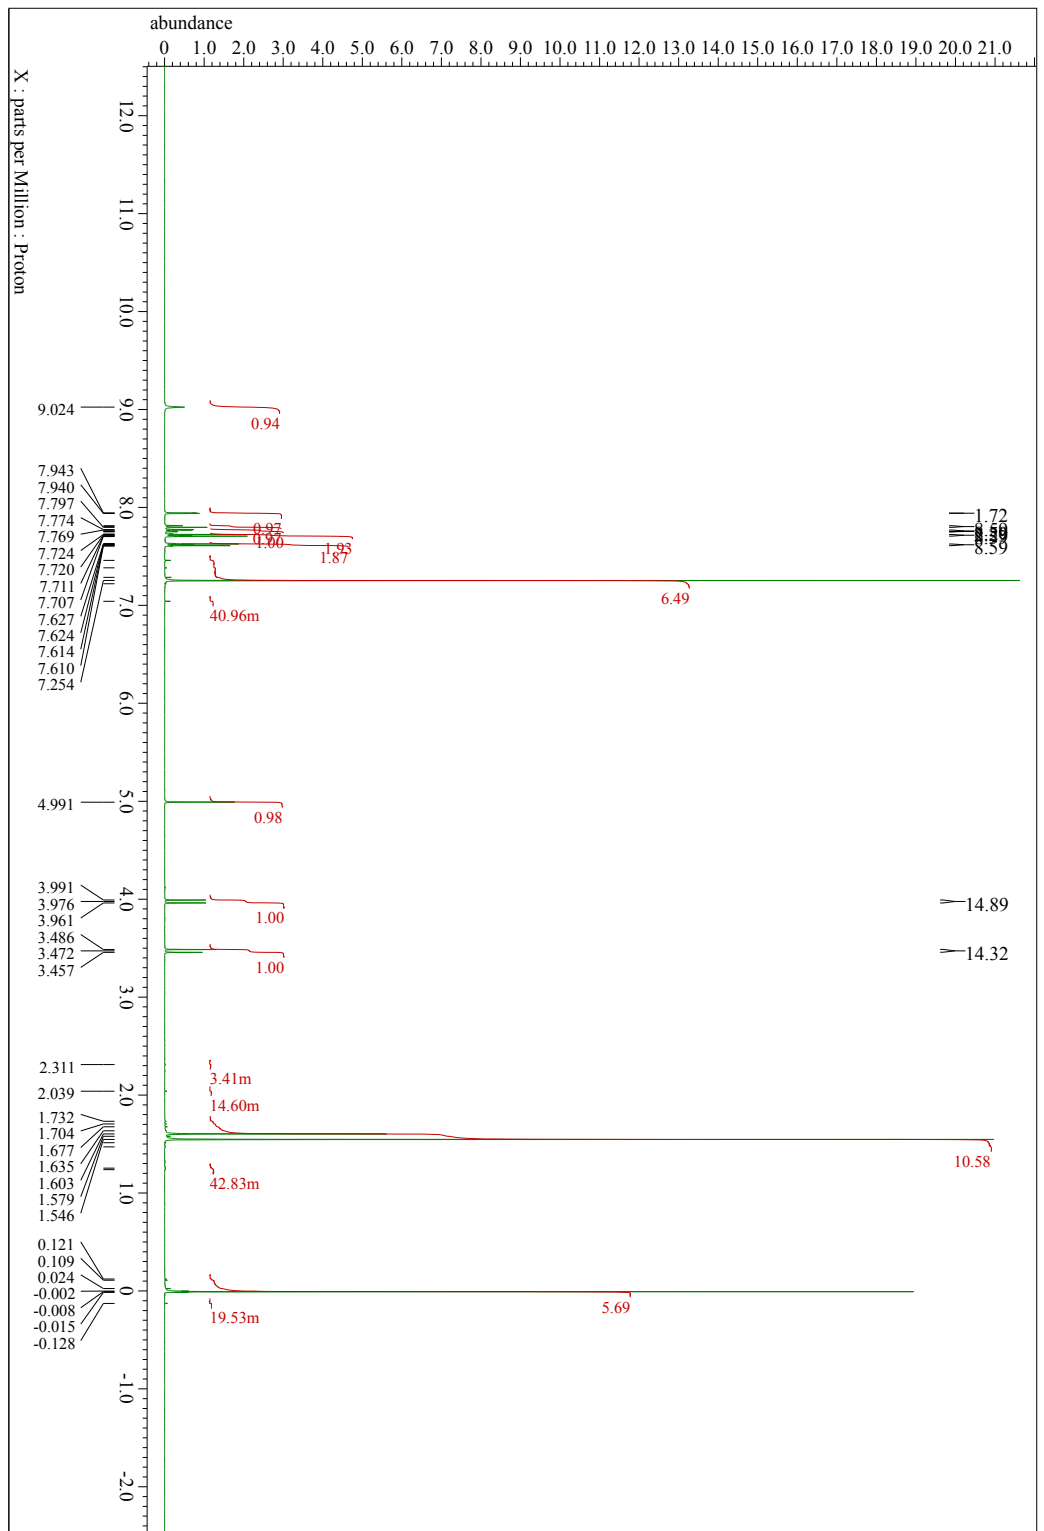

15a



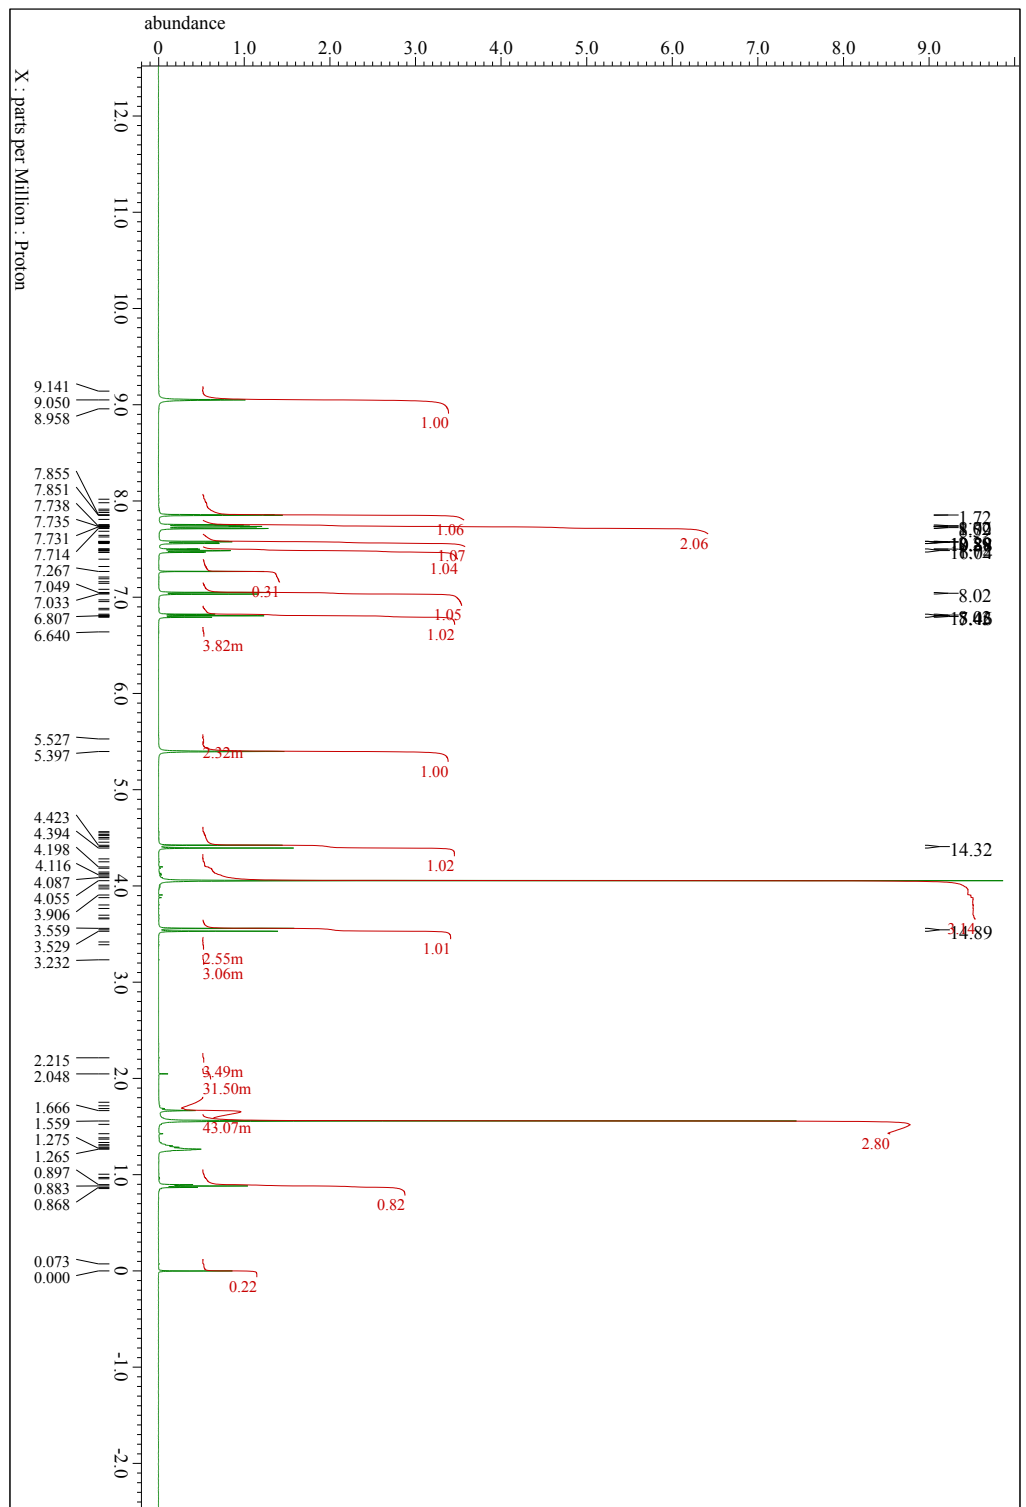

15b

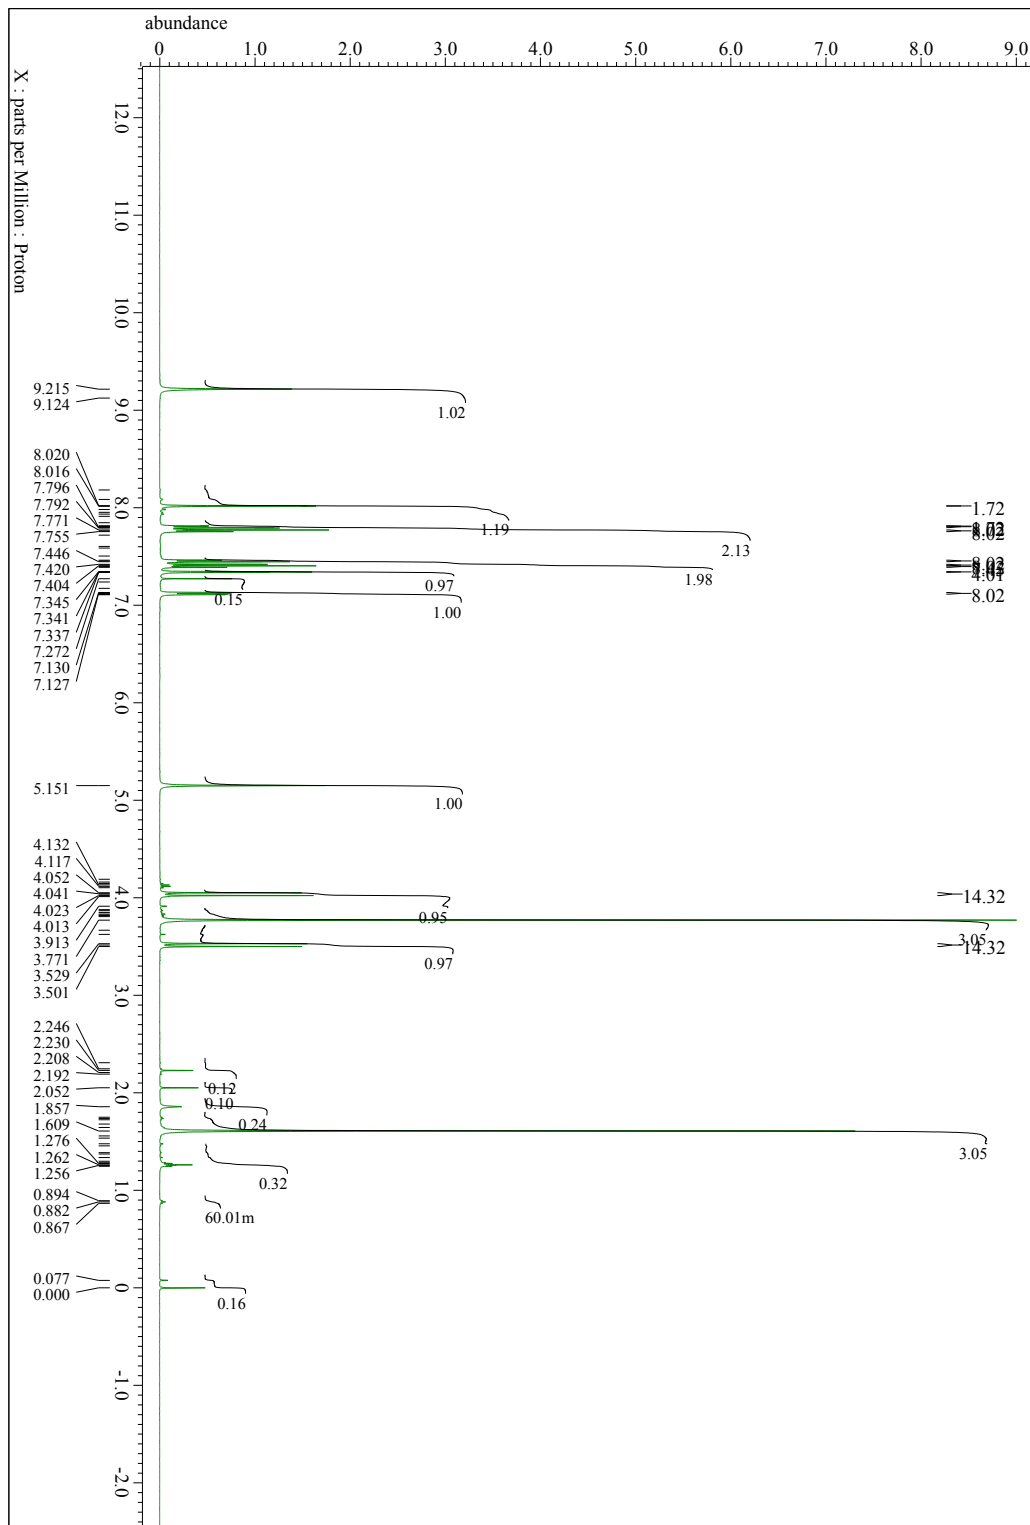

15c

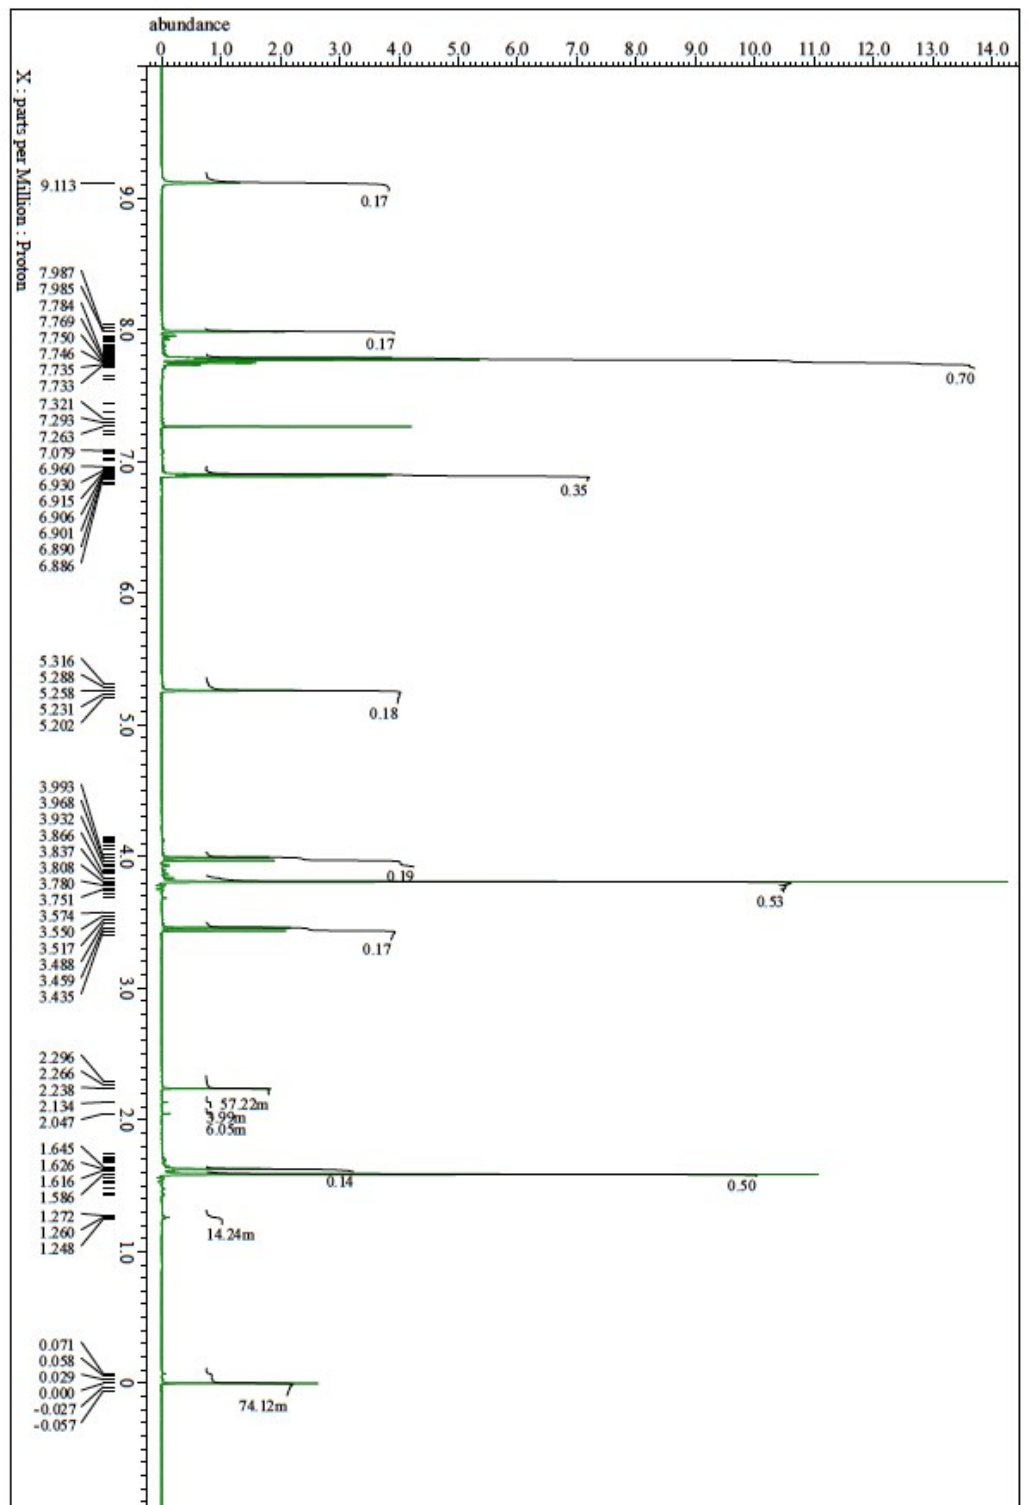

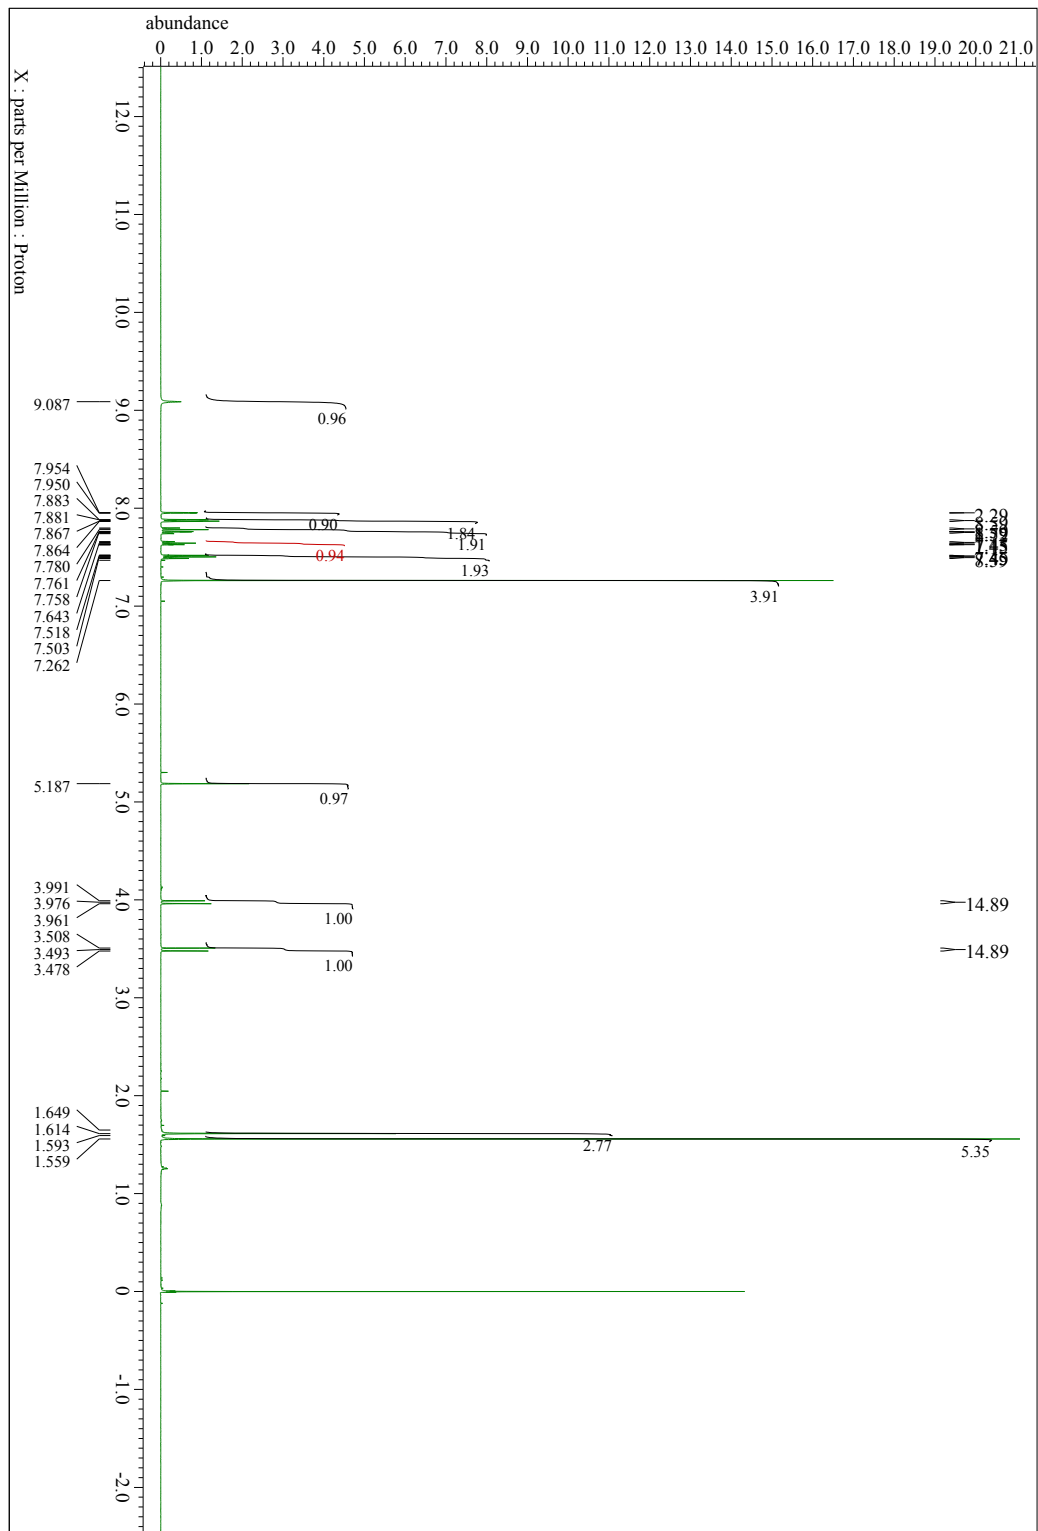

<sup>13</sup>C NMR spectra

10a

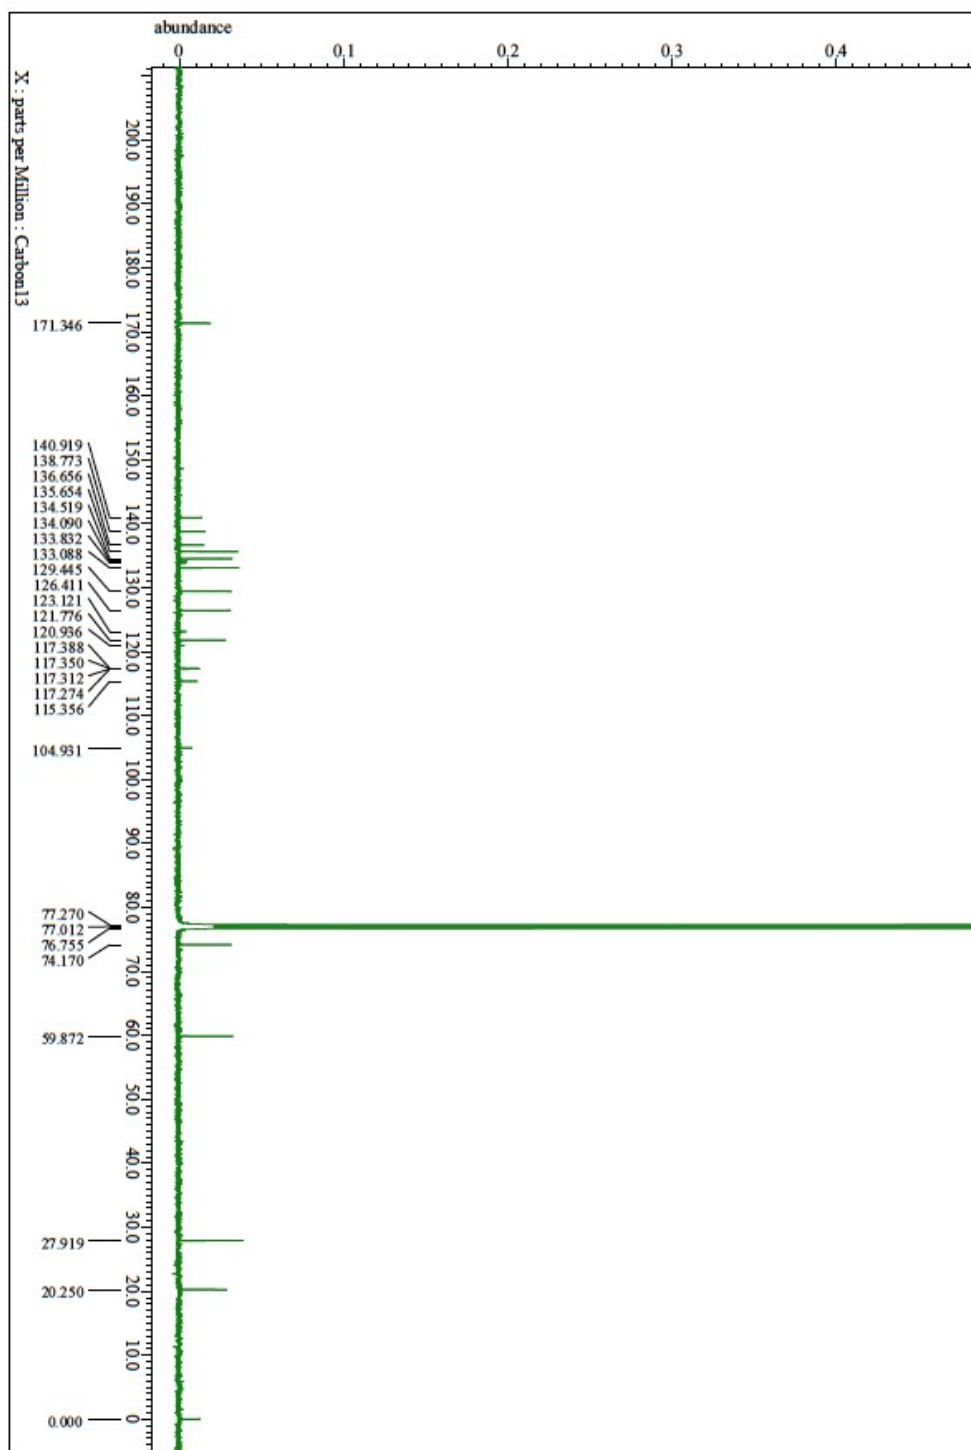

10b

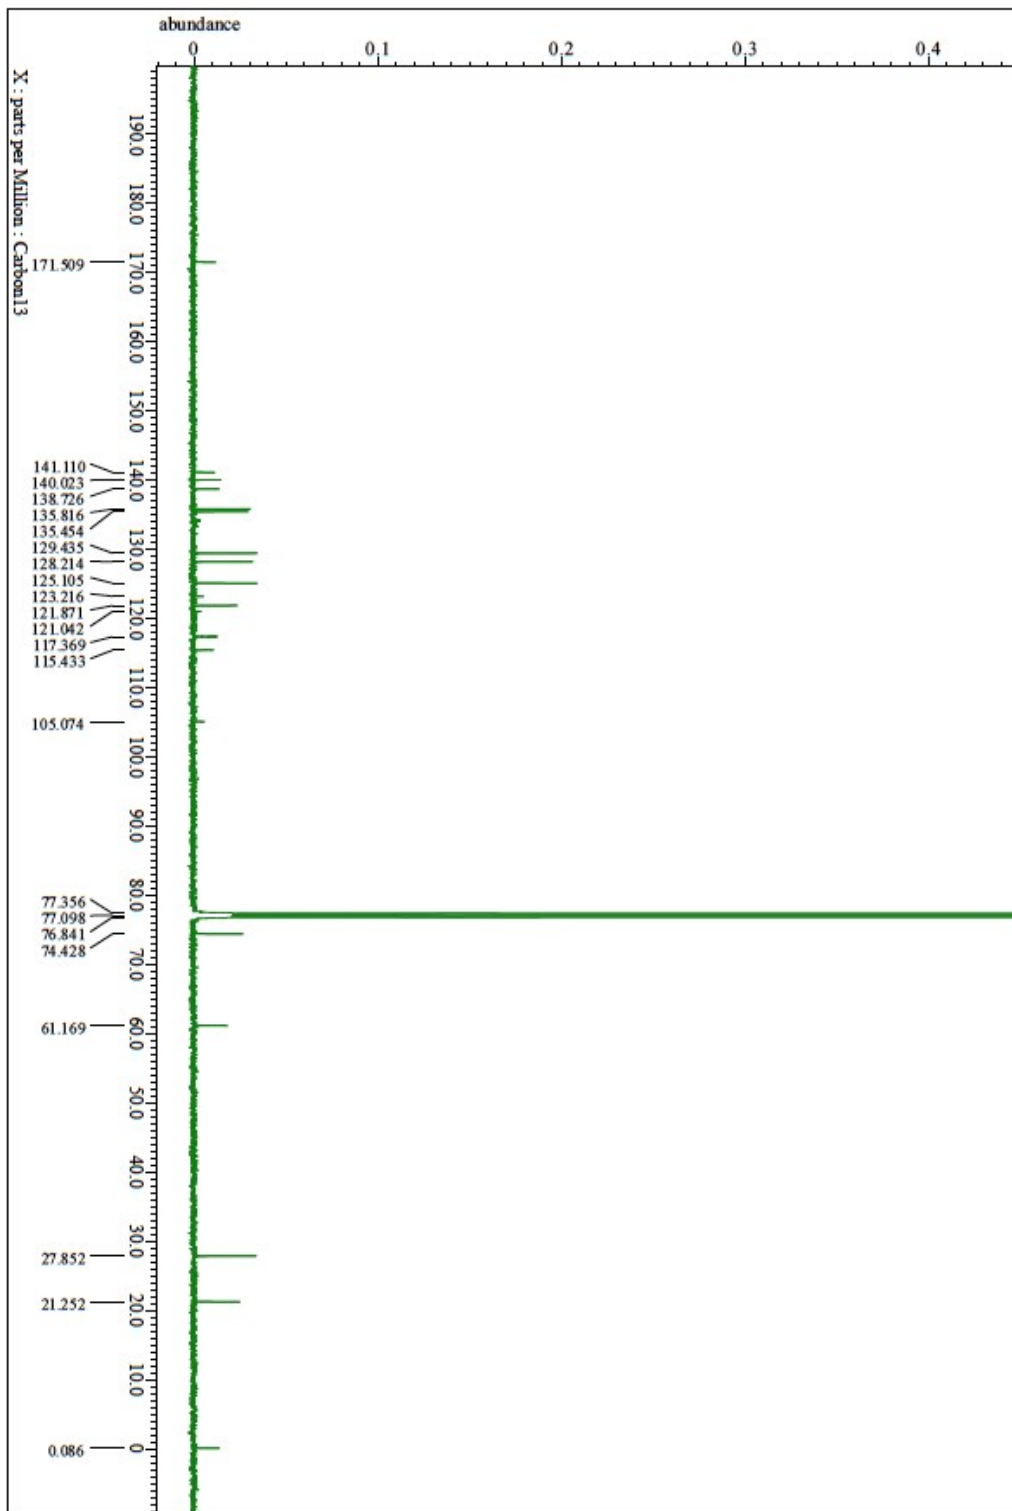

10c

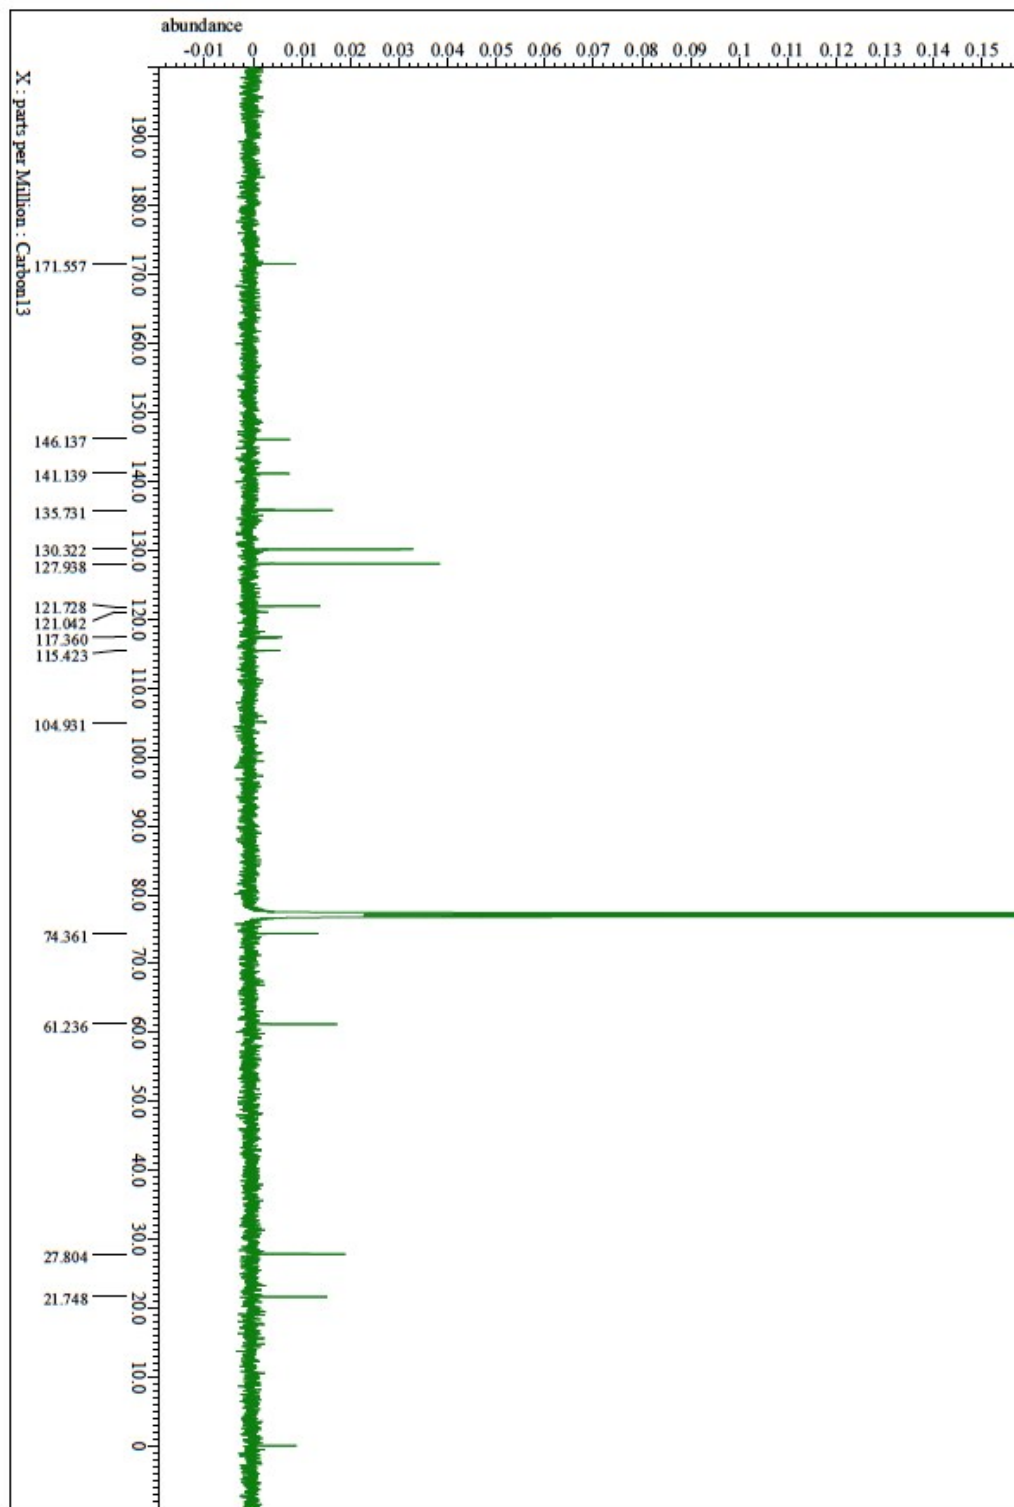

11a

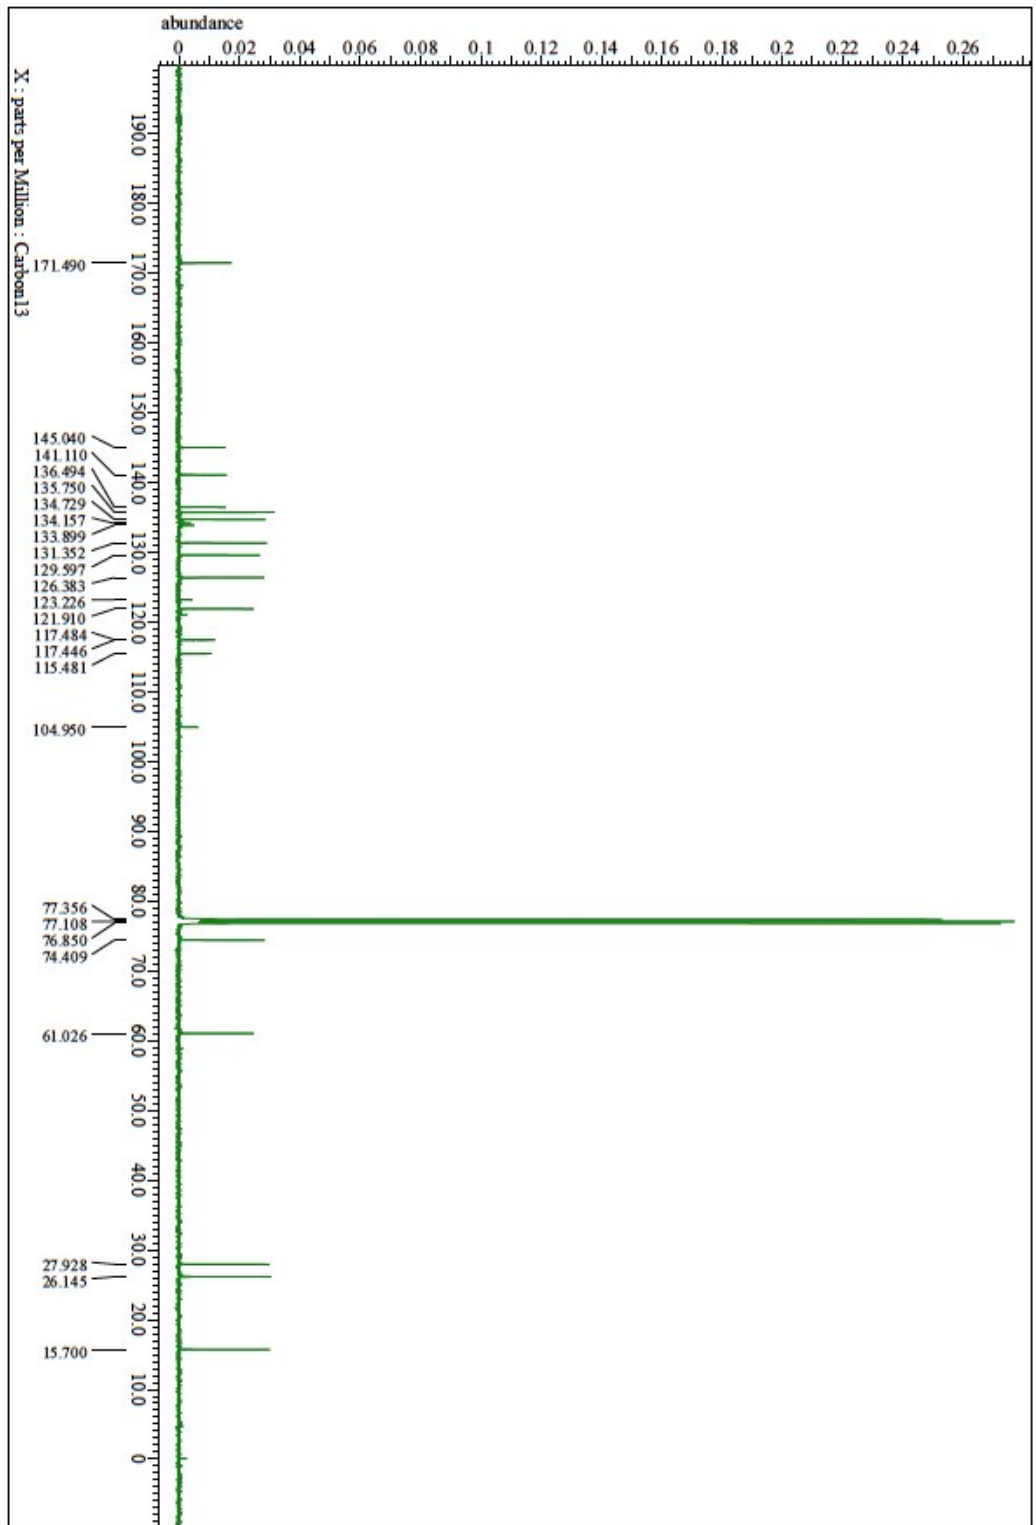

11b



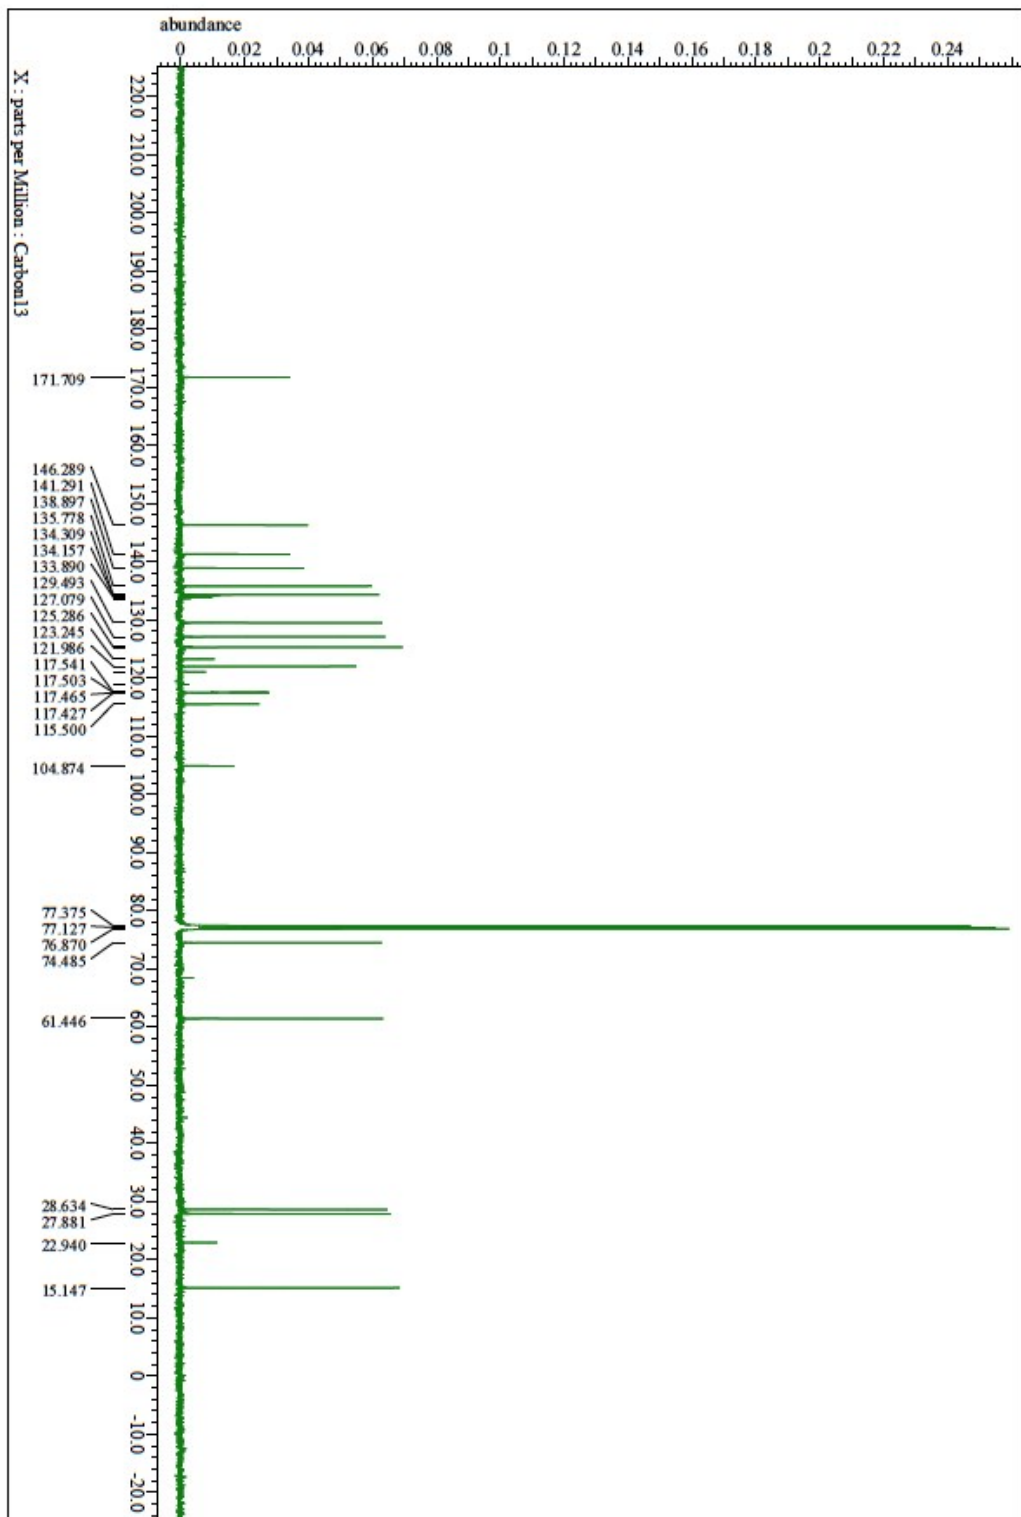

11c

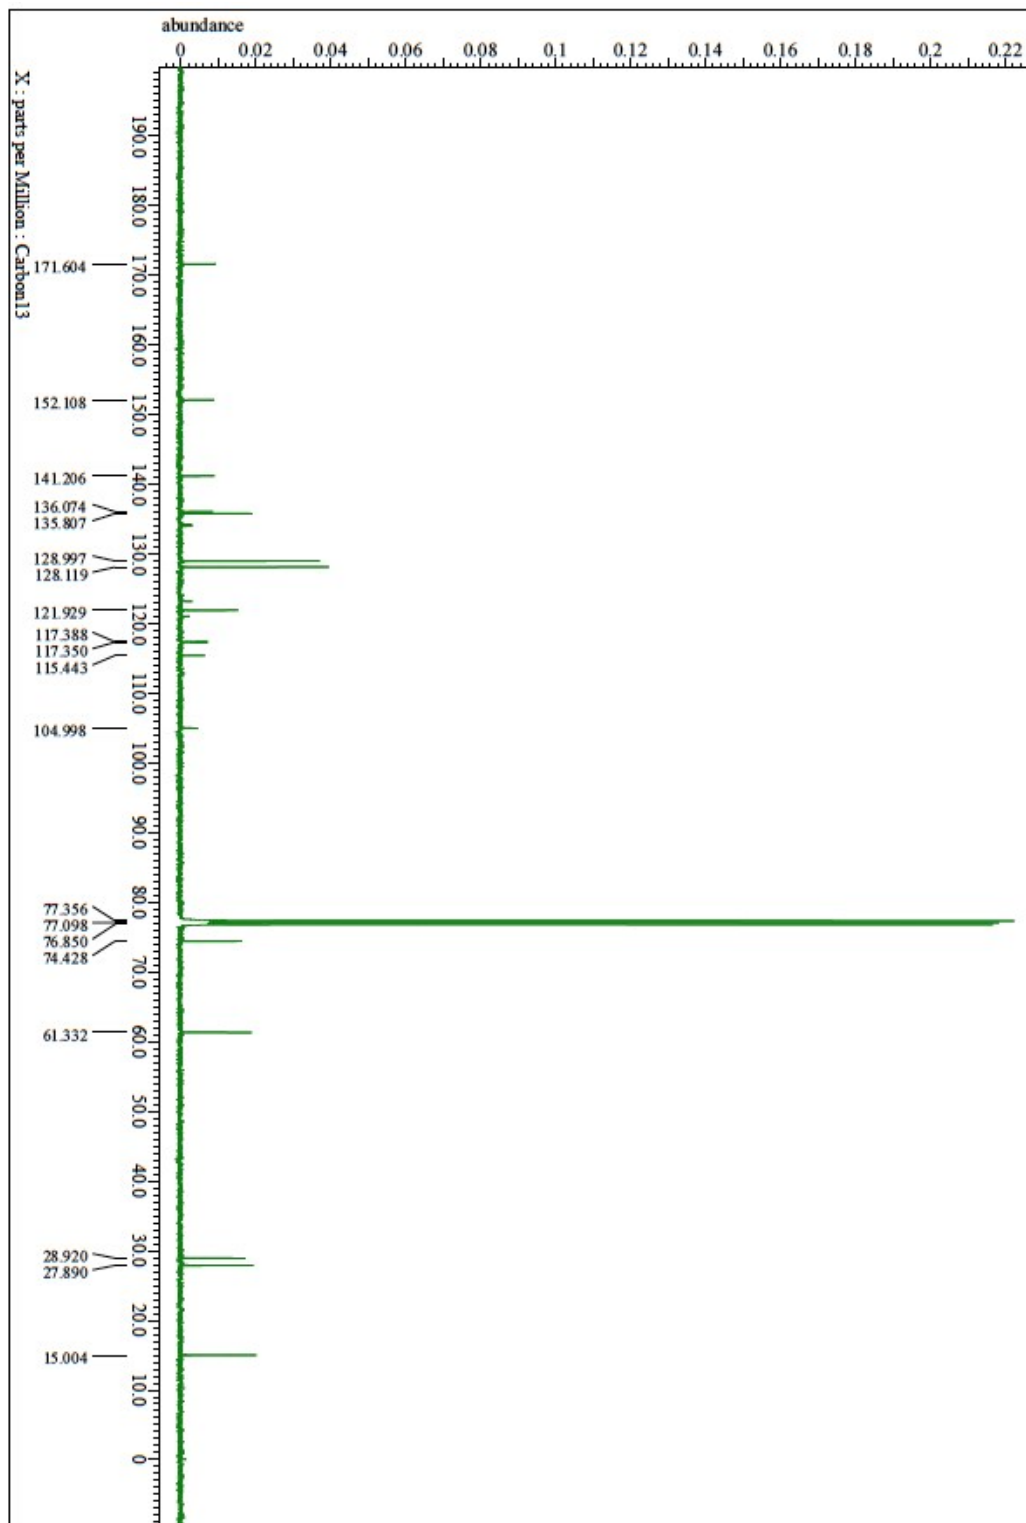

12a

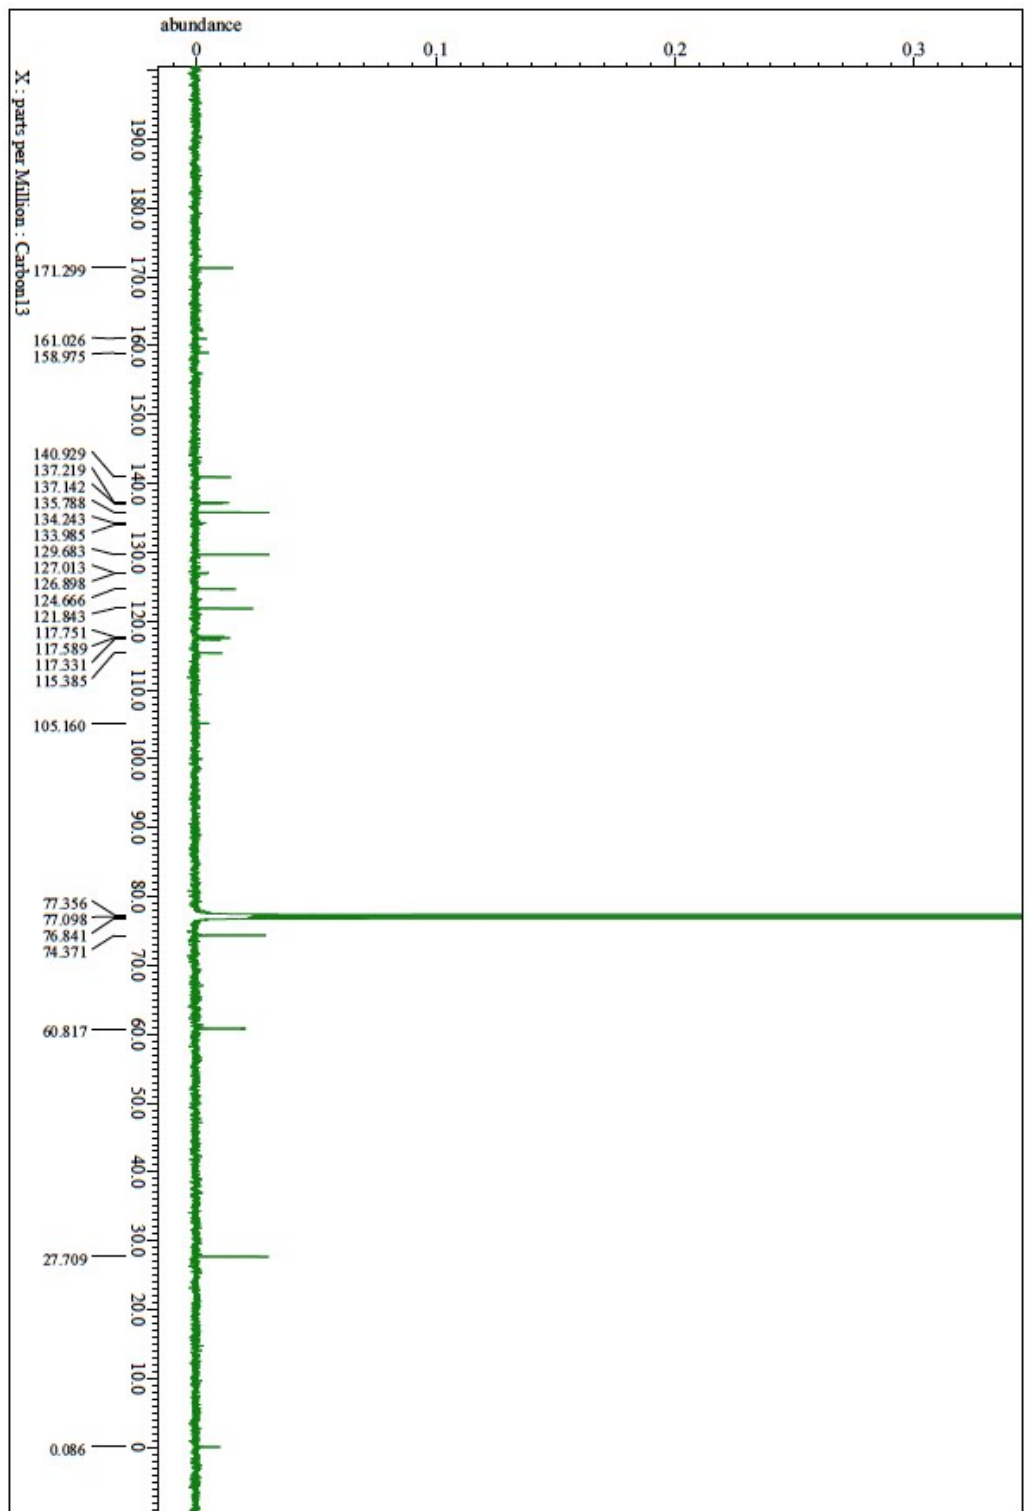

12b

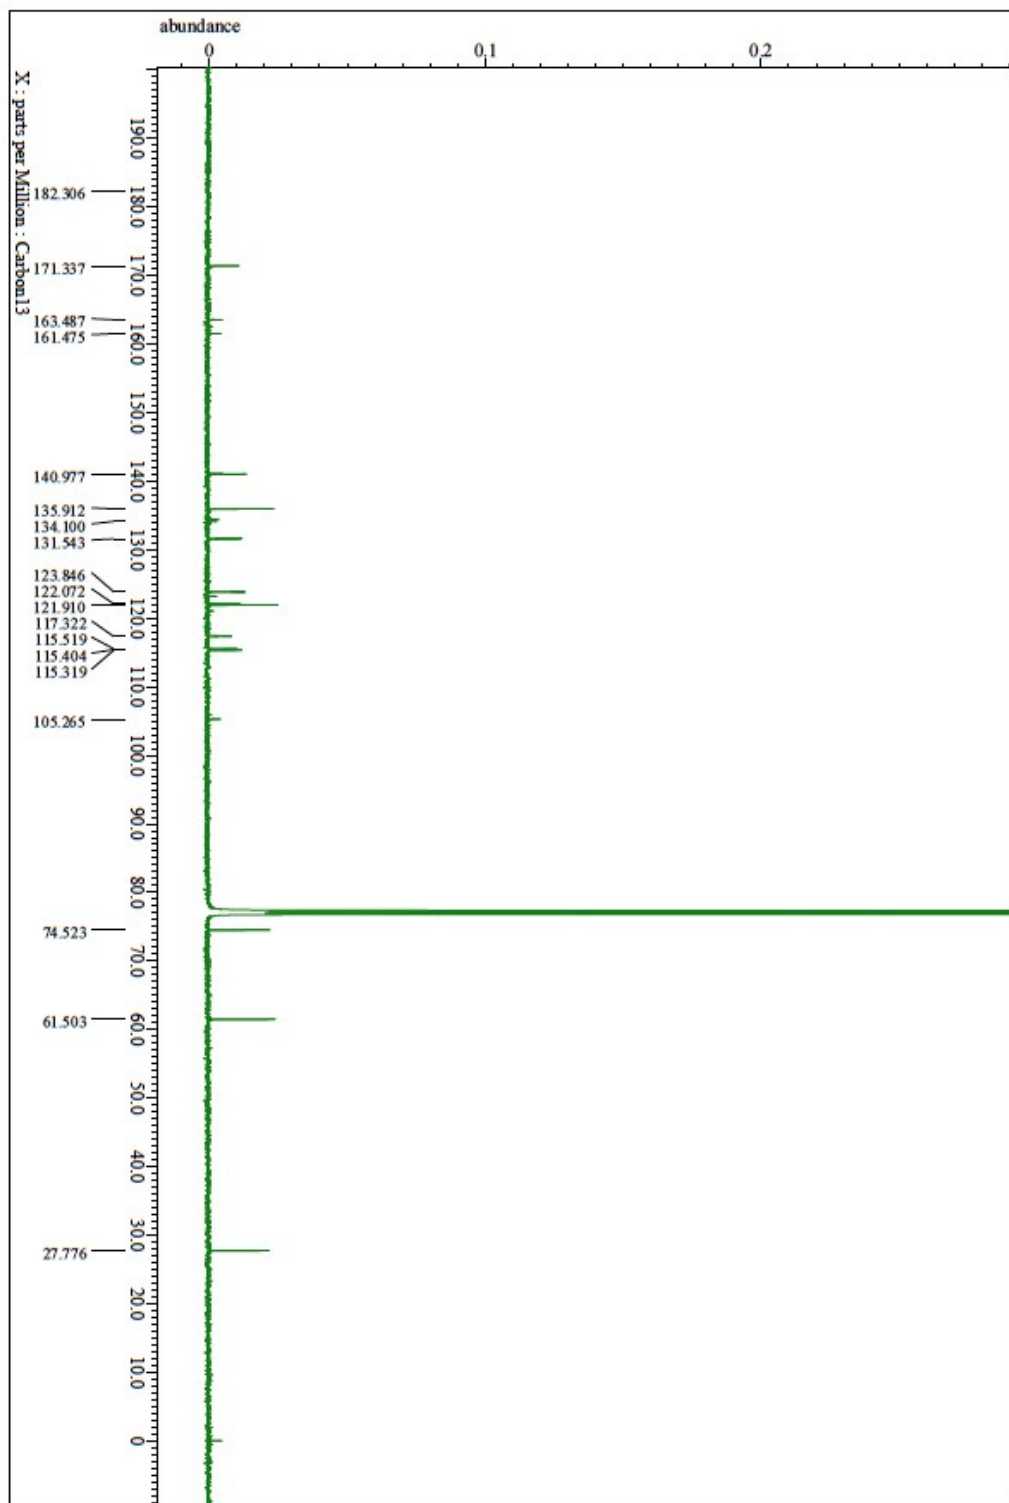

12c

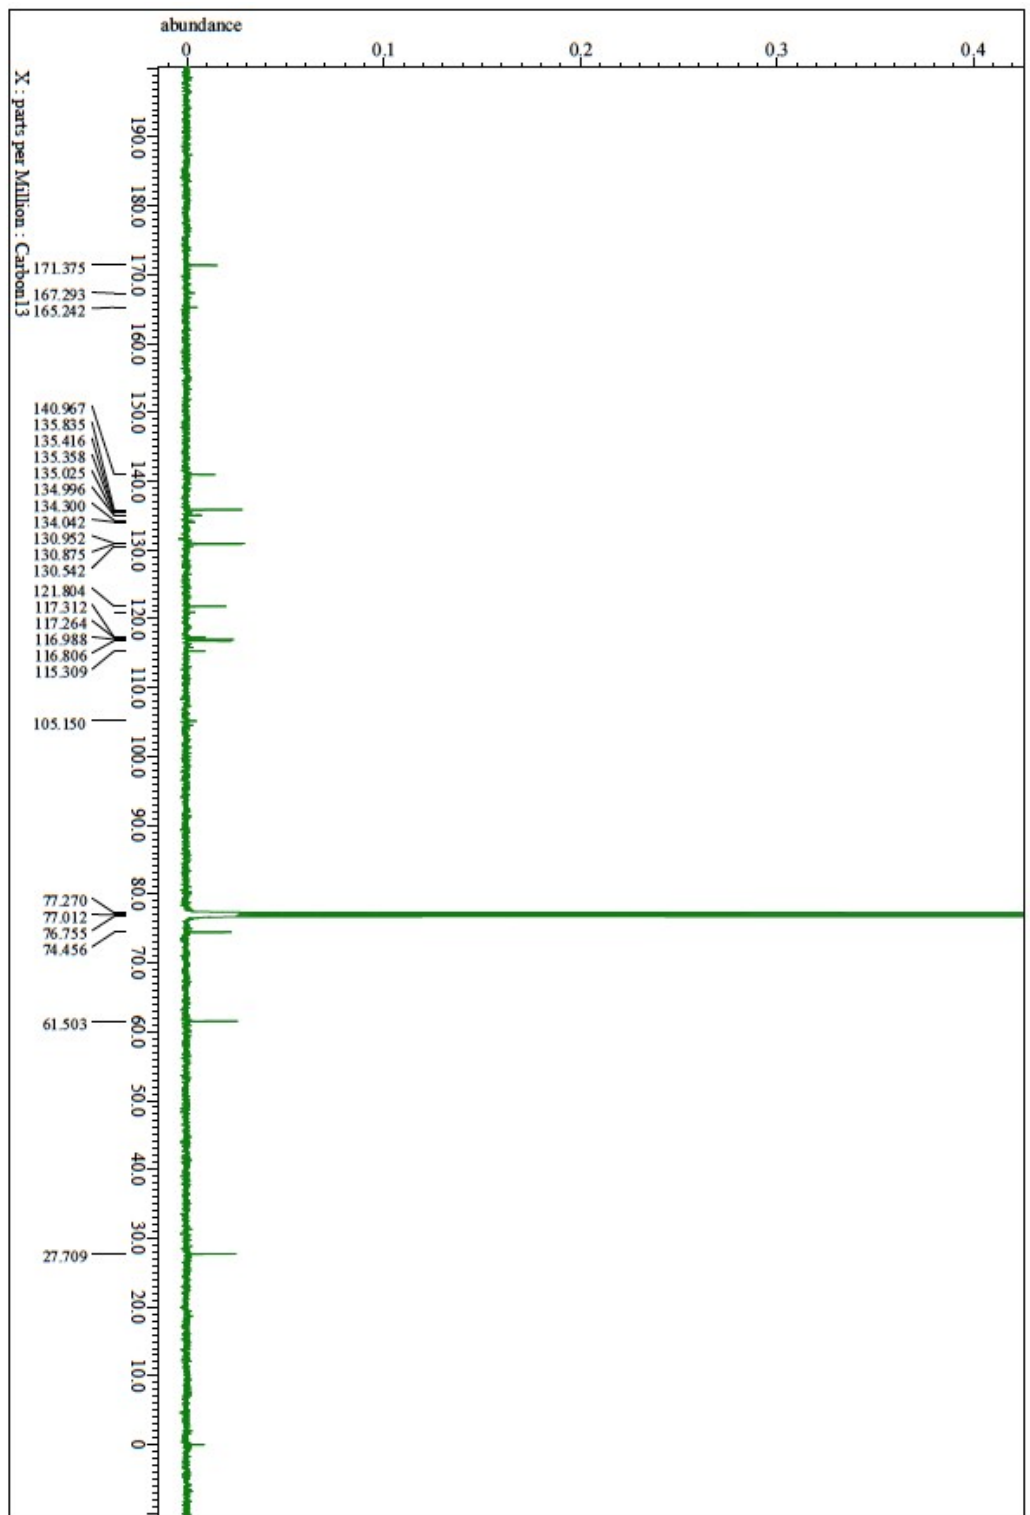

13a

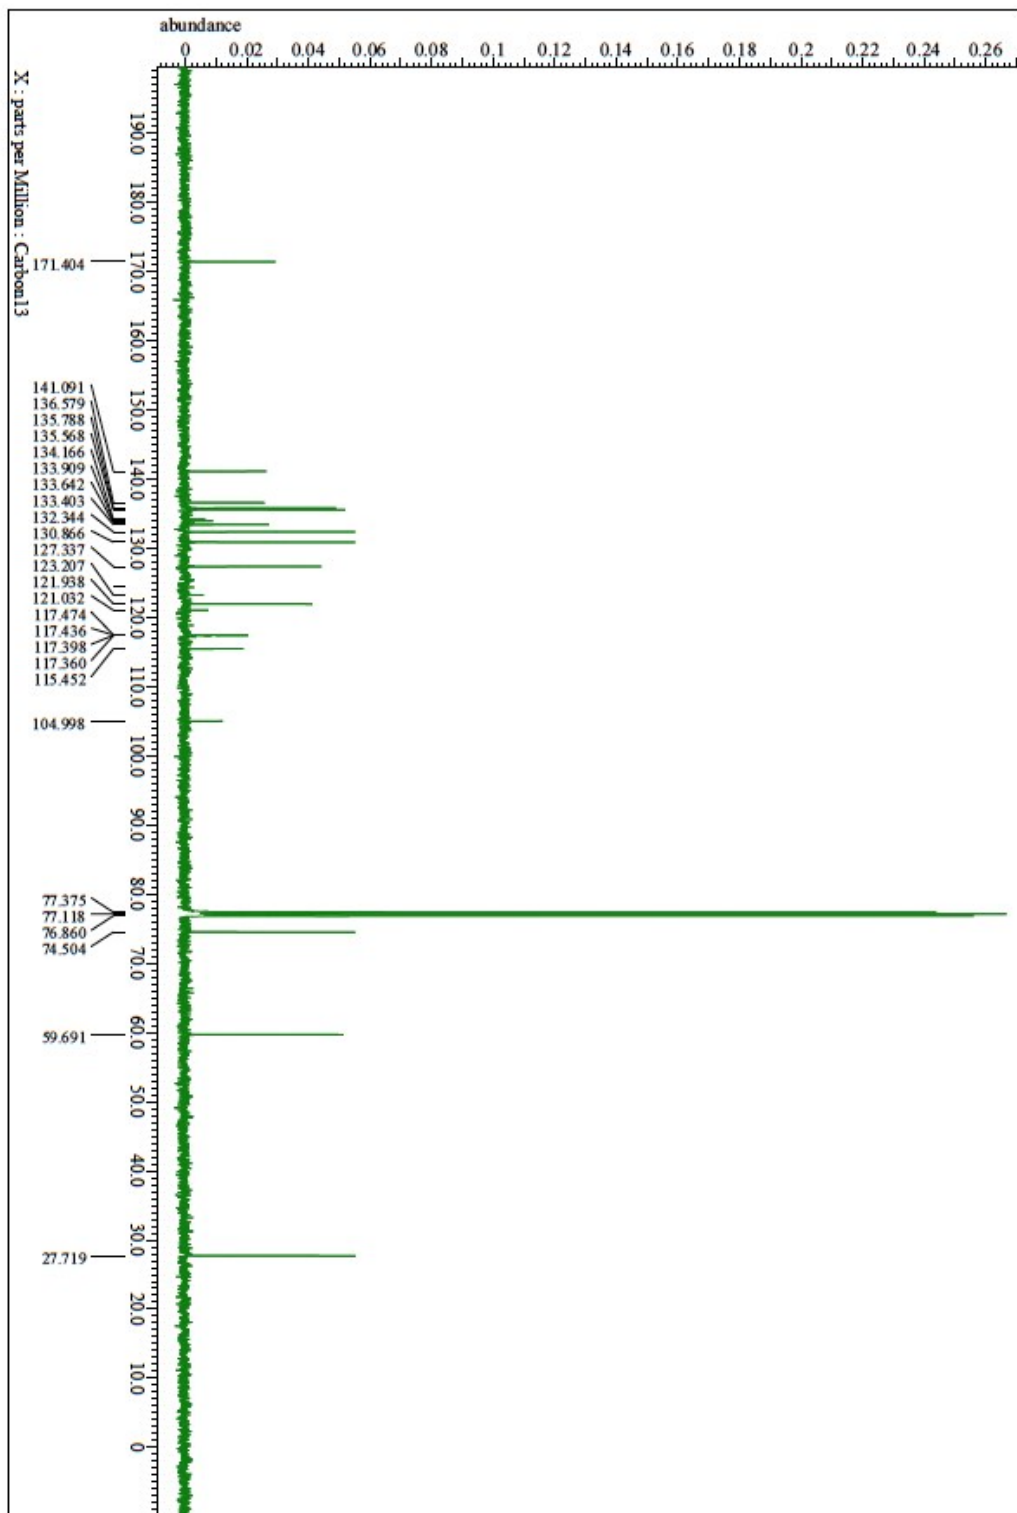

13b

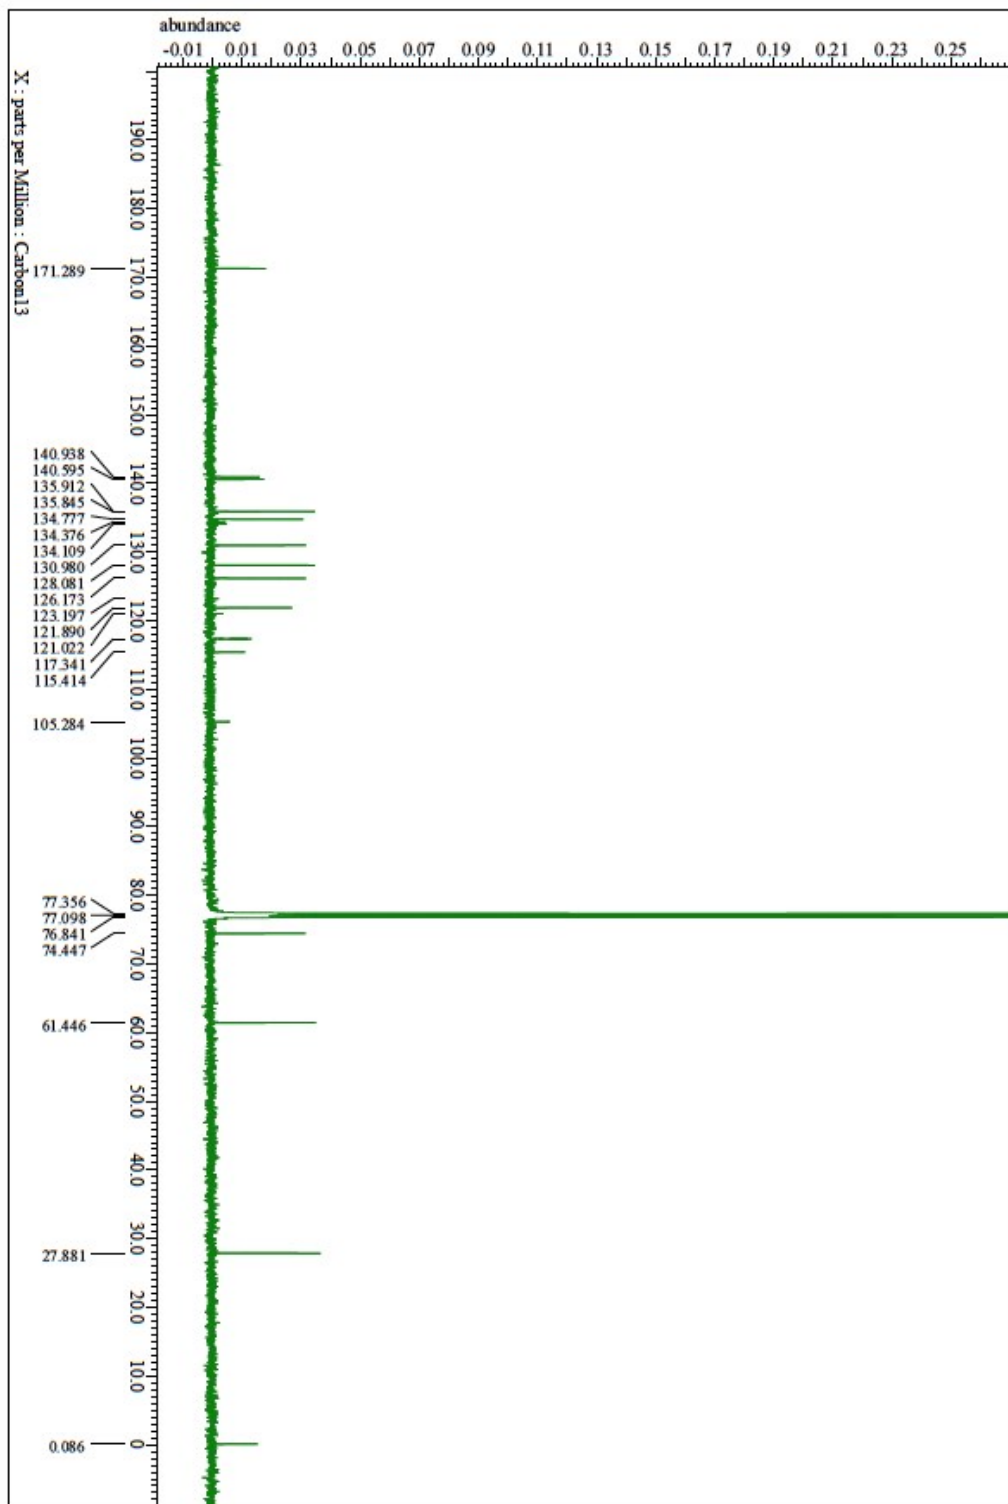

13c

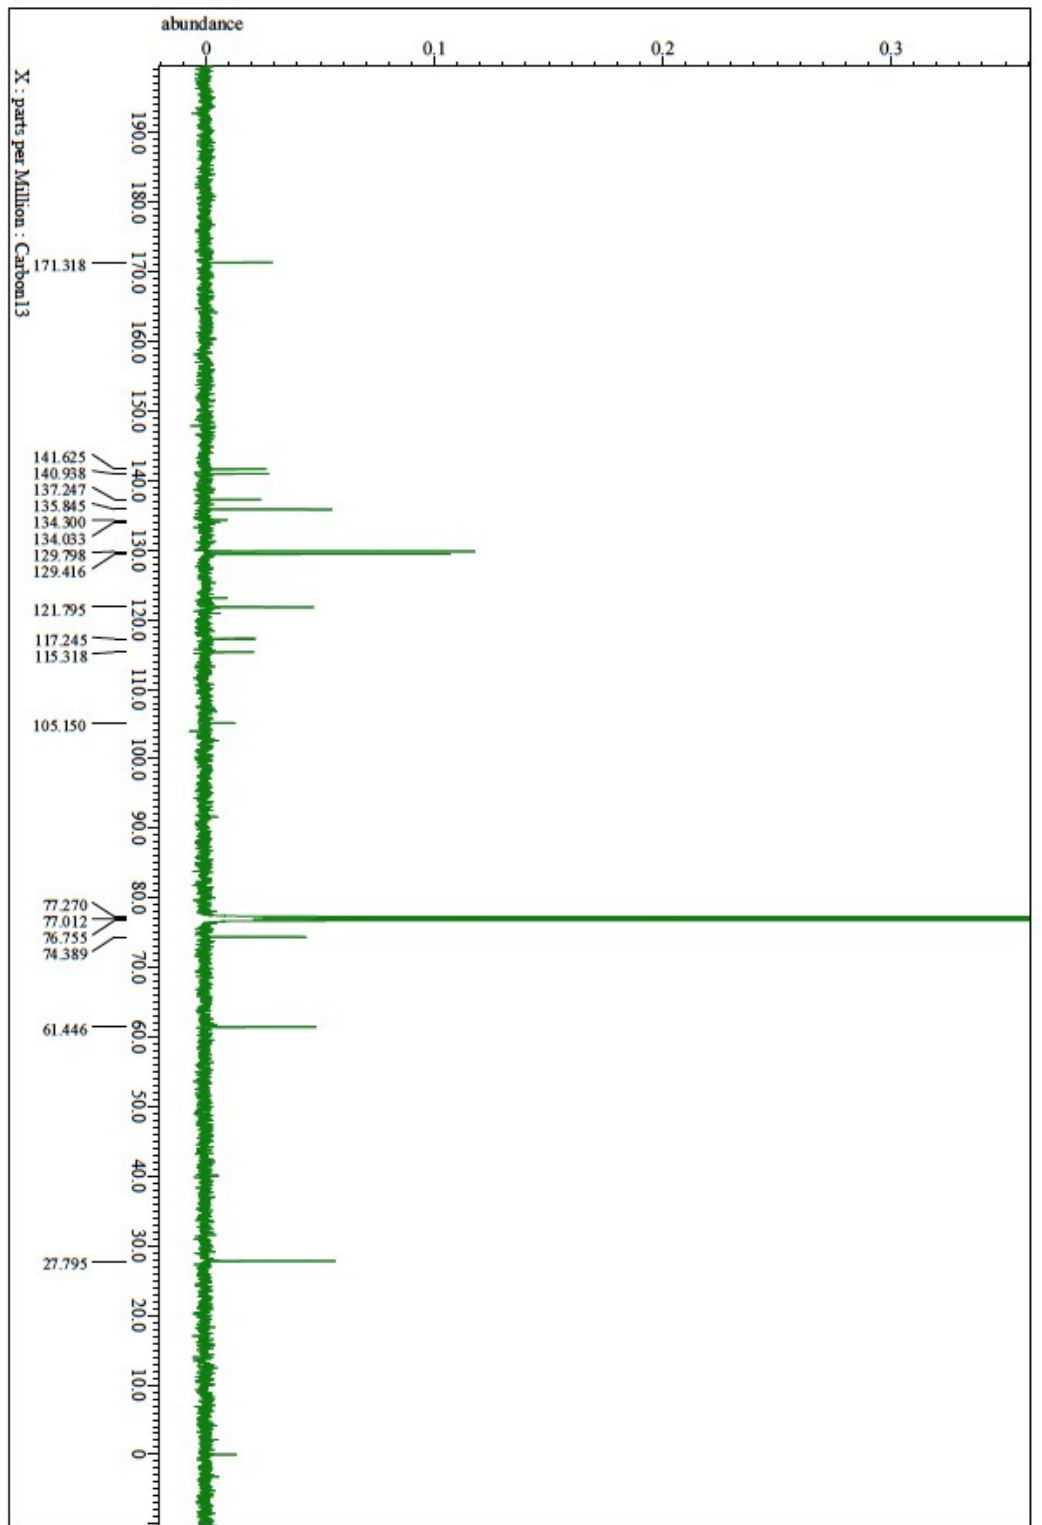

14a



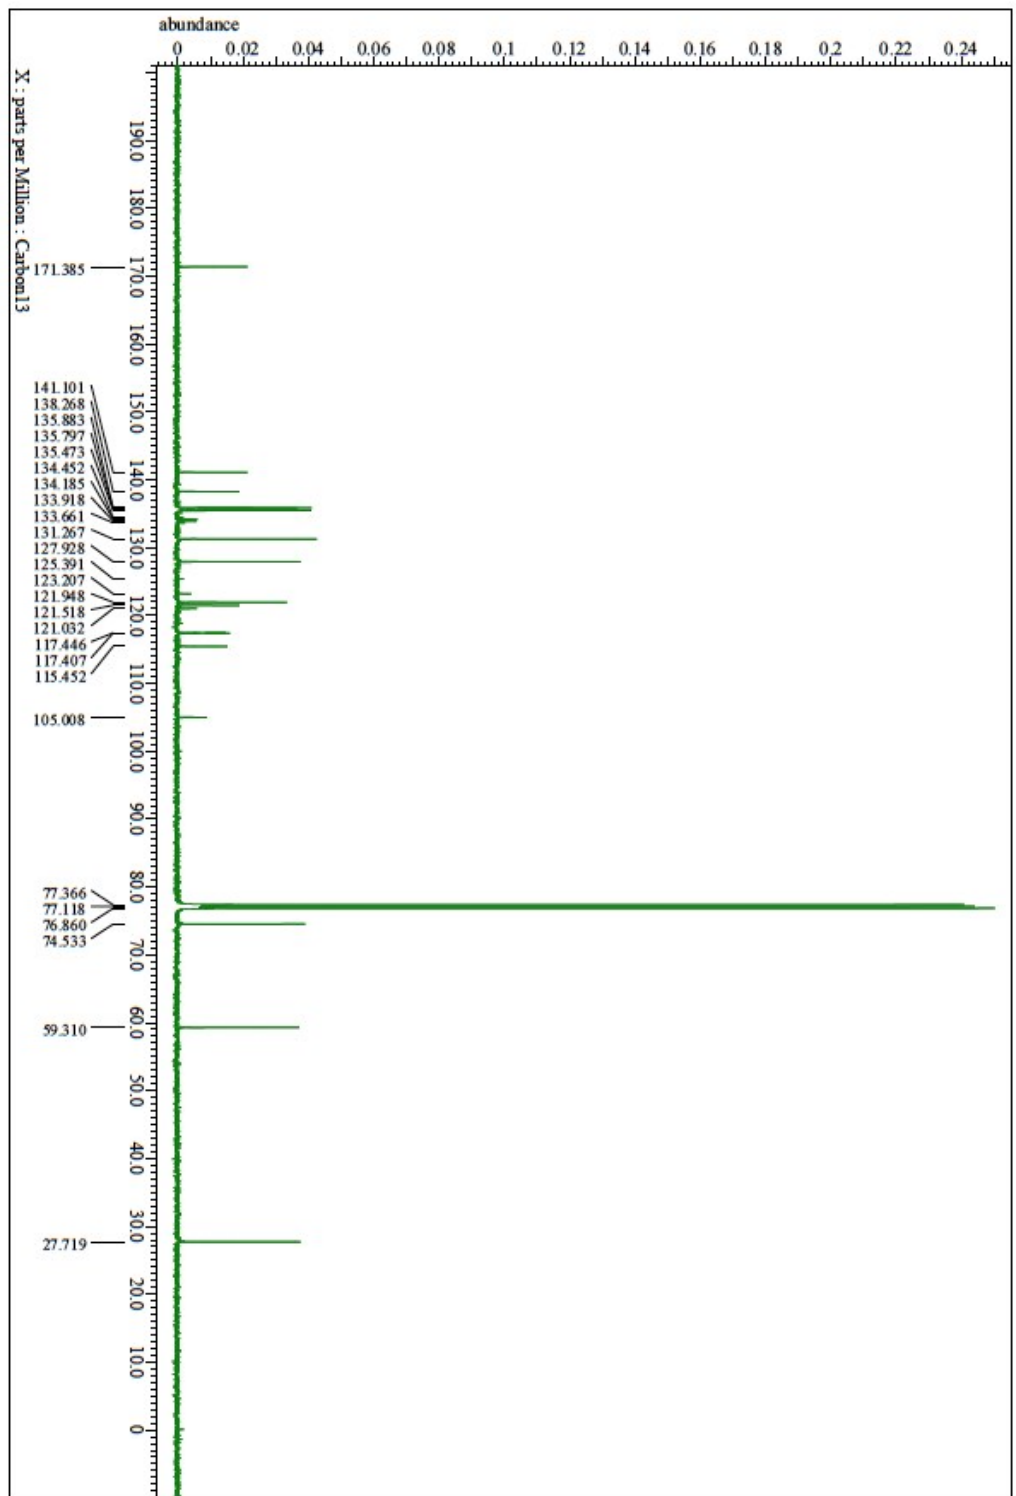

14b

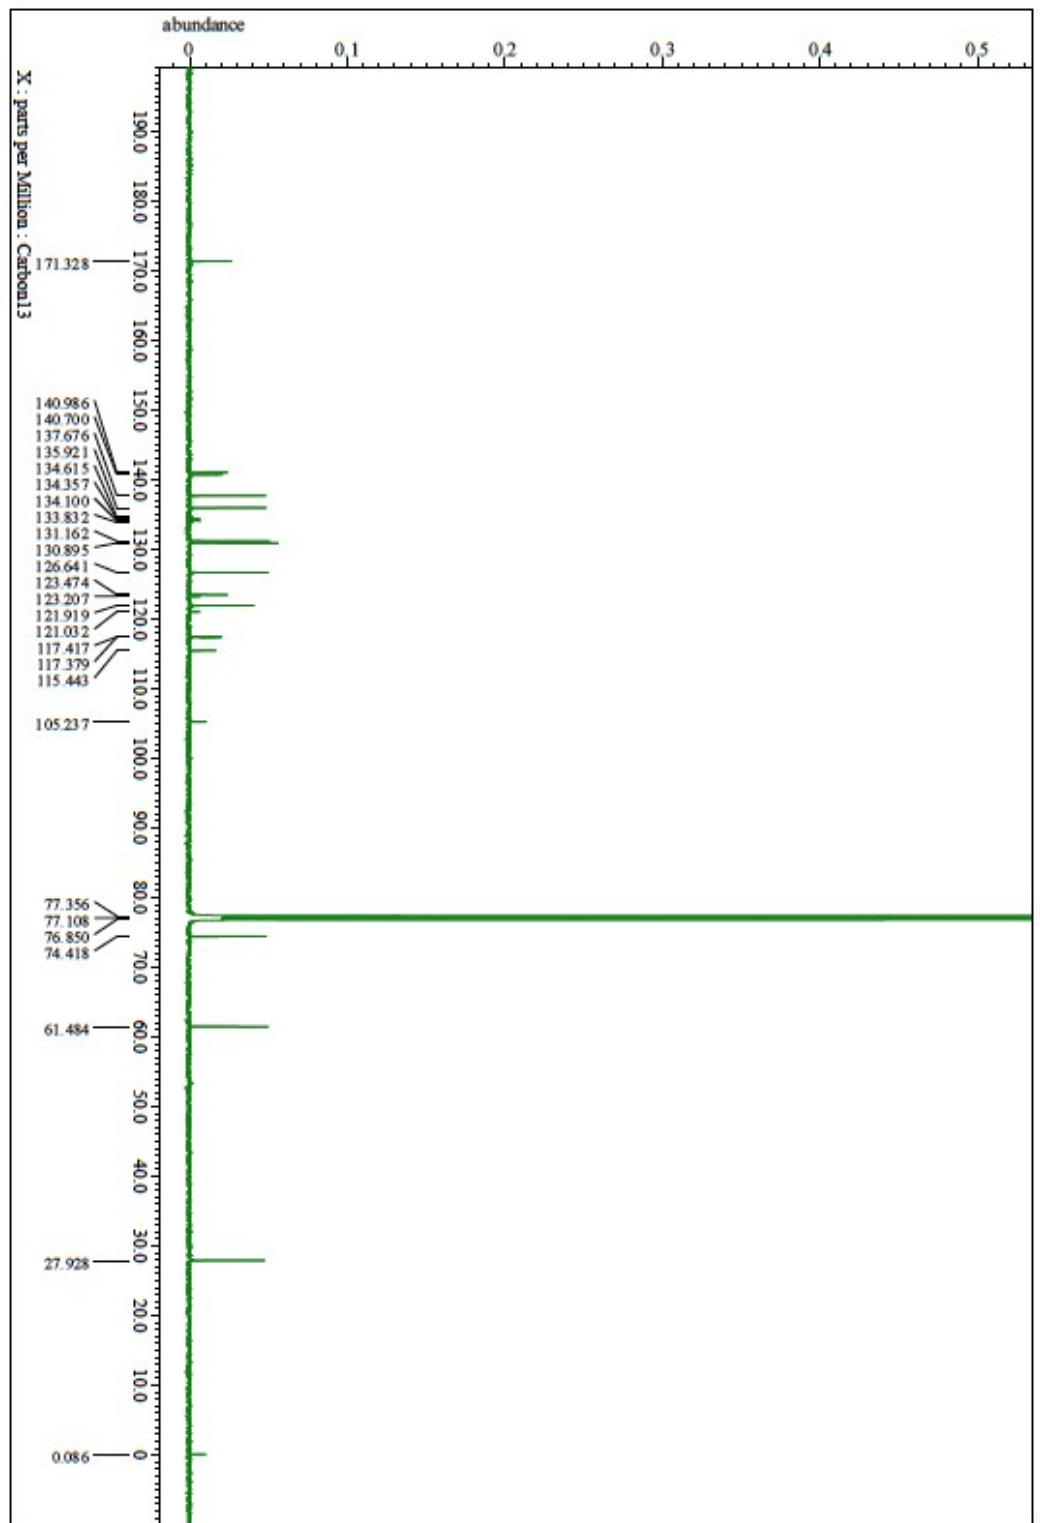

14c

15a

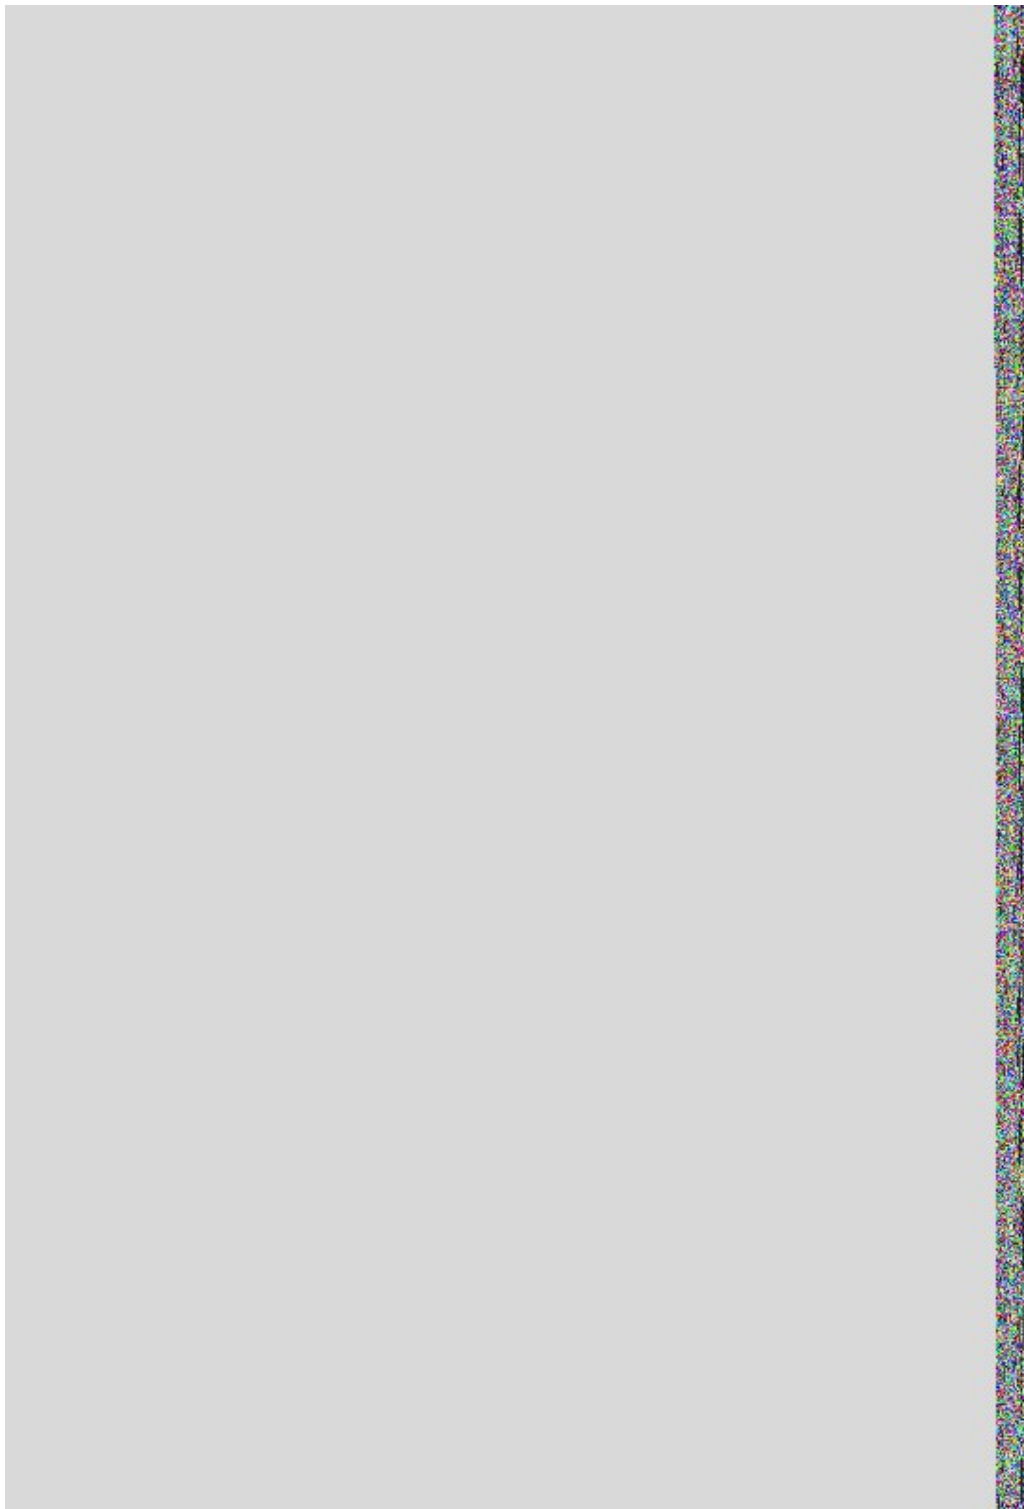

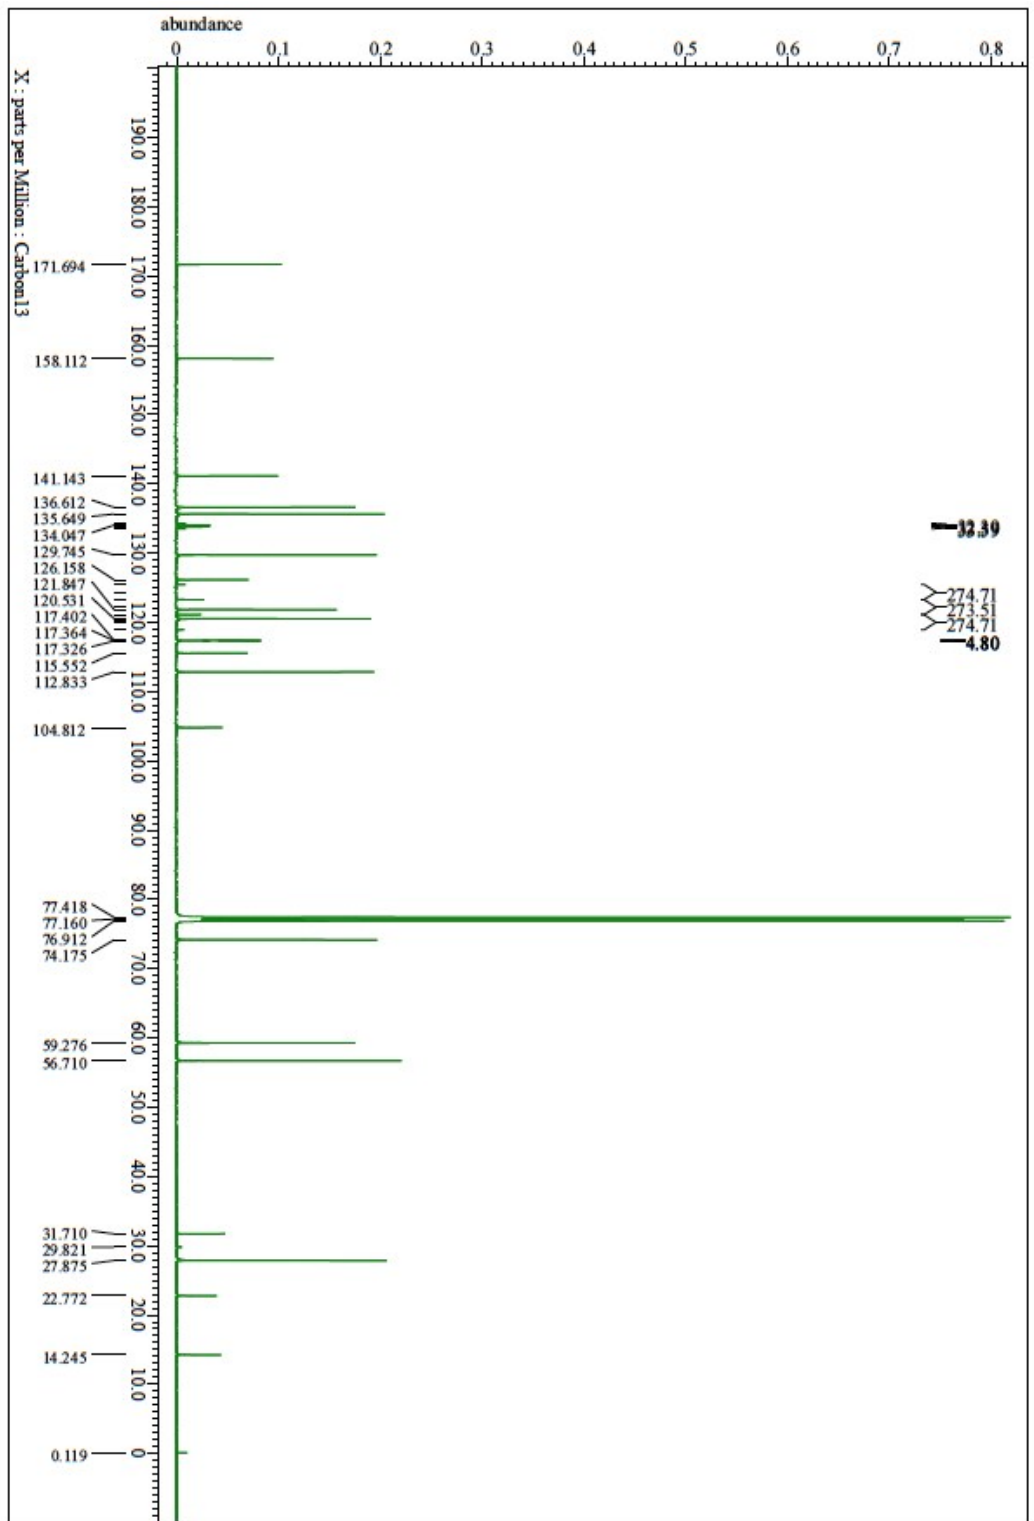

15b

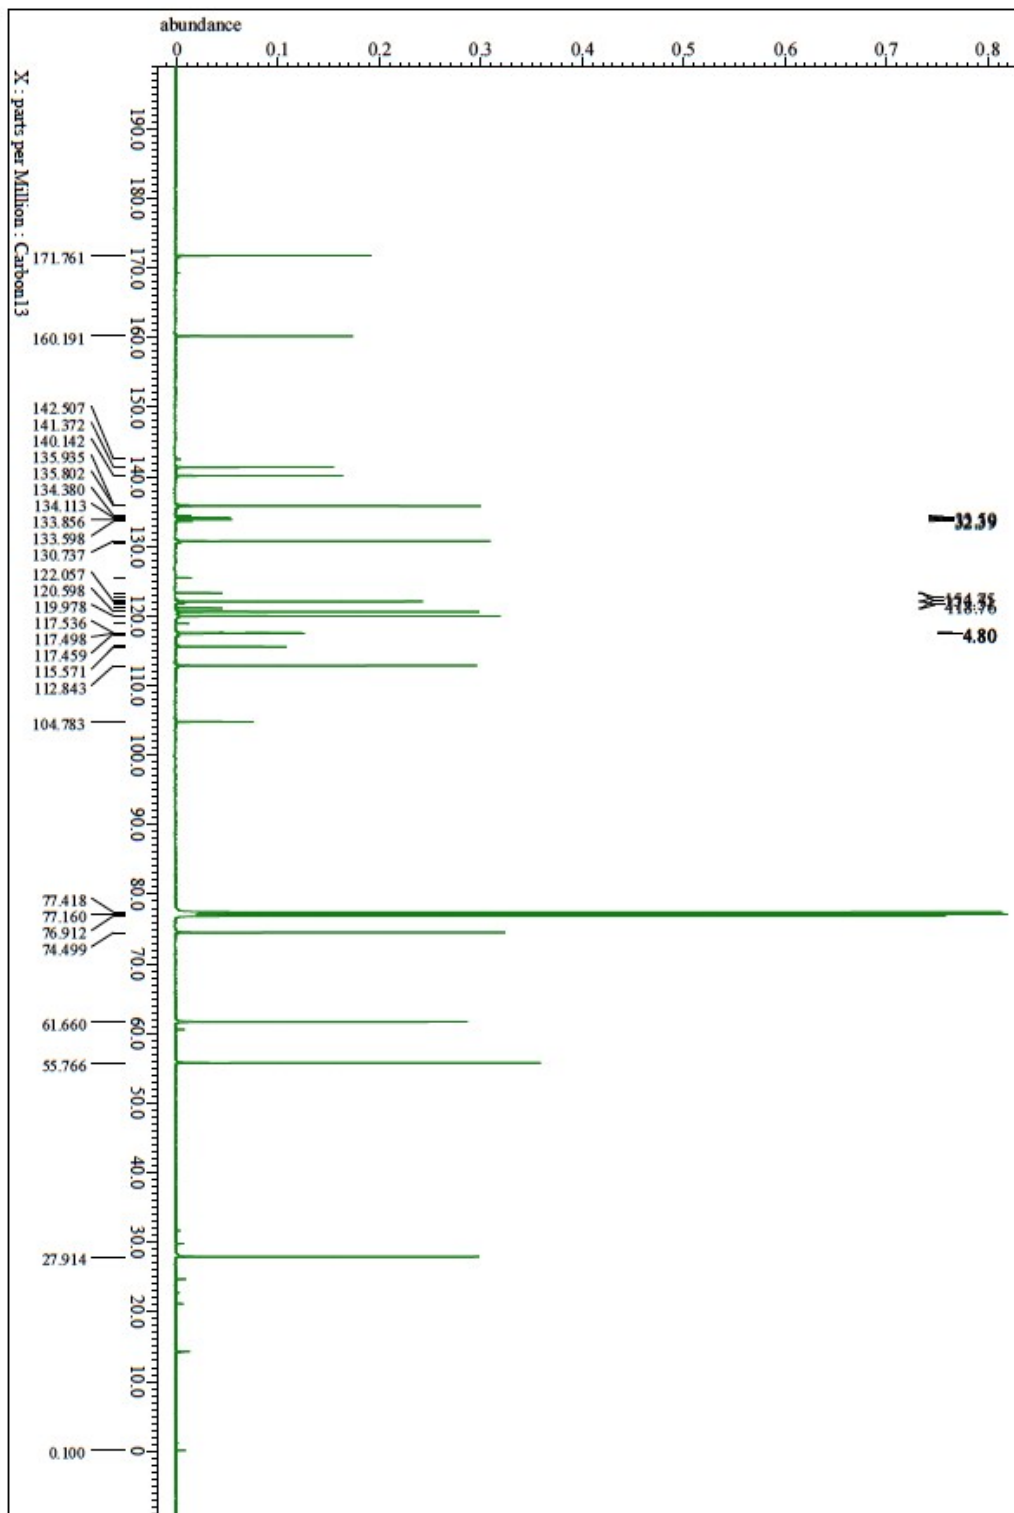

15c

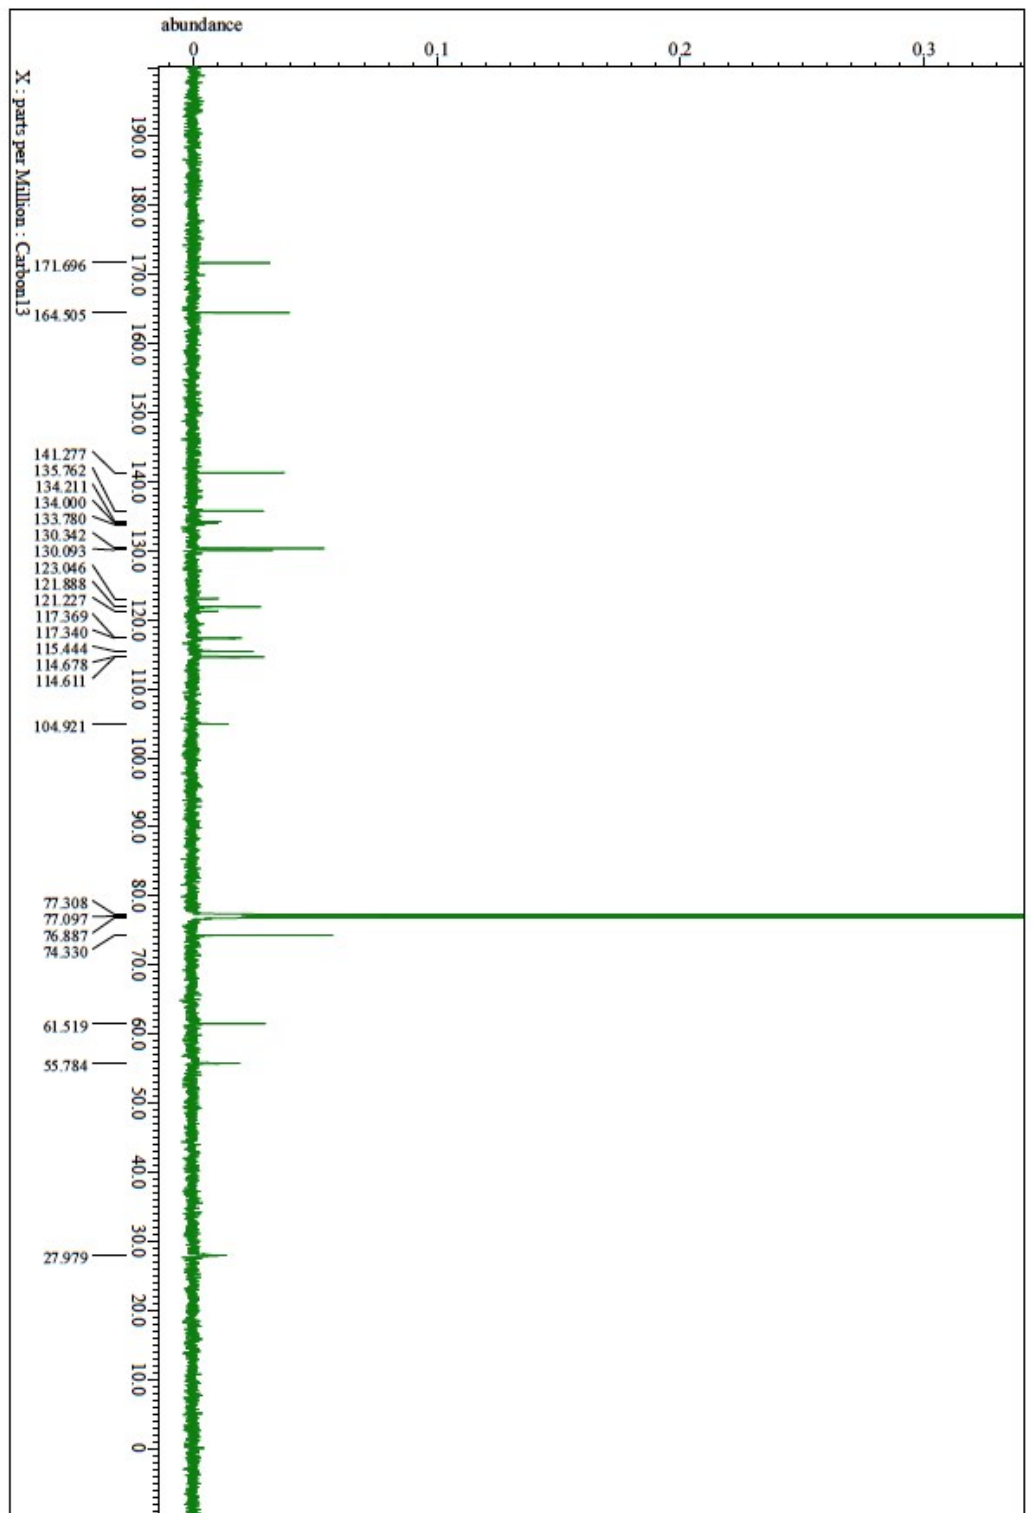

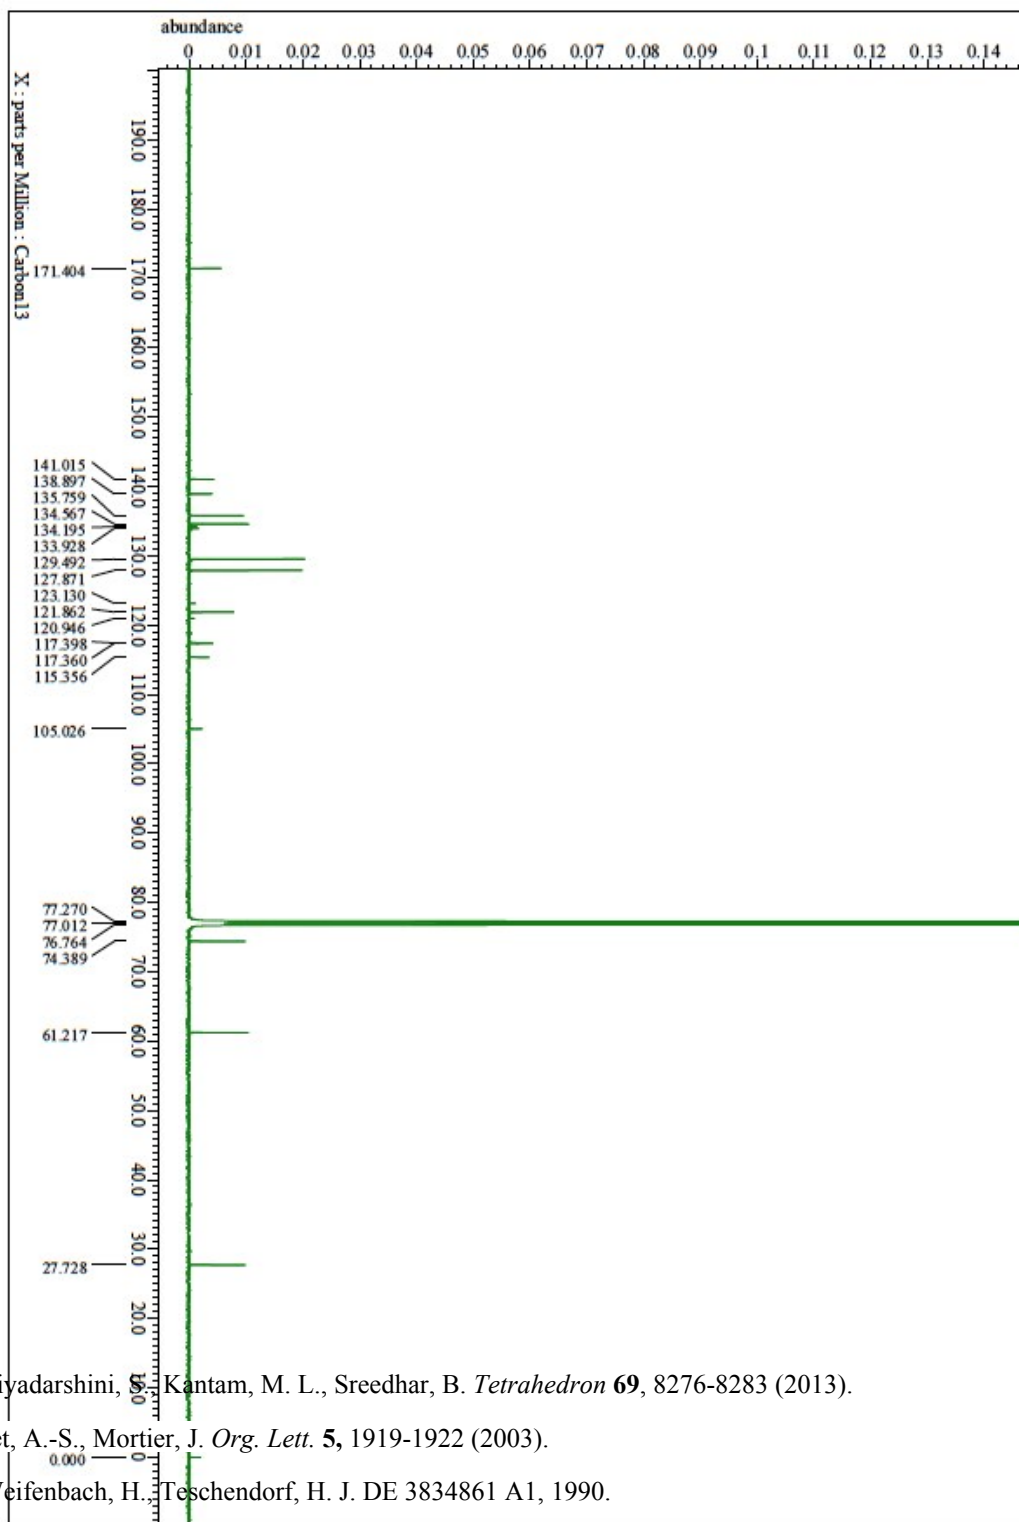

## References

1. Joseph, P. A. J., Priyadarshini, S., Kantam, M. L., Sreedhar, B. *Tetrahedron* **69**, 8276-8283 (2013).
2. Gohier, F., Castanet, A.-S., Mortier, J. *Org. Lett.* **5**, 1919-1922 (2003).
3. Rendenbach, B., Weifenbach, H., Teschendorf, H. J. DE 3834861 A1, 1990.
4. Xie, L., Guo, H. F., Lu, H., Zhuang, X. M., Zhang, A. M., Wu, G., Ruan, J. X., Zhou, T., Yu, D., Qian, K., Lee, K. H., Jiang, S. L. *J. Med. Chem.* **51**, 7689-7696 (2008).
5. M. J. Frisch, G. W. Trucks, H. B. Schlegel, G. E. Scuseria, M. A. Robb, J. R. Cheeseman, G. Scalmani, V. Barone, B. Mennucci, G. A. Petersson, H. Nakatsuji, M. Caricato, X. Li, H. P. Hratchian, A. F. Izmaylov, J. Bloino, G. Zheng, J. L. Sonnenberg, M. Had, and D. J. F. Gaussian, Inc., Wallingford CT, 2013.

*Gaussian 09, Revis. E.01.*

6. Zhao, Y., Truhlar, D. G. Density Functionals with Broad Applicability in Chemistry. *Acc. Chem. Res.* **41**, 157–167 (2008).
7. Hariharan, P. C., Pople, J. A. The Influence of Polarization Functions on Molecular Orbital Hydrogenation Energies. *Theor. Chim. Acta* **28**, 213–222 (1973).
8. Francl, M. M., Pietro, W. J., Hehre, W. J., Binkley, J. S., Gordon, M. S., DeFrees, D. J., Pople, J. A. Self-consistent Molecular Orbital Methods. XXIII. A Polarization-type Basis Set for Second-row Elements. *J. Chem. Phys.* **77**, 3654–3665 (1982).
9. Rassolov, V. A., Ratner, M. A., Pople, J. A., Redfern, P. C., Curtiss, L. A. 6-31G\* Basis Set for Third-Row Atoms. *J. Comput. Chem.* **22**, 976–984 (2001).
10. Simon, S., Duran, M., Dannenberg, J. J. How Does Basis Set Superposition Error Change the Potential Surfaces for Hydrogen-bonded Dimers? *J. Chem. Phys.* **105**, 11024 (1998).
11. Boys, S. F., Bernardi, F. The Calculation of Small Molecular Interactions by the Differences of Separate Total Energies. Some Procedures with Reduced Errors. *Mol. Phys.* **19**, 553–566 (1970).
